# 1 **Transcriptome profiling in Indian Cattle revealed novel insights** 2 **into response to heat stress**

3 Raja Ishaq Nabi Khan <sup>a†</sup>, Amit Ranjan Sahu <sup>a†</sup>, Waseem Akram Malla <sup>a</sup>, Manas Ranjan Praharaj  
4 <sup>b</sup>, Neelima Hosamani <sup>b†</sup>, Shakti Kumar <sup>b</sup>, Smita Gupta <sup>a</sup>, Shweta Sharma <sup>a</sup>, Archana Saxena <sup>a</sup>,  
5 Anshul Varshney <sup>a</sup>, Pragya Singh <sup>a</sup>, Vinay Verma <sup>c</sup>, Puneet Kumar <sup>c</sup>, Gyanendra Singh <sup>c</sup>,  
6 Aruna Pandey <sup>a</sup>, Shikha Saxena <sup>a</sup>, Ravi Kumar Gandham <sup>b#</sup>, Ashok Kumar Tiwari <sup>d#</sup>

7  
8 <sup>a</sup> Division of Veterinary Biotechnology, Indian Veterinary Research Institute, Bareilly, India

9 <sup>b</sup> Computational Biology and Genomics, National Institute of Animal Biotechnology,  
10 Hyderabad, India

11 <sup>c</sup> Division of Physiology and Climatology, Indian Veterinary Research Institute, Bareilly, India

12 <sup>d</sup> Division of Biological Standardization, Indian Veterinary Research Institute, Bareilly, India

13  
14 <sup>†</sup>Equal Contributors

15  
16 <sup>#</sup> Corresponding Authors: Ravi Kumar Gandham ,[ravigandham@niab.org.in](mailto:ravigandham@niab.org.in)

17 Ashok Kumar Tiwari, [aktiwari71d@gmail.com](mailto:aktiwari71d@gmail.com)

## 18 **Abstract**

19  
20 Heat stress induced by high environmental temperature and humidity affects livestock  
21 production and health. With global warming on the uprise, indigenous cattle known for their heat  
22 tolerance are gaining importance than the Crossbreds. However, systems biology behind this  
23 phenotype in indigenous cattle is less known. This study, revealed novel insights in response to  
24 heat stress in Indian cattle (Tharparkar breed – Indigenous breed vs Vrindhavani – Crossbred  
25 ).The number of DEGs in Crossbred were found to be more, than in Tharparkar, suggesting a  
26 greater dysregulation in systems biology in Crossbred. A contrast in gene expression was  
27 observed with 18.5 % of upregulated genes in Crossbred (Vrindavani cattle) were downregulated  
28 in Tharparkar and 17.5% upregulated genes in Tharparkar were downregulated in Crossbred. The  
29 increased HSPs levels have been found positively correlated with tolerance in many species.  
30 Upregulation of *HSF*, *HSP70*, *HSP90*, and activation of EIF2 signaling pathway in Tharparkar  
31 and vice-versa in Crossbred delineates how Tharparkar, withstands heat stress. Unlike Crossbred,  
32 Tharparkar is not only endowed with higher expression of the scavengers (*UBE2G1*, *UBE2S*, and  
33 *UBE2H*) of misfolded proteins but also with protectors (*VCP*, *Serp1*, and *CALR*) of naïve  
34 unfolded proteins. Further, the apoptotic genes that were dysregulated in both genetic groups  
35 indicated a relatively higher probability of apoptosis in Crossbred than in Tharparkar. Also,  
36 higher expression of the antioxidants in Tharparkar enables it to cope up with higher levels of

37 free radicals generated as a result of heat stress. In this study we found relevant molecules/genes  
38 dysregulated in Tharparkar in the direction that can counter heat stress. To best of our knowledge  
39 this is a comprehensive comparison between Tharparkar and Crossbred under heat stress using  
40 transcriptome analysis.

41

## 42 **Introduction**

43

44 Cattle being homoeothermic, modulate their internal body temperature in sync to  
45 environmental temperature by equilibrating the amount of heat produced within the body and  
46 dissipating it to the ambient environment. The stress that arises due to disproportionate  
47 thermodynamic behavior between cattle and its surrounding environment is termed as heat stress  
48 <sup>1</sup>. Environmental induced hyperthermic stress lowers feed intake, which in turn reduces growth,  
49 milk production and reproductive efficiency, thereby negatively affecting the economics of  
50 livestock keepers <sup>2-4</sup>. Heat stress has been associated with reduced fertility through its deleterious  
51 impact on oocyte maturation and early embryonic development <sup>5</sup>. Increased morbidity and  
52 mortality was observed in animals due to immune depressive effect of heat stress <sup>6</sup>.

53 India has a wide variety of indigenous cattle breeds distributed throughout its agro-  
54 climatic zones. These are known for their natural tolerance to tropical heat <sup>7,8</sup>. To meet the  
55 growing demand for milk and to combine the heat tolerance and tick resistance of zebu with the  
56 productivity of temperate dairy breeds <sup>9</sup> several crossbreeding programs were taken up in India.  
57 Every state had its own crossbreeding policy, which is agro-climatic and breed-specific. Though  
58 the zebu crosses with European breeds produced more milk than zebu, they were found not  
59 withstanding heat/solar radiation <sup>10</sup>. Crossbreds are susceptible to tropical diseases and require a  
60 constant input of good management conditions <sup>8</sup>. Antagonism exists between heat tolerance and  
61 milk productivity <sup>11</sup>. The adaptive capacity to heat stress varies between species and genetic  
62 groups within species. Among various adaptive mechanisms, physiological adaptability seems to  
63 be the primary step in cattle. Sahiwal cows better regulate body temperature in response to heat  
64 stress than Karan Fries <sup>8</sup>. It was observed that Ongole cattle rely on the respiration rate to  
65 maintain thermal balance, while, Bali cattle rely on rectal temperature <sup>12</sup>. In Brazil, Sindhi and  
66 Girolando breeds showed better physiological response to thermal stress than Gir cattle <sup>13</sup>.  
67 Increase in respiration rate was reported in Nellore breed when exposed to heat load <sup>14</sup>.

68 In India, Tharparkar is one among the best dairy breeds. It is adapted to the Indian states  
69 of Punjab and Haryana.<sup>15,16</sup> It is considered to be the hardiest, disease resistant, heat tolerant  
70 and tick resistant indigenous cattle breed of the country<sup>17</sup>. This breed has also been used in  
71 several crossbreeding programs. Currently, percentage of purebreds is exceptionally low in India  
72 (Department of Animal Husbandry & Dairying, Govt. of India). Most of the farmer's in India  
73 have Crossbreds and the percentage of exotic inheritance in these Crossbreds is unknown.  
74 Vrindavani, a Crossbred (synthetic), with 27% of Indigenous blood and 73% of exotic  
75 inheritance<sup>18</sup> is a representation of the kind of admixture that prevails in Indian cattle. Therefore,  
76 comparing Tharparkar with Vrindavani may establish the lost importance of Indigenous cattle  
77 and would further emphasize the need of conserving our indigenous purebreds because of  
78 advantageous traits like Heat tolerance.

79 Studies explaining the difference between the genetic groups (Crossbreds and Indigenous  
80 cattle) have been done mainly to address the physiological responses vis – a – vis heat stress and  
81 very few studies at the genomic level have been taken up<sup>19,20</sup>. Also, there is an increasing need to  
82 develop methods by combining the knowledge from -omics technologies to identify heat tolerant  
83 animals<sup>11</sup>. Transcriptome profiling / RNA-Sequencing (RNA-seq) is a high throughput omics  
84 approach to measure relative global changes in the transcripts under specific condition(s)<sup>21-23</sup> to  
85 study the systems biology behind a phenotype<sup>23,24</sup>. RNA - seq allows for analysis of  
86 transcriptome in an unbiased way, with, a tremendous dynamic detection range (>8,000 fold),  
87 and low background signals<sup>25</sup>. It has been used as an investigating tool in understanding disease  
88 pathogenesis<sup>26,27</sup> and differential physiological response to various biotic and abiotic factors  
89<sup>28,29</sup>.

90 In this study, Tharparkar and Crossbred - Vrindavani cattle were subjected to heat stress  
91 and blood samples were collected on 0<sup>th</sup> day and 7<sup>th</sup> day, as it is known that short term  
92 acclimation occurs around 5 - 6 days<sup>30,31</sup>. The transcriptome of 7<sup>th</sup> day was compared and with  
93 0<sup>th</sup> day in both the genetic groups to understand their differential response to heat stress.

## 94 **Results**

### 95 **Physiological Parameters**

96 The overview of the analysis is given in Figure 1. Respiration rate (RR), rectal  
97 temperature (RT) and T3 level increased significantly ( $p < 0.05$ ) on 7<sup>th</sup> - day post heat stress in

98 both the genetic groups (n=5) (Figure 2). However, the increase in RR, RT and T3 level, was  
99 found significantly ( $P<0.05$ ) higher in Crossbred than in Tharparkar.

### 100 **Comparison of DEGs of Crossbred and Tharparkar under heat stress**

101 The differentially expressed genes for each genetic group were obtained on comparing  
102 the 0 day and 7<sup>th</sup> day RNA-seq data using EdgeR after obtaining the gene counts from RSEM.  
103 Under heat stress, global expression profiles of Crossbred and Tharparkar were identified with  
104 6042 and 4718 differentially expressed genes (DEGs), respectively (Supplementary Table 1).  
105 Among these, 3481 DEGs were found common between the two genetic groups, while 2561 and  
106 1238 DEGs were uniquely found in Crossbred and Tharparkar, respectively (Figure 3a).  
107 Additionally, 3132 and 2924 genes were upregulated and downregulated in Crossbred,  
108 respectively, while 2367 and 2358 genes were upregulated and downregulated in Tharparkar,  
109 respectively (Figure 3b). On comparison of upregulated and downregulated genes, 724 and 1416  
110 genes were found uniquely upregulated and 514 and 1145 genes were found uniquely  
111 downregulated in Tharparkar and Crossbred, respectively. The comparison also revealed that  
112 17.5% of upregulated genes (1278) in Tharparkar were downregulated in Crossbred and 18.5%  
113 downregulated genes (1344) in Tharparkar were upregulated in Crossbred. However, the number  
114 of common upregulated and downregulated genes in both the genetic groups were 357 (4.9%)  
115 and 498 (6.8%), respectively (Figure 3c).

### 116 **Analysis of knowledge-based genes**

117 Under heat stress four major physiological processes are found to be usually associated  
118 with heat stress viz. elicitation of unfolded protein response (UPR) in cells; Induction of  
119 apoptosis; Ubiquitination and; Imbalance in production of ROS and antioxidants (refer to  
120 materials and methods for details). Heat shock genes and its associated genes are involved in  
121 elicitation of unfolded protein response (UPR) in cells. Heat shock genes have been found  
122 dysregulated under heat stress in both the genetic groups. Most of the genes encoding Heat  
123 shock proteins (HSPs) - Heat shock 70 kDa protein 4 (*HSPA4*), Heat shock cognate 71 kDa  
124 protein (*HSPB8*), Heat shock 70 kDa protein 1A (*HSPA1A*), Heat shock cognate 71 kDa protein  
125 (*HSPA8*), Heat shock protein HSP 90-beta (*HSP90AB1*) and Heat shock protein HSP 90-alpha  
126 (*HSP90AA1*) and heat shock protein regulating factors- Heat shock factor 1 (*HSF1*) and  
127 Eukaryotic Translation Elongation Factor 1 Alpha 1 (*EEF1A1*) have been found to be

128 downregulated/not-differentially expressed in Crossbred but upregulated in Tharparkar.  
129 However, Calcium/Calmodulin Dependent Protein Kinase II Delta (*CAMK2D*) that is involved  
130 in the regulation of expression of heat shock genes was upregulated in Crossbred and  
131 downregulated in Tharparkar.

132 Among the apoptotic genes, genes encoding Bcl-2-like protein 11 (*BCL2L11*), Tumor  
133 necrosis factor ligand superfamily member 6 (*FASLG*), TIR domain-containing adapter  
134 molecule 2 (*TICAM2*), Toll-like receptor 4 (*TLR4*), Adenomatous polyposis coli protein  
135 (*APC*), Caspase-3 (*CASP3*), Mitogen-activated protein kinase 8 (*MAPK8*), Mixed lineage  
136 kinase domain-like protein (*MLKL*), Late endosomal/lysosomal adaptor and MAPK and MTOR  
137 activator 5 (*XIP*), Vimentin (*VIM*), and High mobility group protein B2 (*HMGB2*) were found to  
138 be upregulated in Crossbred and downregulated in Tharparkar. The number of upregulated genes  
139 involved in achieving the balance of ROS production and antioxidants, were found to be more in  
140 Tharparkar than in Crossbred. Among these, genes encoding Glutathione peroxidase 3  
141 (*GPX3*), Nudix Hydrolase 2 (*NUDT2*), Catalase (*CAT*), Cytochrome c (*CYCS*), Copper  
142 chaperone for superoxide dismutase (*CCS*), Peroxiredoxin-5 (*PRDX5*), Peroxiredoxin-6  
143 (*PRDX6*), Peroxiredoxin-1 (*PRDX1*), Superoxide dismutase (*SOD1*), and Cytochrome b-245  
144 heavy chain (*CYBB*) were found either downregulated/not-differentially expressed in Crossbred  
145 and upregulated in Tharparkar. More number of genes involved in Ubiquitination were  
146 differentially expressed in Crossbred than in the Tharparkar. Genes encoding Ubiquitin-  
147 conjugating enzyme E2 G1 (*UBE2G1*), Ubiquitin-conjugating enzyme E2 (*UBE2S*), Ubiquitin-  
148 conjugating enzyme E2 H (*UBE2H*), Ubiquitin A-52 residue ribosomal protein fusion product 1  
149 (*UBA52*), and Ubiquitin-activating enzyme E1 (*UBA1*) have been found downregulated/not-  
150 differentially expressed in Crossbred and upregulated in Tharparkar. However, Valosin-  
151 containing protein (*VCP*), RING finger protein 40 (*RNF40*), and Ubiquitin-conjugating enzyme  
152 E2 L3 (*UBE2L3*) have been found downregulated in Crossbred but not-differentially expressed  
153 in Tharparkar. Among the genes involved in Unfolded Protein folding response (UPR), genes  
154 encoding Membrane-bound transcription factor site-1 protease (*MBTPS1*), Cyclic AMP-  
155 responsive element-binding protein 3-like protein 1 (*CREB3L1*), Stress-associated endoplasmic  
156 reticulum protein 1 (*SERP1*), Glycogen synthase kinase-3 alpha (*GSK3A*), Eukaryotic  
157 translation initiation factor 2 subunit 3 (*EIF2S3*), Calreticulin (*CALR*), and Stress-associated

158 endoplasmic reticulum protein 1 (*SERP1*) have been found downregulated in Crossbred and  
159 upregulated in Tharparkar (Figure 4).

160 **Protein - protein interaction (PPI) network revealed functional importance of HSP70**  
161 **(*HSPA8* and *HSPA1A*) and ubiquitin (*UBB*, *UBA52*), in coordinating genes involved in heat**  
162 **stress**

163 A total of 246 knowledge-based genes were identified from the reactome database. Out of  
164 these 177 and 194 genes were found to be differentially expressed in Tharparkar and Crossbred,  
165 respectively. Among these 126 genes were found to be commonly differentially expressed in  
166 Tharparkar and Crossbred. PPI network for these common knowledge-based genes between  
167 Tharparkar and Crossbred was constructed (Supplementary Figure 1). In PPI networks, hubs  
168 define the functional and structural importance of a network. The genes, which act as hubs in PPI  
169 networks were found to be *UBB*, *UBA52*, *HSPA8*, and *HSPA1A* (Supplementary Figure 1).  
170 Among the 4 hubs, *UBB* was downregulated in both genetic groups and the rest were  
171 downregulated in Crossbred and upregulated in Tharparkar.

172 A change in the expression of the hub protein will have a larger effect than change in  
173 expression of non-hub proteins<sup>32</sup>. Therefore, *UBB*, *UBA52*, *HSPA8*, and *HSPA1A* are taken to  
174 be critical for coordinating the changes in systems biology under heat stress. The hubs *HSPA8*  
175 and *HSPA1A* are connected to genes that are associated with regulation of stress viz.  
176 nucleoporins genes - *NUP188*, *NUP155*, *NUP210* & *NUP214*; BAG family molecular chaperone  
177 regulators - *BAG1*, *BAG3* & *BAG4*; Heat Shock Protein Family A - *HSPA5*, *HSPA4*, *HSPA12B*  
178 & *HSPA9*; DnaJ Heat Shock Protein Family i.e. HSP40 - *DNAJ1*, *DNAJ2* & *DNAJB6*; Heat  
179 shock factor - *HSF1*; Ubiquitin - *UBB* & *UBA52* and; Sirtuin - *SIRT1*. The hubs - *UBB* and  
180 *UBA52* are connected to molecules of different proteasome subunits viz.  $\alpha$  type subunits -  
181 *PSMA1* & *PSMA2*;  $\beta$  type subunits - *PSMB4* & *PSMB8*; ATPase subunits - *PSMC2* & *PSMC5*  
182 and non-ATPase subunits - *PSMD2* & *PSMD13*. These hubs were also found connected to  
183 ubiquitin specific peptidases - *USP9X* and *USP7* and Ubiquitin-conjugating enzyme - *UBE2B*,  
184 *UBE2G1*, *UBE2Z*, *UBE2H*, *UBE2J2*, *UBE2S* & *UBE2D2*.

185 **Canonical pathway analysis by Ingenuity Pathway Analysis (IPA) revealed contrast in**  
186 **signaling pathways in Crossbred and Tharparkar**

187 Canonical pathways associated with Crossbred and Tharparkar are represented in Figure  
188 5a and 5b. In Crossbred, Oncostatin M Signaling, Phospholipase C Signaling, EIF2 Signaling,



189 Integrin Signaling, IL-3 Signaling, and CXCR4 Signaling were found to be highly inactivated (Z  
190 – score > 2.0) and PTEN signaling was found to be highly activated (Z – score < 2.0). In  
191 Tharparkar, EIF2 Signaling, Androgen Signaling, Oncostatin M Signaling,  $\alpha$ -Adrenergic  
192 Signaling, BMP signaling pathway, and UVC-Induced MAPK Signaling were found to be highly  
193 activated and PTEN signaling was found to be inactivated. The canonical pathway Oncostatin M  
194 Signaling and EIF2 Signaling were found to have the highest ratio of genes involved vis-a-vis  
195 the genes in the database in Crossbred and Tharparkar, respectively.

196 While carrying out comparative analysis through IPA, Calcium-induced T Lymphocyte  
197 Apoptosis, BMP signaling pathway, UVC-Induced MAPK Signaling, Regulation of Cellular  
198 Mechanics by Calpain Protease, fMLP Signaling in Neutrophils, Melatonin Signaling, and  
199 Leukocyte Extravasation Signaling, were found inactivated in Crossbred and activated in  
200 Tharparkar (Supplementary Figure 2). Genes involved in Oncostatin M Signaling- Growth  
201 factor receptor-bound protein 2 (*GRB2*), GTPase HRas (*HRAS*), Janus kinase 1 (*JAK1*), Janus  
202 kinase 3 (*JAK3*), Mitogen-activated protein kinase kinase 1 (*MAP2K1*), Mitogen-activated  
203 protein kinase 1 (*MAPK1*), Oncostatin-M (*OSM*), Ras-related protein Rap-1b (*RAP1B*), Ras-  
204 related protein Rap-2a (*RAP2A*), Signal transducer and activator of transcription 1-alpha/beta  
205 (*STAT1*), Signal transducer and activator of transcription 5B (*STAT5B*), Non-receptor tyrosine-  
206 protein kinase (*TYK2*), and Ras-related protein (*RRAS*) were found downregulated in Crossbred  
207 and upregulated in Tharparkar (Figure 6a, b). While the key genes involved in PTEN Signaling  
208 pathway – Fas Ligand (*FASLG*), member of RAS oncogene family (*RAP2A*), Bcl-2-like protein  
209 11 (*BIM*), Caspase-3 (*CASP3*) and microspherule protein 1 (*MSP58*) were found upregulated in  
210 Crossbred and downregulated in Tharparkar as well (Figure 7a, b).

### 211 **Variation in microRNAs and Transcription factors**

212 IPA, on evaluating the differentially expression genes predicts miRNAs and  
213 Transcription Factors (upstream regulators). In Crossbred, 111 miRNAs were found to be  
214 inactivated and 37 activated. In Tharparkar, 205 miRNAs were found to be inactivated and 272  
215 activated. Among them, 52 microRNAs were found common between the two genetic groups.  
216 Most of the common miRNAs were found activated in Crossbred and inactivated in Tharparkar  
217 (Supplementary Figure 3). miR-4779, miR-4651, miR-1207-5p, miR-6967-5p and miR-504-3p  
218 are the top 5 miRNAs that were activated in Crossbred and inactivated in Tharparkar.

219 Various Transcription factors were found to regulate the expression of the identified  
220 DEGs. Transcription factors, 19 in Tharparkar (11 activated and 8 inactivated) and 26 in  
221 Crossbred (8 activated and 18 inactivated) were identified in IPA that regulate the expression of  
222 DEGs. Among them, *PAX5*, *MTA3*, *MYC*, *PROX1* and *SMAD7* in Crossbred and, *HMGAI*, *MAF*,  
223 *MAX* *NOTCH22* and *NCOR1* in Tharparkar are the top 5 upregulated and activated TFs. On  
224 comparing the TFs of Tharparkar and Crossbred, it was found that *BHLHE40*, *HMGAI*,  
225 *HMGB1*, *IKZF1*, and *TCF7* were found to be common. *BHLHE40*, *HMGAI*, and *TCF7* were  
226 found to be activated in Tharparkar and inactivated in Crossbred and it was vice - versa with  
227 *HMGB1* and *IKZF1* (Supplementary Figure 4)

## 228 **Real-time validation.**

229 Six genes (*HSF1*, *SOD1*, *CALR*, *GSK3A*, *CAT* & *GPX3*) that were upregulated in  
230 Tharparkar but downregulated/not expressed in crossbred and four genes (*CASP3*, *FASLG*,  
231 *BCL2L11* & *APC*) that were upregulated in crossbred but downregulated in Tharparkar were  
232 considered for Real time PCR based on their role in heat stress. Briefly, *CALR* is involved in  
233 unfolded protein response upon Endoplasmic reticulum stress; *HSF1* in trimer induces the  
234 expression of HSPs; *GSK3A*, kinase inhibits trimerization of *HSF1* regulating the expression of  
235 HSPs; *SOD1* converts free radical into hydrogen peroxide, which is further converted by *GPX3A*  
236 and/or *CAT* into water and oxygen molecules in regulatory pathway of ROS scavenging and ;  
237 *BCL2L11*, *FASLG*, *APC* and *CASP3* induce apoptosis in stressed cell. The expression of genes  
238 was in concordance with the RNA- Seq results (Supplementary Figure 5 and Supplementary  
239 table 2).

## 240 **Discussion**

241 Heat stress is a natural phenomenon that affects domestic animals in tropical, sub-tropical  
242 and often in temperate regions of the world during summer months. Heat and humidity during  
243 the summer months combine to make an uncomfortable environment for dairy cattle. Heat stress  
244 negatively impacts a variety of dairy parameters resulting in economic losses<sup>33</sup>. Response to  
245 heat stress varies with species and genetic groups within species<sup>5,34,35</sup>. In this study,  
246 transcriptome of genetic groups – Crossbred and Tharparkar cattle under heat stress was  
247 evaluated to understand their differential response to heat stress.



248           Animals (n=5) of both the genetic groups were exposed to a temperature of 42 °C for 7  
249 days. Around 5<sup>th</sup>- 6<sup>th</sup> day, short term heat acclimation occurs<sup>30,31</sup>. This time point was selected  
250 to understand the differences in systems biology to heat stress in the two genetic groups.  
251 Initially, heat stress indicators - RR, RT, and T3 level were evaluated. RR was found to increase  
252 in both genetic groups under heat treatment and the increase in Crossbred was found to be  
253 significantly (P<0.05) different from that in Tharparkar. A positive correlation exists between  
254 RR and heat treatment<sup>36-38</sup>. This increase is an attempt to dissipate excess body heat by  
255 vaporizing more moisture in expired air or response to a greater requirement of oxygen by  
256 tissues under heat stress. Also, the physiological response to heat stress includes reduced heat  
257 production, which is achieved by lowering feed intake and thyroid hormone secretion<sup>39</sup>. T3 level  
258 increases under heat stress<sup>40,41</sup>. A significant increase in T3 level in Crossbred as compared to  
259 Tharparkar indicates an effective regulatory mechanism in modulating T3 levels in Tharparkar in  
260 response to heat stress. The T3 triggered metabolism may be one of the reasons that increases  
261 heat production resulting in high rectal temperature in Crossbred in comparison to Tharparkar as  
262 was found in our study. The significant increase in RR, RT and T3 level in Crossbred than in  
263 Tharparkar, suggests the inability of Crossbred to cope up with heat stress in comparison to  
264 Tharparkar.

265           A phenotype is defined by the changes in systems biology. Transcriptome profiling by  
266 RNA-seq is the most common methodology to study the changes in systems biology. RNA  
267 profiling based on next-generation sequencing enables to measure and compare gene expression  
268 patterns<sup>21</sup>. The transcriptome of Tharparkar and Crossbred indicated differential response to heat  
269 stress as evident from the DEGs, which were either distinct to both or have a difference in  
270 expression. The number of DEGs were higher in Crossbred than in Tharparkar, suggesting a  
271 greater dysregulation in systems biology in Crossbred. Among the dysregulated genes, the  
272 number of upregulated genes were more than the downregulated genes in both genetic groups.  
273 However, a contrast in expression was observed with 18.5 % of upregulated genes in Crossbred,  
274 were downregulated in Tharparkar and 17.5% upregulated genes in Tharparkar  
275 weredownregulated in Crossbred. Some of the genes were confirmed for their expression by  
276 Realtime PCR. The genes selected for Realtime PCR were selected based on their role in the  
277 major physiological processes usually associated with heat stress.

278 IPA revealed activation or inactivation of several pathways in both the genetic groups. It  
279 is known that - EIF2 signalling, helps in initiation of global protein translation <sup>42</sup>; MAPK-  
280 signalling pathway, induces cell proliferation <sup>43</sup>; androgen signalling, enhances pro-survival and  
281 anti-apoptotic activity in cell <sup>44</sup>;  $\alpha$ -Adrenergic signalling, maintains immune defence mechanism  
282 <sup>45</sup> and, helps in tissue repair upon stress <sup>46</sup> and increases angiogenesis <sup>47</sup>; integrin pathway, resists  
283 the cell against apoptosis and other environmental insults <sup>48</sup>; IL-3 signalling, aids in cell survival  
284 and haematopoiesis <sup>49</sup>; CXCR4 signalling modulates cell survival and cell motility <sup>50</sup> and ;  
285 Phospholipase C signalling aids in cell survival in stress through protein kinase C dependent  
286 phosphorylation of BCL-2 <sup>51</sup>. Inactivation of these pathways except MAPK-signalling pathway  
287 in Crossbred and activation of  $\alpha$ -Adrenergic signalling, Androgen signalling, EIF2 signalling  
288 and MAPK signalling in Tharparkar indicates that the systems biology in Tharparkar is moving  
289 towards countering the effects due to heat stress.

290 While exploring the DEGs at a functional level we considered a knowledge-based  
291 approach. Under this, four major physiological processes are found to be usually associated with  
292 heat stress viz. elicitation of unfolded protein response (UPR) in cells; Ubiquitination; Induction  
293 of apoptosis and; Imbalance in production of ROS and antioxidants (Figure 13). Heat shock and  
294 its associated genes are involved in elicitation of unfolded protein response (UPR) in cells. Most  
295 of the heat shock genes were found upregulated in Tharparkar and downregulated in Crossbred.  
296 The increased HSP levels have been found positively correlated with tolerance in many  
297 species<sup>52,53</sup>. HSF1, that positively regulates the transcription of *HSP70* and *HSP90* <sup>54,55</sup> was  
298 found upregulated in Tharparkar and downregulated in Crossbred. Upregulation of *HSF1*,  
299 *HSP70* and *HSP90* in Tharparkar and vice-versa in Crossbred corroborates to state that  
300 Tharparkar is better equipped to counter heat stress than Crossbred. Further, to ensure that the  
301 *HSP70* in Tharparkar is maintained at an optimum level, dysregulation of *CAMK2D* and *GSK3A*  
302 seems to act as negative feedback. *CAMK2D* that induces the transcription of *HSP70* via HSF1  
303 <sup>56</sup> was found downregulated in Tharparkar. *GSK3A* that inhibits the trimerization of HSF1 that is  
304 needed for the induction of *HSP70* <sup>57</sup> was found upregulated in Tharparkar. The decreased level  
305 of *HSP70* in Crossbred makes it inevitable that such negative feedbacks would further reduce its  
306 level and hence, *GSK3A* was found downregulated and *CAMK*, upregulated (Figure.13).

307 Ubiquitination is positively correlated with heat tolerance <sup>58,59</sup>. Ubiquitin-Proteasome  
308 System (UPS) regulates the levels of proteins and acts by removing the misfolded or damaged  
309 proteins that may accumulate as a result of exposure to abiotic stress. Malfunctioning of  
310 ubiquitin-proteasome system (UPS) could have negative consequences for protein regulation,  
311 including loss of function <sup>60</sup>. In Tharparkar after heat acclimation, HSP70 tends to activate the  
312 ubiquitination pathway to minimize the accumulation of the unfolded proteins that can't be  
313 refolded by it <sup>61</sup>. This pathway activation is supported by upregulation of E2 ligases - *UBE2G1*,  
314 *UBE2S*, and *UBE2H* that catalyze covalent attachment of E2 to E3 <sup>62-65</sup> in Tharparkar. USP7  
315 that deubiquitinates target proteins <sup>66,67</sup> was found upregulated in Crossbred and downregulated  
316 in Tharparkar. Further, a group of molecules – *VCP*, *SERPI*, and *CALR* that ensure the  
317 protection of naïve proteins during their transport within the cell <sup>68-70</sup> were found upregulated in  
318 Tharparkar and downregulated in Crossbred. Unlike Crossbred, Tharparkar is not only endowed  
319 with higher expression of the scavengers of misfolded proteins but also with protectors of naïve  
320 unfolded proteins.

321 Activation of apoptosis pathway is one of the major physiological processes linked with  
322 heat stress. Among the apoptotic genes, *BCL2L11*, *FASLG*, *MLKL*, *CASP3*, *MAPK8*, and *VIM*  
323 have been found upregulated in Crossbred and downregulated in Tharparkar under heat stress.  
324 *BCL2L11* induces apoptosis by neutralizing key molecules of pro-survival BCL2 sub-family  
325 <sup>71,72</sup>, *FASLG* transduces the apoptotic signal into cells<sup>73,74</sup>, *CASP3* activates caspases and  
326 executes apoptosis <sup>75</sup>, and *MAPK8*, *MLKL*, and *VIM* also induce apoptosis <sup>76,77</sup>. *PTEN*  
327 signaling pathway that drives apoptosis <sup>78,79</sup> was found inactivated in Tharparkar and activated in  
328 Crossbred. This indicates a relatively higher probability of apoptosis in Crossbred than in  
329 Tharparkar.

330 The ability to balance the ROS and antioxidant level, is one of the key factors that would  
331 determine the tolerance of an individual to heat stress. The antioxidant triad of *GPX*, *SOD*, and  
332 *CAT* that forms the first line of defense against reactive oxygen species <sup>80-82</sup>, was found  
333 upregulated in Tharparkar and downregulated in Crossbred. Additionally, genes belonging to  
334 Peroxiredoxins - *PRDX3*, *PRDX5* and *PRDX6* that catalyze the reduction of hydrogen peroxide  
335 and organic hydroperoxides <sup>83-87</sup>, were also found upregulated in Tharparkar and were either  
336 downregulated or not-differentially expressed in Crossbred. Higher expression of the

337 antioxidants in Tharparkar enables it to cope up with higher levels of free radicals generated as a  
338 result of heat stress while Crossbred is unable to do so.

## 339 **Conclusion**

340 A contrast in expression was observed with 18.5 % of upregulated genes in Crossbred  
341 were downregulated in Tharparkar and 17.5% upregulated genes in Tharparkar were  
342 downregulated in Crossbred. Transcripts of molecules that stimulate heat shock response,  
343 Ubiquitination, unfolded protein response and antioxidant level were found upregulated in  
344 Tharparkar and downregulated in Crossbred. EIF2 Signaling that promotes protein translation  
345 and PTEN signaling that drives apoptosis were found activated and inactivated in Tharparkar,  
346 respectively and vice-versa in Crossbred. We found relevant molecules/genes dysregulated in  
347 Tharparkar in the direction that counters heat stress. A proposed contrasting interplay of  
348 molecules in both the two groups is shown in Figure 8. To the best of our knowledge this is a  
349 comprehensive comparison between Tharparkar and Crossbred at a global level using  
350 transcriptome analysis.

## 351 **Methods**

### 352 **Experimental condition and Ethical Statement**

353 The animals used for the study were from the Indian Veterinary Research Institute. The  
354 permission to conduct the study was granted by Indian Veterinary Research Institutional Animal  
355 Ethics Committee (IVRI-IAEC) under the Committee for Control and Supervision of  
356 Experiments on Animals (CPCSEA), India, vide letter no 387/CPSCEA. Genetic groups -  
357 Tharparkar (Indigenous breeds) and Vrindavani (synthetic Crossbred) were considered in this  
358 study. Prior to experiment, the animals – 05 Tharparkar and 05 Crossbred (Vrindavani) cattle,  
359 were acclimatized for 15 days outside the Psychometric chamber. The experiment was conducted  
360 during October when the environmental Temperature Humidity Index (THI) was 73.0242. These  
361 animals were exposed in Psychometric chamber at 42 °C for six hours for 7 days (THI  
362 =78.5489). All the animals were fed with wheat straw and concentrate mixture in 60:40 ratios.  
363 Respiration rate (RR) and rectal temperature (RT) of animals from each genetic group were  
364 measured on 0 day (Control, n=5) before exposure to Psychometric chamber and on 7<sup>th</sup> day of  
365 heat exposure (Treated, n=5). Blood samples were collected from the animals at the mentioned

366 time points and serum concentration of Triiodothyronine (T3) was estimated by RIA technique  
367 using T<sub>3</sub> <sup>125</sup>I (Immunotech) as per the manufacturer's instructions.

### 368 **RNA sequencing (RNA-seq)**

369 PBMCs were collected from the blood samples using Ficol histopaque gradient method.  
370 Total RNA from each of the collected samples (PBMCs) was isolated using the RNeasy Mini kit  
371 (Qiagen GmbH, Germany) according to the manufacturer's protocol. The integrity and quantity  
372 of isolated RNA were assessed on a Bioanalyzer 2100 (Agilent Technologies, Inc). The library  
373 was prepared using NEBNext Ultra RNA Library Prep Kit for Illumina (NewEngland Biolabs  
374 Inc.) following the manufacturer's protocol. Approximately, 100ng of RNA from each sample  
375 was used for RNA library preparation. The quality of the libraries was assessed on Bioanalyzer.  
376 Libraries were quantified using a Qubit 2.0 Fluorometer (Life technologies) and by qPCR.  
377 Library (1.3ml, 1.8pM) was denatured, diluted and loaded onto a flow cell for sequencing.  
378 cDNA library preparation and Illumina Sequencing was performed at Sandor Life Sciences Pvt.  
379 (Hyderabad, India). Finally, the RNA-seq data were provided in FASTQ format.

### 380 **Data processing**

381 The sequenced reads were paired-end and 150bp in length. Quality control checks on raw  
382 sequence data from each sample were performed using FastQC (Babraham Bioinformatics).  
383 Processing of the data was performed using prinseq-lite software <sup>88</sup> to remove reads of low  
384 quality (mean phred score 25) and short length (< 50) for downstream analysis. The data was  
385 submitted to the GEO database with accession number GSE136652.

### 386 **Identification of Differentially Expressed Genes (DEGs)**

387 *Bos taurus* reference genome (release 94) and its associated gene transfer file (GTF) were  
388 downloaded from Ensembl FTP genome browser <sup>89</sup>. The reference genome was prepared and  
389 indexed by RNA-Seq by expectation maximization (RSEM) <sup>90</sup> by rsem-prepare-reference  
390 command. Further, the clean reads obtained from filtering of raw data were aligned to the  
391 indexed reference genome by Bowtie2 <sup>91</sup> to estimate gene abundance in counts by rsem-  
392 calculate-expression command. To compare the gene expression levels among different samples,  
393 the aligned reads were used to generate a data matrix by rsem-generate-data-matrix command.  
394 In each genetic group, all the samples of day 7 (treated) were compared with the day 0 (Control)

395 for the calculation of differential gene expression by edgeR<sup>92</sup> package. The Ensemble IDs of the  
396 differentially expressed genes (DEGs) were converted to the respective gene ID by g: Convert of  
397 g: Profiler<sup>93,94</sup>.

### 398 **Functional Analysis of DEGs**

399 Under heat stress four major physiological processes are found to be usually associated -  
400 Induction of apoptosis<sup>95,96</sup>; Ubiquitination<sup>97,98</sup>; elicitation of unfolded protein response (UPR)  
401 in cells<sup>99</sup> and ; Imbalance in production of ROS and antioxidants<sup>100,101</sup>. The genes involved in  
402 these processes were retrieved from Reactome database<sup>102</sup>. From these genes that are involved  
403 in the four major physiological processes, the genes that were differentially expressed in both the  
404 genetic groups were extracted to compare and contrast their expression between genetic groups.  
405 These genes were referred to as knowledge-based genes. Their protein-protein interaction  
406 network was also studied in both the genetic groups.

### 407 **Predicted protein-protein interaction of the knowledge-based genes**

408 Protein-protein interaction (PPI) network among the knowledge-based DEGs that were  
409 found common to both Tharparkar and Crossbred, was retrieved using interactions available in  
410 the String database<sup>103</sup>. The degree was calculated using igraph package ([https://cran.r-](https://cran.r-project.org/web/packages/igraph/index.html)  
411 [project.org/web/packages/igraph/ index.html](https://cran.r-project.org/web/packages/igraph/index.html)). The PPI network was then visualized using  
412 Cytoscape software V. 3.7<sup>104</sup>

### 413 **Ingenuity Pathway Analysis (IPA) Analysis**

414 QIAGEN's IPA (QIAGEN, Redwood City, USA)<sup>105</sup> is used to quickly visualize and  
415 understand complex omics data and perform insightful data analysis and interpretation by  
416 placing experimental results within the context of biological systems. Here, IPA was used to  
417 analyze the identified DEGs of Crossbred and Tharparkar. The list of DEGs from each genetic  
418 group was used to identify the canonical pathways and the most significant biological processes  
419 against Ingenuity Pathways Knowledge Base (IKB). Core analysis for each dataset was  
420 performed to know activated (Z score > 2) or inactivated (Z score < -2) canonical pathways.  
421 Upstream regulators - Transcription factors and microRNAs were also identified.

### 422 **Validation of reference genes identified**



423 Genes - *BCL2L11*, *FASLG*, *CASP3*, *CAT*, *SOD1*, *GSK3A*, *CALR*, *HSF1*, *APC*, and *GPX3*  
424 were selected based on their role in heat stress and qRT-PCR was performed on Applied  
425 Biosystems 7500 Fast system. *GAPDH* was taken as the internal control. Each of the samples  
426 was run in triplicates and relative expression of each gene was calculated using the  
427  $2^{-\Delta\Delta CT}$  method with control as the calibrator<sup>106</sup>.

#### 428 **Statistical Analysis**

429 Respiration rate, Rectal temperature and T3 level were compared using student's *t*-test in  
430 JMP9 (SAS Institute Inc., Cary, USA) to test the significance of the difference between the  
431 control (0 day) and treated (7<sup>th</sup> day). This comparison was done within and between genetic  
432 groups. Differences within/between groups were considered significant at  $P \leq 0.05$ .

#### 433 **Declarations**

##### 434 **Ethics approval and consent to participate**

435 The permission to conduct the study was granted by Indian Veterinary Research Institutional  
436 Animal Ethics Committee (IVRI-IAEC) under the Committee for Control and Supervision of  
437 Experiments on Animals (CPCSEA), India, vide letter no 387/CPSCEA.

##### 438 **Consent for publication**

439 Not applicable.

##### 440 **Availability of data and materials**

441 The data was submitted to the GEO database with accession number GSE136652

##### 442 **Competing interests**

443 None of the authors had a conflict of interest to declare

##### 444 **Funding**

445 This study was supported by “National Innovations in Climate Resilient Agriculture (NICRA) -  
446 Identification of unique factors in indigenous livestock making them resilient to climate change

447 in relation to diseases” for the funds to carryout Sampling, Wet Lab experiments and for the  
448 procurement of License of IPA.

#### 449 **Authors' contributions**

450 AKT and RG conceived and designed the research. SG, SmS, AS,AV, VV , PK , ShS and GS  
451 conducted the wet lab work. RINK, ARS, NH, WAM, MRP, SK , AP and RG analyzed the data.  
452 RINK, ARS, MRP, RG , AS and GS helped in manuscript drafting and editing. AKT and RG  
453 proofread the manuscript

#### 454 **Acknowledgements**

455 We also thank Department of Biotechnology, Govt of India for providing fellowship and  
456 contingency for RK (DBT Fellow No. DBT/2017/IVRI/768), ARS (DBT Fellow No.  
457 DBT/2014/IVRI/170) and WAM (DBT Fellow No. DBT/2017/IVRI/769).

#### 458 **References**

- 459 1 Mehla, K. *et al.* Genome-wide analysis of the heat stress response in Zebu (Sahiwal) cattle. *Gene*  
460 **533**, 500-507 (2014).
- 461 2 Armstrong, D. V. Heat stress interaction with shade and cooling. *J Dairy Sci* **77**, 2044-2050,  
462 doi:10.3168/jds.S0022-0302(94)77149-6 (1994).
- 463 3 Rojas-Downing, M. M., Nejadhashemi, A. P., Harrigan, T. & Woznicki, S. A. Climate change and  
464 livestock: Impacts, adaptation, and mitigation. *Climate Risk Management* **16**, 145-163 (2017).
- 465 4 Hahn, G. Dynamic responses of cattle to thermal heat loads. *Journal of animal science* **77**, 10-20  
466 (1999).
- 467 5 Dash, S. *et al.* Effect of heat stress on reproductive performances of dairy cattle and buffaloes: A  
468 review. *Veterinary world* **9**, 235 (2016).
- 469 6 Renaudeau, D. *et al.* Adaptation to hot climate and strategies to alleviate heat stress in livestock  
470 production. *Animal* **6**, 707-728 (2012).
- 471 7 Berman, A. Invited review: Are adaptations present to support dairy cattle productivity in warm  
472 climates? *Journal of Dairy Science* **94**, 2147-2158 (2011).
- 473 8 Rashamol, V. P. *et al.* Physiological adaptability of livestock to heat stress: an updated review. *J*  
474 *Anim Behav Biometeorol* **6**, 62-71 (2018).
- 475 9 Davis, S. R., Spelman, R. J. & Littlejohn, M. D. BREEDING AND GENETICS SYMPOSIUM:Breeding  
476 heat tolerant dairy cattle: the case for introgression of the "slick" prolactin receptor variant into  
477 dairy breeds. *J Anim Sci* **95**, 1788-1800, doi:10.2527/jas.2016.0956 (2017).
- 478 10 Mcmanus, C. M., Louvandini, H., Paim, T. P., Silva, F. C. P. e. & Bernal, F. E. M. Factors affecting  
479 heat tolerance in crossbred cattle in central Brazil. *Ciência Animal Brasileira* **15**, 152-158 (2014).
- 480 11 Carabano, M. J., Ramon, M., Menendez-Buxadera, A., Molina, A. & Diaz, C. Selecting for heat  
481 tolerance. *Anim Front* **9**, 62-68, doi:10.1093/af/vfy033 (2019).
- 482 12 Aritonang, S., Yuniati, R., Abinawanto, Imron, M. & Bowolaksono, A. in *AIP Conference*  
483 *Proceedings*. 030098 (AIP Publishing).

- 484 13 Cardoso, C. *et al.* Physiological and thermographic response to heat stress in zebu cattle.  
485 *Livestock Science* **182**, 83-92 (2015).
- 486 14 Valente, É. E. L. *et al.* Intake, physiological parameters and behavior of Angus and Nelore bulls  
487 subjected to heat stress. *Semina: Ciências Agrárias* **36**, 4565-4574 (2015).
- 488 15 Sodhi, M., Mukesh, M., Prakash, B., Ahlawat, S. & Sobti, R. Microsatellite DNA typing for  
489 assessment of genetic variability in Tharparkar breed of Indian zebu (*Bos indicus*) cattle, a major  
490 breed of Rajasthan. *Journal of genetics* **85**, 165-170 (2006).
- 491 16 Rachagani, S., Gupta, I. D., Gupta, N. & Gupta, S. Genotyping of  $\beta$ -Lactoglobulin gene by PCR-  
492 RFLP in Sahiwal and Tharparkar cattle breeds. *BMC genetics* **7**, 31 (2006).
- 493 17 Choudhary, S. *et al.* Tharparkar: The pride of desert. *Journal of entomology and zoology studies*  
494 **6**, 1915-1919 (2018).
- 495 18 Ahmad, S. F. *et al.* Revelation of genomic breed composition in a crossbred cattle of India with  
496 the help of Bovine50K BeadChip. *Genomics* **112**, 1531-1535, doi:10.1016/j.ygeno.2019.08.025  
497 (2020).
- 498 19 Salleh, M. *et al.* RNA-Seq transcriptomics and pathway analyses reveal potential regulatory  
499 genes and molecular mechanisms in high-and low-residual feed intake in Nordic dairy cattle.  
500 *BMC genomics* **18**, 258 (2017).
- 501 20 Cánovas, A., Rincon, G., Islas-Trejo, A., Wickramasinghe, S. & Medrano, J. F. SNP discovery in the  
502 bovine milk transcriptome using RNA-Seq technology. *Mammalian genome* **21**, 592-598 (2010).
- 503 21 Mortazavi, A., Williams, B. A., McCue, K., Schaeffer, L. & Wold, B. Mapping and quantifying  
504 mammalian transcriptomes by RNA-Seq. *Nature methods* **5**, 621 (2008).
- 505 22 Wang, Z., Gerstein, M. & Snyder, M. RNA-Seq: a revolutionary tool for transcriptomics. *Nature*  
506 *reviews genetics* **10**, 57 (2009).
- 507 23 Wani, S. A. *et al.* Contrasting gene expression profiles of monocytes and lymphocytes from  
508 Peste-des-petits-ruminants virus infected goats. *Frontiers in Immunology* **10** (2019).
- 509 24 Manjunath, S. *et al.* Comparative and temporal transcriptome analysis of peste des petits  
510 ruminants virus infected goat peripheral blood mononuclear cells. *Virus research* **229**, 28-40  
511 (2017).
- 512 25 Li, P., Piao, Y., Shon, H. S. & Ryu, K. H. Comparing the normalization methods for the differential  
513 analysis of Illumina high-throughput RNA-Seq data. *BMC bioinformatics* **16**, 347 (2015).
- 514 26 Khanduri, A. *et al.* Dysregulated miRNAome and proteome of PPRV infected goat PBMCs reveal a  
515 coordinated immune response. *Frontiers in immunology* **9**, 2631 (2018).
- 516 27 Pandey, A. *et al.* Modulation of host miRNAs transcriptome in lung and spleen of Peste des  
517 Petits ruminants virus infected sheep and goats. *Frontiers in microbiology* **8**, 1146 (2017).
- 518 28 O'Loughlin, A. *et al.* Transcriptomic analysis of the stress response to weaning at housing in  
519 bovine leukocytes using RNA-seq technology. *BMC genomics* **13**, 250 (2012).
- 520 29 Salama, A. *et al.* Different levels of response to heat stress in dairy goats. *Small Ruminant*  
521 *Research* **121**, 73-79 (2014).
- 522 30 Dangji, S. S. *et al.* Modulatory effect of betaine on expression dynamics of HSPs during heat  
523 stress acclimation in goat (*Capra hircus*). *Gene* **575**, 543-550 (2016).
- 524 31 Garrett, A. *et al.* Short-term heat acclimation is effective and may be enhanced rather than  
525 impaired by dehydration. *American journal of human biology* **26**, 311-320 (2014).
- 526 32 He, X. & Zhang, J. Why do hubs tend to be essential in protein networks? *PLoS Genet* **2**, e88,  
527 doi:10.1371/journal.pgen.0020088 (2006).
- 528 33 Polsky, L. & von Keyserlingk, M. A. Invited review: Effects of heat stress on dairy cattle welfare.  
529 *Journal of dairy science* **100**, 8645-8657 (2017).

- 530 34 Ross, J. *et al.* Physiological consequences of heat stress in pigs. *Animal Production Science* **55**,  
531 1381-1390 (2015).
- 532 35 Mayorga, E. J., Renaudeau, D., Ramirez, B. C., Ross, J. W. & Baumgard, L. H. Heat stress  
533 adaptations in pigs. *Animal Frontiers* **9**, 54-61 (2018).
- 534 36 Blackshaw, J. K. & Blackshaw, A. Heat stress in cattle and the effect of shade on production and  
535 behaviour: a review. *Australian Journal of Experimental Agriculture* **34**, 285-295 (1994).
- 536 37 Beede, D. & Collier, R. Potential nutritional strategies for intensively managed cattle during  
537 thermal stress. *Journal of Animal Science* **62**, 543-554 (1986).
- 538 38 Ganaie, A. *et al.* Biochemical and physiological changes during thermal stress in bovines: A  
539 review. *Iranian Journal of Applied Animal Science* **3**, 423-430 (2013).
- 540 39 Hansen, P. Physiological and cellular adaptations of zebu cattle to thermal stress. *Animal*  
541 *reproduction science* **82**, 349-360 (2004).
- 542 40 Magdub, A., Johnson, H. & Belyea, R. Effect of environmental heat and dietary fiber on thyroid  
543 physiology of lactating cows. *Journal of Dairy Science* **65**, 2323-2331 (1982).
- 544 41 Williamson, R., Misson, B. & Davison, T. The effect of exposure to 40 on the heat production and  
545 the serum concentrations of triiodothyronine, thyroxine, and corticosterone in immature  
546 domestic fowl. *General and comparative endocrinology* **60**, 178-186 (1985).
- 547 42 Rajesh, K. *et al.* Phosphorylation of the translation initiation factor eIF2alpha at serine 51  
548 determines the cell fate decisions of Akt in response to oxidative stress. *Cell Death Dis* **6**, e1591,  
549 doi:10.1038/cddis.2014.554 (2015).
- 550 43 Zhang, W. & Liu, H. T. MAPK signal pathways in the regulation of cell proliferation in mammalian  
551 cells. *Cell Res* **12**, 9-18, doi:10.1038/sj.cr.7290105 (2002).
- 552 44 Shiota, M., Yokomizo, A. & Naito, S. Pro-survival and anti-apoptotic properties of androgen  
553 receptor signaling by oxidative stress promote treatment resistance in prostate cancer. *Endocr*  
554 *Relat Cancer* **19**, R243-253, doi:10.1530/ERC-12-0232 (2012).
- 555 45 Lacoste, A., De Cian, M. C., Cueff, A. & Poulet, S. A. Noradrenaline and alpha-adrenergic signaling  
556 induce the hsp70 gene promoter in mollusc immune cells. *J Cell Sci* **114**, 3557-3564 (2001).
- 557 46 Xian, D. *et al.* Emerging Roles of Redox-Mediated Angiogenesis and Oxidative Stress in  
558 Dermatoses. *Oxid Med Cell Longev* **2019**, 2304018, doi:10.1155/2019/2304018 (2019).
- 559 47 Zhao, X. *et al.* Overexpression of Cardiomyocyte alpha1A-Adrenergic Receptors Attenuates  
560 Postinfarct Remodeling by Inducing Angiogenesis Through Heterocellular Signaling. *Arterioscler*  
561 *Thromb Vasc Biol* **35**, 2451-2459, doi:10.1161/ATVBAHA.115.305919 (2015).
- 562 48 Stupack, D. G. & Chersesh, D. A. Get a ligand, get a life: integrins, signaling and cell survival. *J Cell*  
563 *Sci* **115**, 3729-3738, doi:10.1242/jcs.00071 (2002).
- 564 49 Reddy, E. P., Korapati, A., Chaturvedi, P. & Rane, S. IL-3 signaling and the role of Src kinases, JAKs  
565 and STATs: a covert liaison unveiled. *Oncogene* **19**, 2532-2547, doi:10.1038/sj.onc.1203594  
566 (2000).
- 567 50 Young, B., Purcell, C., Kuang, Y. Q., Charette, N. & Dupre, D. J. Superoxide Dismutase 1  
568 Regulation of CXCR4-Mediated Signaling in Prostate Cancer Cells is Dependent on Cellular  
569 Oxidative State. *Cell Physiol Biochem* **37**, 2071-2084, doi:10.1159/000438566 (2015).
- 570 51 Bai, X. C. *et al.* Phospholipase C-gamma1 is required for survival in heat stress: involvement of  
571 protein kinase C-dependent Bcl-2 phosphorylation. *J Biochem* **131**, 207-212,  
572 doi:10.1093/oxfordjournals.jbchem.a003089 (2002).
- 573 52 Parsell, D. & Lindquist, S. The function of heat-shock proteins in stress tolerance: degradation  
574 and reactivation of damaged proteins. *Annual review of genetics* **27**, 437-496 (1993).
- 575 53 Rout, P., Kaushik, R. & Ramachandran, N. Differential expression pattern of heat shock protein  
576 70 gene in tissues and heat stress phenotypes in goats during peak heat stress period. *Cell Stress*  
577 *and Chaperones* **21**, 645-651 (2016).

- 578 54 Westerheide, S. D., Anckar, J., Stevens, S. M., Sistonen, L. & Morimoto, R. I. Stress-inducible  
579 regulation of heat shock factor 1 by the deacetylase SIRT1. *Science* **323**, 1063-1066 (2009).
- 580 55 Prodromou, C. Mechanisms of Hsp90 regulation. *Biochemical Journal* **473**, 2439-2452 (2016).
- 581 56 Holmberg, C. I. *et al.* Phosphorylation of serine 230 promotes inducible transcriptional activity of  
582 heat shock factor 1. *The EMBO journal* **20**, 3800-3810 (2001).
- 583 57 Wang, X., Grammatikakis, N., Siganou, A. & Calderwood, S. K. Regulation of molecular  
584 chaperone gene transcription involves the serine phosphorylation, 14-3-3 $\epsilon$  binding, and  
585 cytoplasmic sequestration of heat shock factor 1. *Molecular and cellular biology* **23**, 6013-6026  
586 (2003).
- 587 58 Ryu, K. Y. *et al.* The mouse polyubiquitin gene UbC is essential for fetal liver development, cell-  
588 cycle progression and stress tolerance. *The EMBO journal* **26**, 2693-2706 (2007).
- 589 59 Lyzenga, W. J. & Stone, S. L. Abiotic stress tolerance mediated by protein ubiquitination. *Journal*  
590 *of experimental botany* **63**, 599-616 (2011).
- 591 60 Sulistio, Y. A. & Heese, K. The ubiquitin-proteasome system and molecular chaperone  
592 deregulation in Alzheimer's disease. *Molecular neurobiology* **53**, 905-931 (2016).
- 593 61 Fernández-Fernández, M. R., Gragera, M., Ochoa-Ibarrola, L., Quintana-Gallardo, L. & Valpuesta,  
594 J. M. Hsp70—a master regulator in protein degradation. *FEBS letters* **591**, 2648-2660 (2017).
- 595 62 Pabarcus, M. K. *et al.* CYP3A4 ubiquitination by gp78 (the tumor autocrine motility factor  
596 receptor, AMFR) and CHIP E3 ligases. *Archives of biochemistry and biophysics* **483**, 66-74 (2009).
- 597 63 David, Y., Ziv, T., Admon, A. & Navon, A. The E2 ubiquitin-conjugating enzymes direct  
598 polyubiquitination to preferred lysines. *Journal of Biological Chemistry* **285**, 8595-8604 (2010).
- 599 64 Sheng, Y. *et al.* A human ubiquitin conjugating enzyme (E2)-HECT E3 ligase structure-function  
600 screen. *Molecular & Cellular Proteomics* **11**, 329-341 (2012).
- 601 65 Kaiser, P. *et al.* A human ubiquitin-conjugating enzyme homologous to yeast UBC8. *Journal of*  
602 *Biological Chemistry* **269**, 8797-8802 (1994).
- 603 66 Li, M. *et al.* Deubiquitination of p53 by HAUSP is an important pathway for p53 stabilization.  
604 *Nature* **416**, 648 (2002).
- 605 67 Zhao, Y. *et al.* Noncanonical regulation of alkylation damage resistance by the OTUD4  
606 deubiquitinase. *The EMBO journal* **34**, 1687-1703 (2015).
- 607 68 Kadowaki, H. *et al.* Pre-emptive quality control protects the ER from protein overload via the  
608 proximity of ERAD components and SRP. *Cell reports* **13**, 944-956 (2015).
- 609 69 Hori, O. *et al.* Deletion of SERP1/RAMP4, a component of the endoplasmic reticulum (ER)  
610 translocation sites, leads to ER stress. *Molecular and cellular biology* **26**, 4257-4267 (2006).
- 611 70 Nauseef, W. M., McCormick, S. J. & Clark, R. A. Calreticulin functions as a molecular chaperone  
612 in the biosynthesis of myeloperoxidase. *Journal of Biological Chemistry* **270**, 4741-4747 (1995).
- 613 71 O'Connor, L. *et al.* Bim: a novel member of the Bcl-2 family that promotes apoptosis. *The EMBO*  
614 *journal* **17**, 384-395 (1998).
- 615 72 Marani, M., Tenev, T., Hancock, D., Downward, J. & Lemoine, N. R. Identification of novel  
616 isoforms of the BH3 domain protein Bim which directly activate Bax to trigger apoptosis.  
617 *Molecular and cellular biology* **22**, 3577-3589 (2002).
- 618 73 Muneta, Y., Shimoji, Y., Inumaru, S. & Mori, Y. Molecular cloning, characterization, and  
619 expression of porcine Fas ligand (CD95 Ligand). *Journal of Interferon & Cytokine Research* **21**,  
620 305-312 (2001).
- 621 74 Ruiz-García, R. *et al.* Decreased activation-induced cell death by EBV-transformed B-cells from a  
622 patient with autoimmune lymphoproliferative syndrome caused by a novel FASLG mutation.  
623 *Pediatric research* **78**, 603 (2015).

- 624 75 Nicholson, D. W. *et al.* Identification and inhibition of the ICE/CED-3 protease necessary for  
625 mammalian apoptosis. *Nature* **376**, 37 (1995).
- 626 76 Dai, R., Frejtag, W., He, B., Zhang, Y. & Mivechi, N. F. c-Jun NH2-terminal kinase targeting and  
627 phosphorylation of heat shock factor-1 suppress its transcriptional activity. *Journal of Biological*  
628 *Chemistry* **275**, 18210-18218 (2000).
- 629 77 Cao, W.-X. *et al.* MLKL mediates apoptosis via a mutual regulation with PERK/eIF2 $\alpha$  pathway in  
630 response to reactive oxygen species generation. *Apoptosis* **23**, 521-531 (2018).
- 631 78 Lu, X.-X. *et al.* PTEN inhibits cell proliferation, promotes cell apoptosis, and induces cell cycle  
632 arrest via downregulating the PI3K/AKT/hTERT pathway in lung adenocarcinoma A549 cells.  
633 *BioMed research international* **2016** (2016).
- 634 79 Chen, C.-Y., Chen, J., He, L. & Stiles, B. L. PTEN: tumor suppressor and metabolic regulator.  
635 *Frontiers in endocrinology* **9** (2018).
- 636 80 Lee, Y. S. *et al.* Dysregulation of adipose glutathione peroxidase 3 in obesity contributes to local  
637 and systemic oxidative stress. *Molecular Endocrinology* **22**, 2176-2189 (2008).
- 638 81 Bierl, C., Voetsch, B., Jin, R. C., Handy, D. E. & Loscalzo, J. Determinants of human plasma  
639 glutathione peroxidase (GPx-3) expression. *Journal of Biological Chemistry* **279**, 26839-26845  
640 (2004).
- 641 82 Ighodaro, O. & Akinloye, O. First line defence antioxidants-superoxide dismutase (SOD), catalase  
642 (CAT) and glutathione peroxidase (GPX): Their fundamental role in the entire antioxidant  
643 defence grid. *Alexandria Journal of Medicine* **54**, 287-293 (2018).
- 644 83 Tsuji, K., Copeland, N., Jenkins, N. & Obinata, M. Mammalian antioxidant protein complements  
645 alkylhydroperoxide reductase (ahpC) mutation in Escherichia coli. *Biochemical Journal* **307**, 377-  
646 381 (1995).
- 647 84 Yamashita, H. *et al.* Characterization of human and murine PMP20 peroxisomal proteins that  
648 exhibit antioxidant activity in vitro. *Journal of Biological Chemistry* **274**, 29897-29904 (1999).
- 649 85 Knoop, B. *et al.* Cloning and characterization of AOEB166, a novel mammalian antioxidant  
650 enzyme of the peroxiredoxin family. *Journal of Biological Chemistry* **274**, 30451-30458 (1999).
- 651 86 Kang, S. W., Baines, I. C. & Rhee, S. G. Characterization of a mammalian peroxiredoxin that  
652 contains one conserved cysteine. *Journal of Biological Chemistry* **273**, 6303-6311 (1998).
- 653 87 Chen, J.-W., Dodia, C., Feinstein, S. I., Jain, M. K. & Fisher, A. B. 1-Cys peroxiredoxin, a  
654 bifunctional enzyme with glutathione peroxidase and phospholipase A2 activities. *Journal of*  
655 *Biological Chemistry* **275**, 28421-28427 (2000).
- 656 88 Schmieider, R. & Edwards, R. Quality control and preprocessing of metagenomic datasets.  
657 *Bioinformatics* **27**, 863-864 (2011).
- 658 89 Cunningham, F. *et al.* Ensembl 2015. *Nucleic acids research* **43**, D662-D669 (2014).
- 659 90 Li, B. & Dewey, C. N. RSEM: accurate transcript quantification from RNA-Seq data with or  
660 without a reference genome. *BMC bioinformatics* **12**, 323 (2011).
- 661 91 Langmead, B. & Salzberg, S. L. Fast gapped-read alignment with Bowtie 2. *Nature methods* **9**,  
662 357 (2012).
- 663 92 Robinson, M. D., McCarthy, D. J. & Smyth, G. K. edgeR: a Bioconductor package for differential  
664 expression analysis of digital gene expression data. *Bioinformatics* **26**, 139-140 (2010).
- 665 93 Reimand, J., Kull, M., Peterson, H., Hansen, J. & Vilo, J. g: Profiler—a web-based toolset for  
666 functional profiling of gene lists from large-scale experiments. *Nucleic acids research* **35**, W193-  
667 W200 (2007).
- 668 94 Reimand, J. *et al.* g: Profiler—a web server for functional interpretation of gene lists (2016  
669 update). *Nucleic acids research* **44**, W83-W89 (2016).



- 670 95 Gu, Z. *et al.* Heat stress induced apoptosis is triggered by transcription-independent p53, Ca<sup>2+</sup>  
671 dyshomeostasis and the subsequent Bax mitochondrial translocation. *Scientific reports* **5**, 11497  
672 (2015).
- 673 96 Li, L. *et al.* Heat stress induces apoptosis through a Ca<sup>2+</sup>-mediated mitochondrial apoptotic  
674 pathway in human umbilical vein endothelial cells. *PLoS one* **9**, e111083 (2014).
- 675 97 Kelly, S. M., VanSlyke, J. K. & Musil, L. S. Regulation of Ubiquitin-Proteasome System-mediated  
676 Degradation by Cytosolic Stress. *Molecular biology of the cell* **18**, 4279-4291 (2007).
- 677 98 Flick, K. & Kaiser, P. in *Seminars in cell & developmental biology*. 515-522 (Elsevier).
- 678 99 Homma, T. & Fujii, J. Heat stress promotes the down-regulation of IRE1 $\alpha$  in cells: An atypical  
679 modulation of the UPR pathway. *Experimental cell research* **349**, 128-138 (2016).
- 680 100 Belhadj Slimen, I. *et al.* Reactive oxygen species, heat stress and oxidative-induced  
681 mitochondrial damage. A review. *International journal of hyperthermia* **30**, 513-523 (2014).
- 682 101 Yang, L., Tan, G.-Y., Fu, Y.-Q., Feng, J.-H. & Zhang, M.-H. Effects of acute heat stress and  
683 subsequent stress removal on function of hepatic mitochondrial respiration, ROS production  
684 and lipid peroxidation in broiler chickens. *Comparative Biochemistry and Physiology Part C:  
685 Toxicology & Pharmacology* **151**, 204-208 (2010).
- 686 102 Fabregat, A. *et al.* The reactome pathway knowledgebase. *Nucleic acids research* **46**, D649-D655  
687 (2017).
- 688 103 Szklarczyk, D. *et al.* STRING v11: protein-protein association networks with increased coverage,  
689 supporting functional discovery in genome-wide experimental datasets. *Nucleic acids research*  
690 **47**, D607-D613 (2018).
- 691 104 Shannon, P. *et al.* Cytoscape: a software environment for integrated models of biomolecular  
692 interaction networks. *Genome research* **13**, 2498-2504 (2003).
- 693 105 Krämer, A., Green, J., Pollard Jr, J. & Tugendreich, S. Causal analysis approaches in ingenuity  
694 pathway analysis. *Bioinformatics* **30**, 523-530 (2013).
- 695 106 Schmittgen, T. D. & Livak, K. J. Analyzing real-time PCR data by the comparative C<sub>T</sub> method.  
696 *Nature protocols* **3**, 1101 (2008).
- 697

698

699

## 700 **Legends**

701 **Figure 1:** Overview of the work done : Two genetic groups (Tharparkar and Crossbred) of cattle  
702 were exposed to a temperature of 42 °C for 7 days. Heat stress indicators - Respiration rate (RR),  
703 Rectal temperature and T3 level before exposure to heat (0day – control group) and at 7<sup>th</sup> day of  
704 exposure (treated) were measured to evaluate heat stress. At these time points, RNA was isolated  
705 from PBMCs for high throughput sequencing. Transcriptome analysis was done to identify  
706 differentially expressed genes (DEGs) under heat treatment in both genetic groups. Genes  
707 involved in physiological processes (heat stress response, apoptosis, ubiquitination, unfolded  
708 protein response and antioxidant level) that are commonly associated with heat stress were

709 compared between the two genetic groups. Further, functional annotation of DEGs was done  
710 using IPA.

711 **Figure 2:** Respiration rate, Rectal Temperature and T3 level measured at 0 day (control) and 7  
712 day post-heat exposure (treated) in Crossbred and Tharparkar (n=5) Levels sharing the same  
713 superscript are not significantly ( $P > 0.05$ ) different from each other.

714 **Figure 3:** Expression of DEGs in Crossbred and Tharparkar under heat stress: (a) Venn diagrams  
715 showing unique/common DEGs between Crossbred and Tharparkar (b) Number of upregulated  
716 and downregulated in both genetic groups (c) Contrast in the expression of common DEGs

717 **Figure 4:** Contrast in the expression of genes involved in heat stress response, apoptosis,  
718 ubiquitination, unfolded protein response and balance in the production of ROS and antioxidants  
719 between two genetic groups.

720 **Figure 5 :** Canonical pathways activated/inactivated in (a) Crossbred (b) Tharparkar under heat  
721 stress generated in the core analysis of Ingenuity pathway analysis tool. Orange color pathways  
722 are activated ( $Z > 2$ ) and blue color pathways are inactivated ( $Z < -2$ ). Height of the bar graphs  
723 indicates  $-\log(p\text{-value})$  and line graph showing the ratio of list genes found in each pathway over  
724 the total number of genes in that pathway.

725 **Figure 6:** Canonical pathways generated in Ingenuity Pathway Analysis of Oncostatin M  
726 signaling pathway of DEGs in (A) Crossbred, (B) Tharparkar. Genes that were upregulated are  
727 shown in red and downregulated in green. The intensity of red and green corresponds to an  
728 increase and decrease, respectively, in Log2 fold change. Genes in grey were not significantly  
729 dysregulated and those in white are not present in the dataset but have been incorporated in the  
730 network through the relationship with other molecules by IPA.

731 **Figure 7:** Canonical pathways generated in Ingenuity Pathway Analysis of PTEN signaling  
732 pathway of DEGs in (A) Crossbred, (B) Tharparkar. Genes that were upregulated are shown in  
733 red and downregulated in green. The intensity of red and green corresponds to an increase and  
734 decrease, respectively, in Log2 fold change. Genes in grey were not significantly dysregulated  
735 and those in white are not present in the dataset but have been incorporated in the network  
736 through the relationship with other molecules by IPA.

737 **Figure 8: Predicted interplay of molecules that is underway during heat stress in both**  
738 **groups :** Heat stress causes unfolding of native proteins. HSP70 acts as a chaperone to facilitate  
739 refolding to restore the structure of unfolded proteins. Under normal condition, HSP70 is bound  
740 to HSF1 thereby preventing HSF1 to promote transcription of HSP70. Under heat stress ATP  
741 binds to the HSP70 and HSF1 complex to release HSF1, promoting the binding of the unfolded  
742 protein to HSP70 and ATP. CAMK2D that induces the transcription of HSP70 via HSF1 was  
743 found downregulated in Tharparkar. GSK3A that inhibits the trimerization of HSF1 that is  
744 needed for the induction of HSP70 expression was found upregulated in Tharparkar. The  
745 decreased level of HSP70 in Crossbred makes it inevitable that such negative feedbacks would  
746 further reduce its level and GSK3A was found downregulated and CAMK2D, upregulated.  
747 Further, in Tharparkar, HSP70 tends to activate ubiquitination pathway to decrease the  
748 accumulation of unfolded proteins that can't be refolded by it. This pathway activation is  
749 supported by upregulation of E3 ligases (UBE2G1, UBE2S, and UBE2H) in Tharparkar.  
750 However, the E3 ligase in Crossbred was found downregulated. With HSP70 being upregulated  
751 and having cytoprotection activity, Tharparkar shows the decline in apoptosis as compared to  
752 Crossbred. This is supported by downregulation of BCL2L11, FASLG, MLKL, CASP3,  
753 MAPK8 and VIM in Tharparkar and vice-versa. Besides, higher expression of the antioxidants  
754 (SOD, CAT, GPX) in Tharparkar enables it to cope up with higher levels of free radicals  
755 generated as a result of heat stress while Crossbred is unable to do so. Green arrow indicates  
756 downregulation and Maroon arrow indicates upregulation.

757

758

759

760

761

762

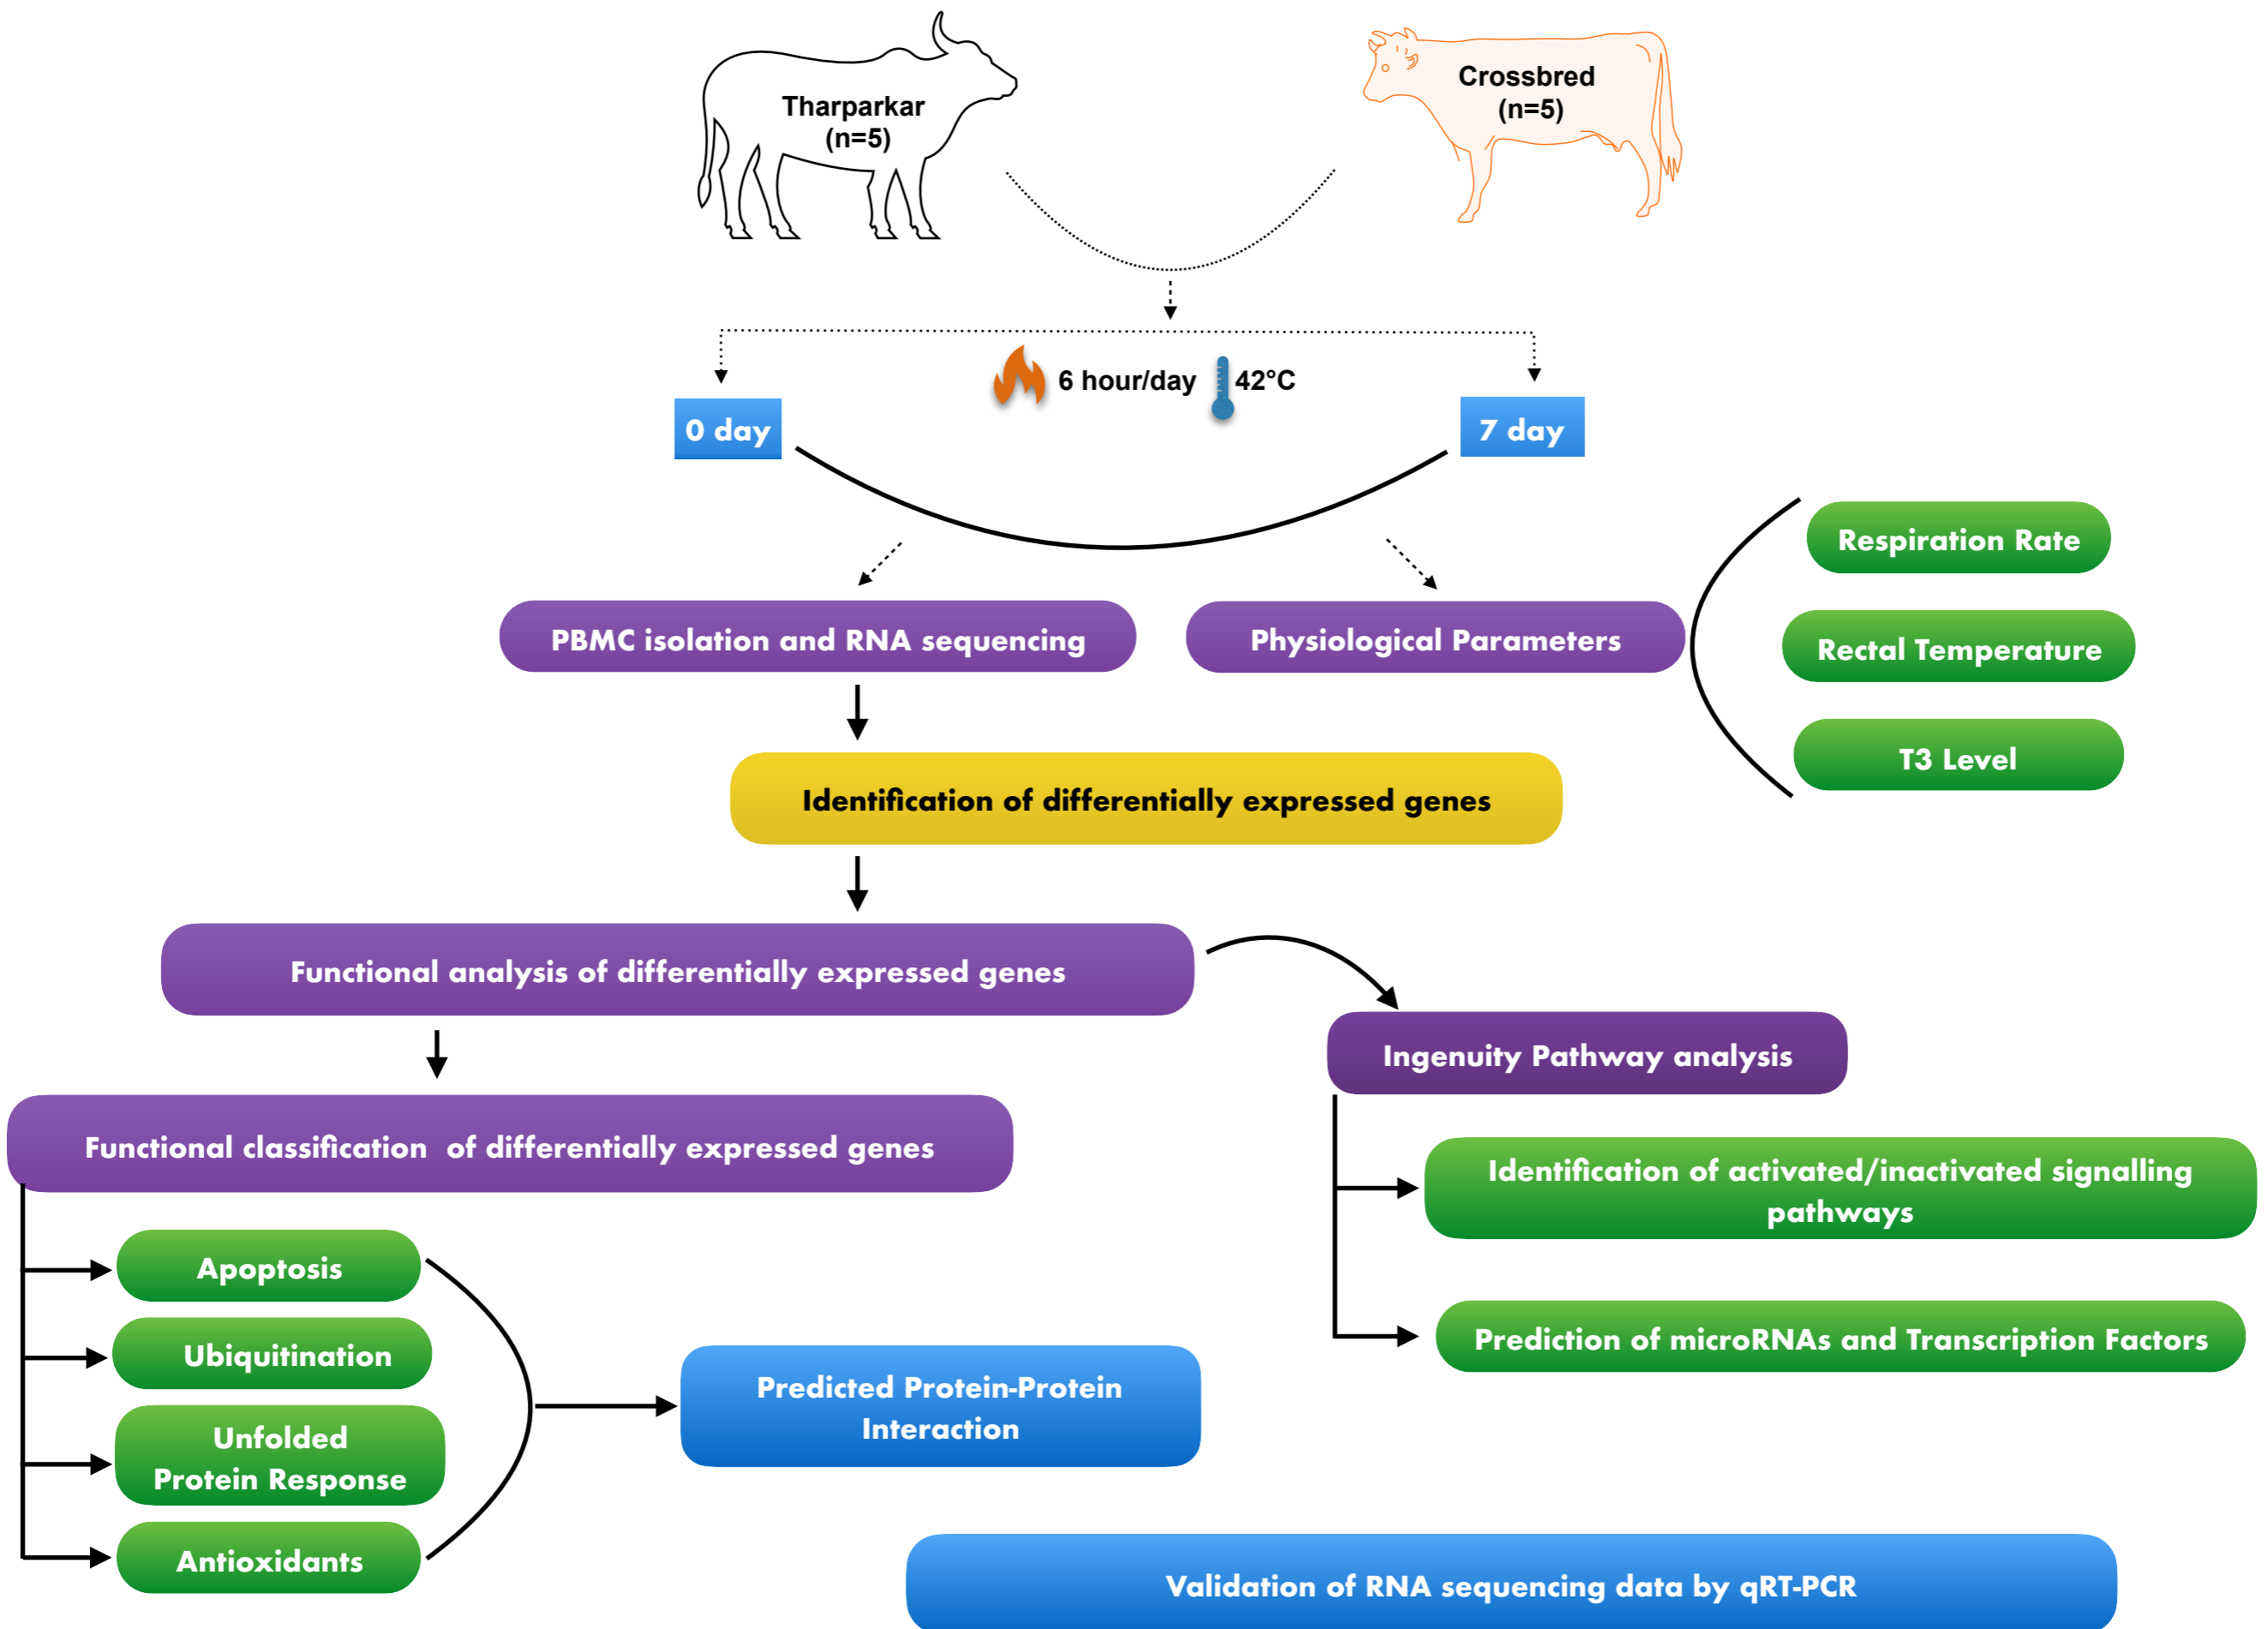

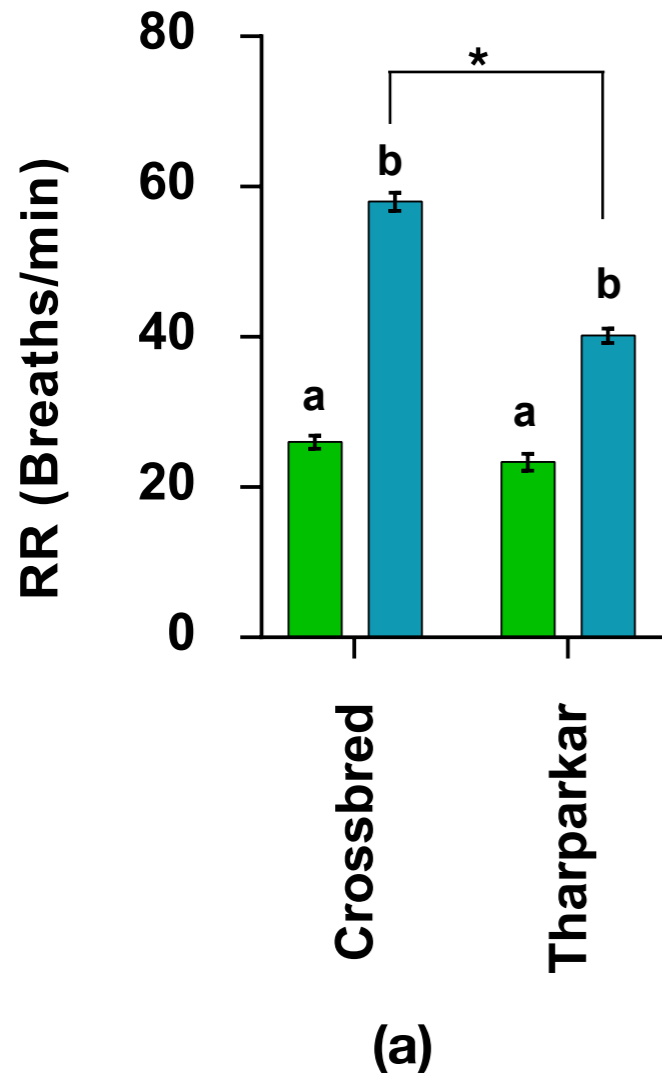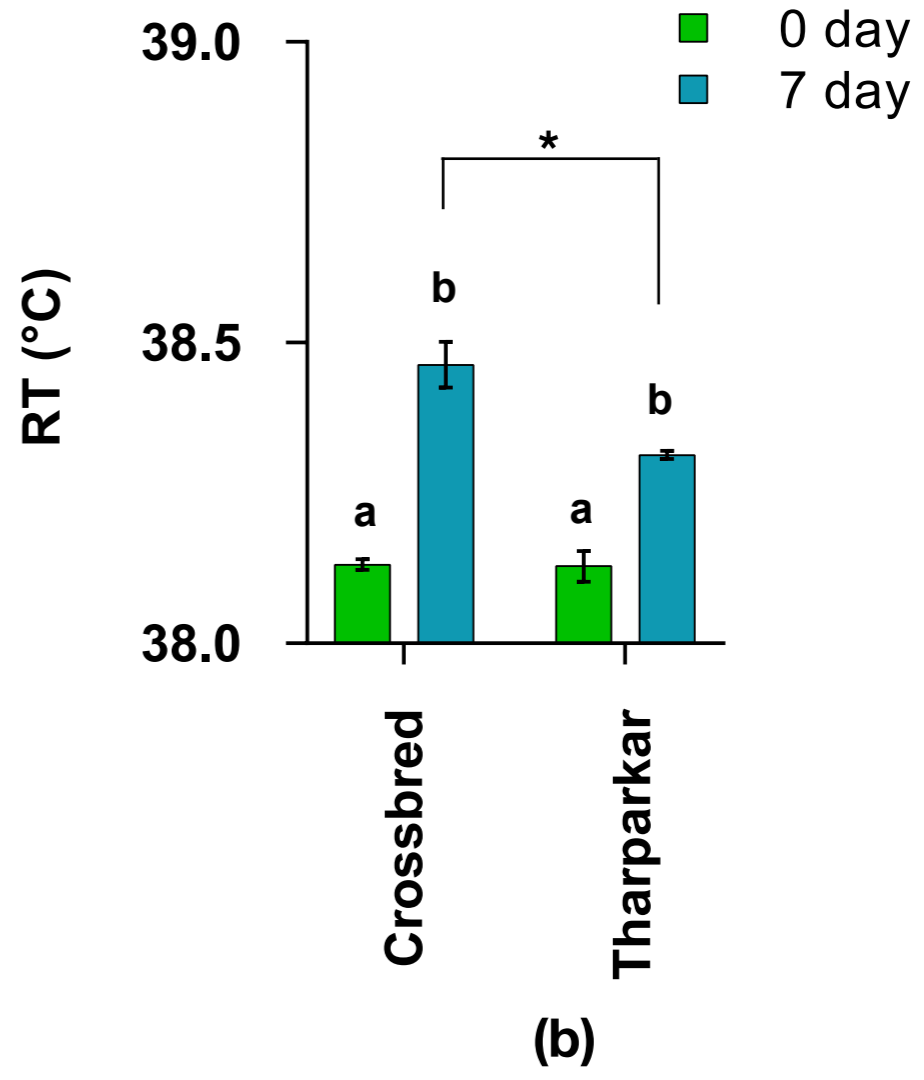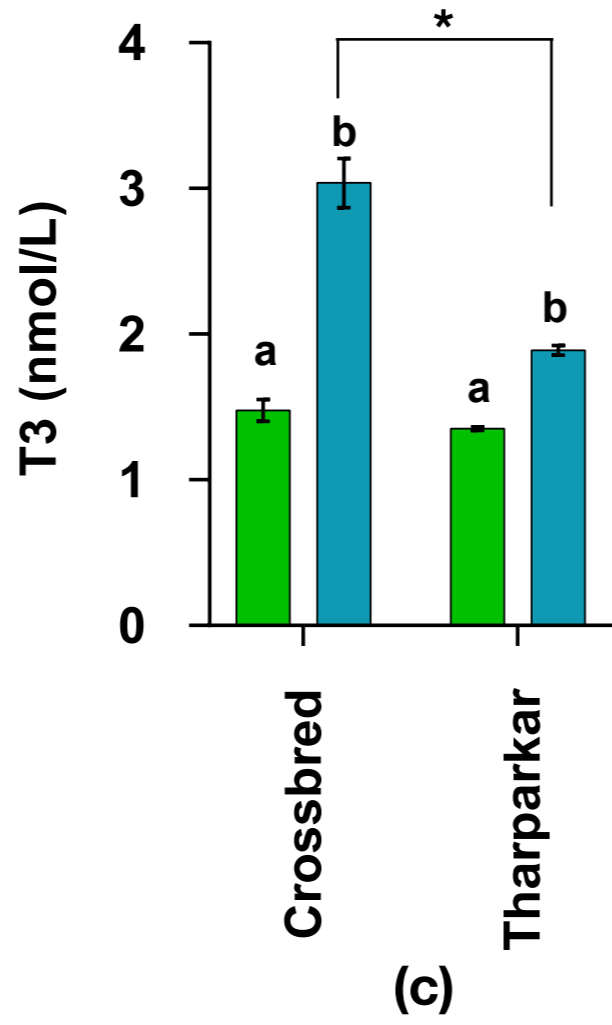

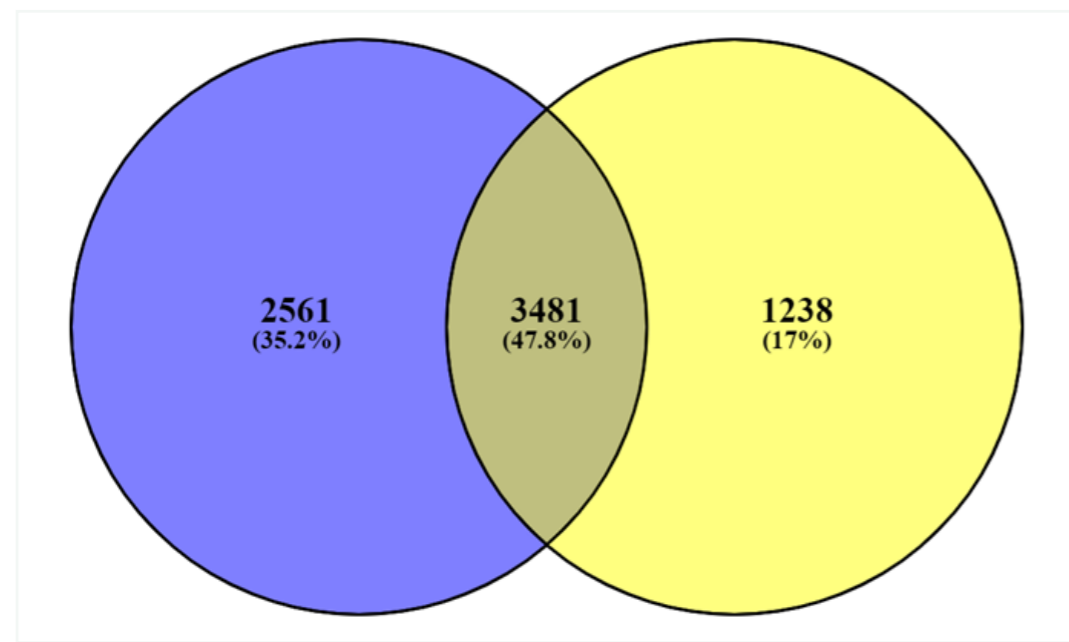

Crossbred\_DEGs

Tharparkar\_DEGs

(a)

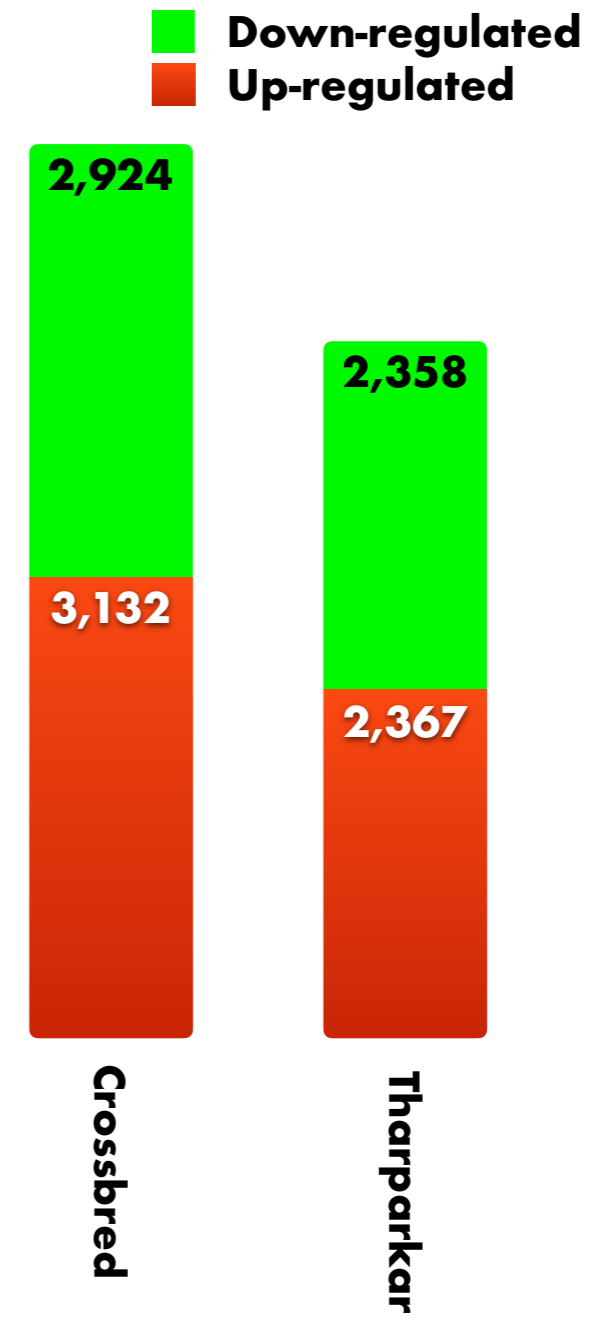

(b)

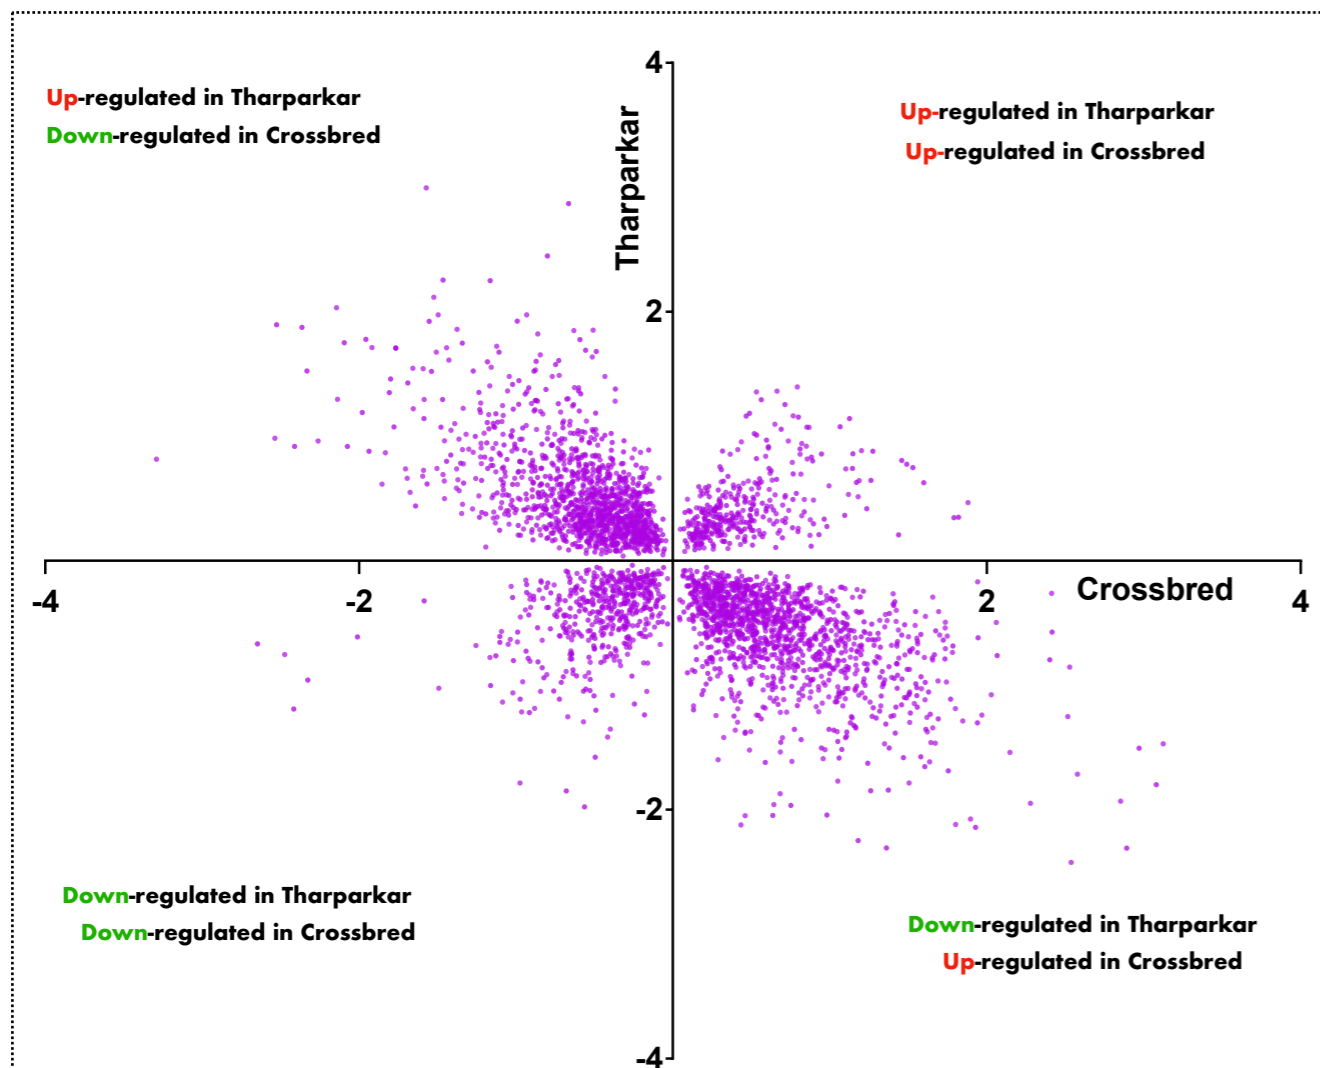

(c)



bioRxiv preprint doi: <https://doi.org/10.1101/2020.04.09.031153>; this version posted July 15, 2020. The copyright holder for this preprint (which was not certified by peer review) is the author/funder. All rights reserved. No reuse allowed without permission.

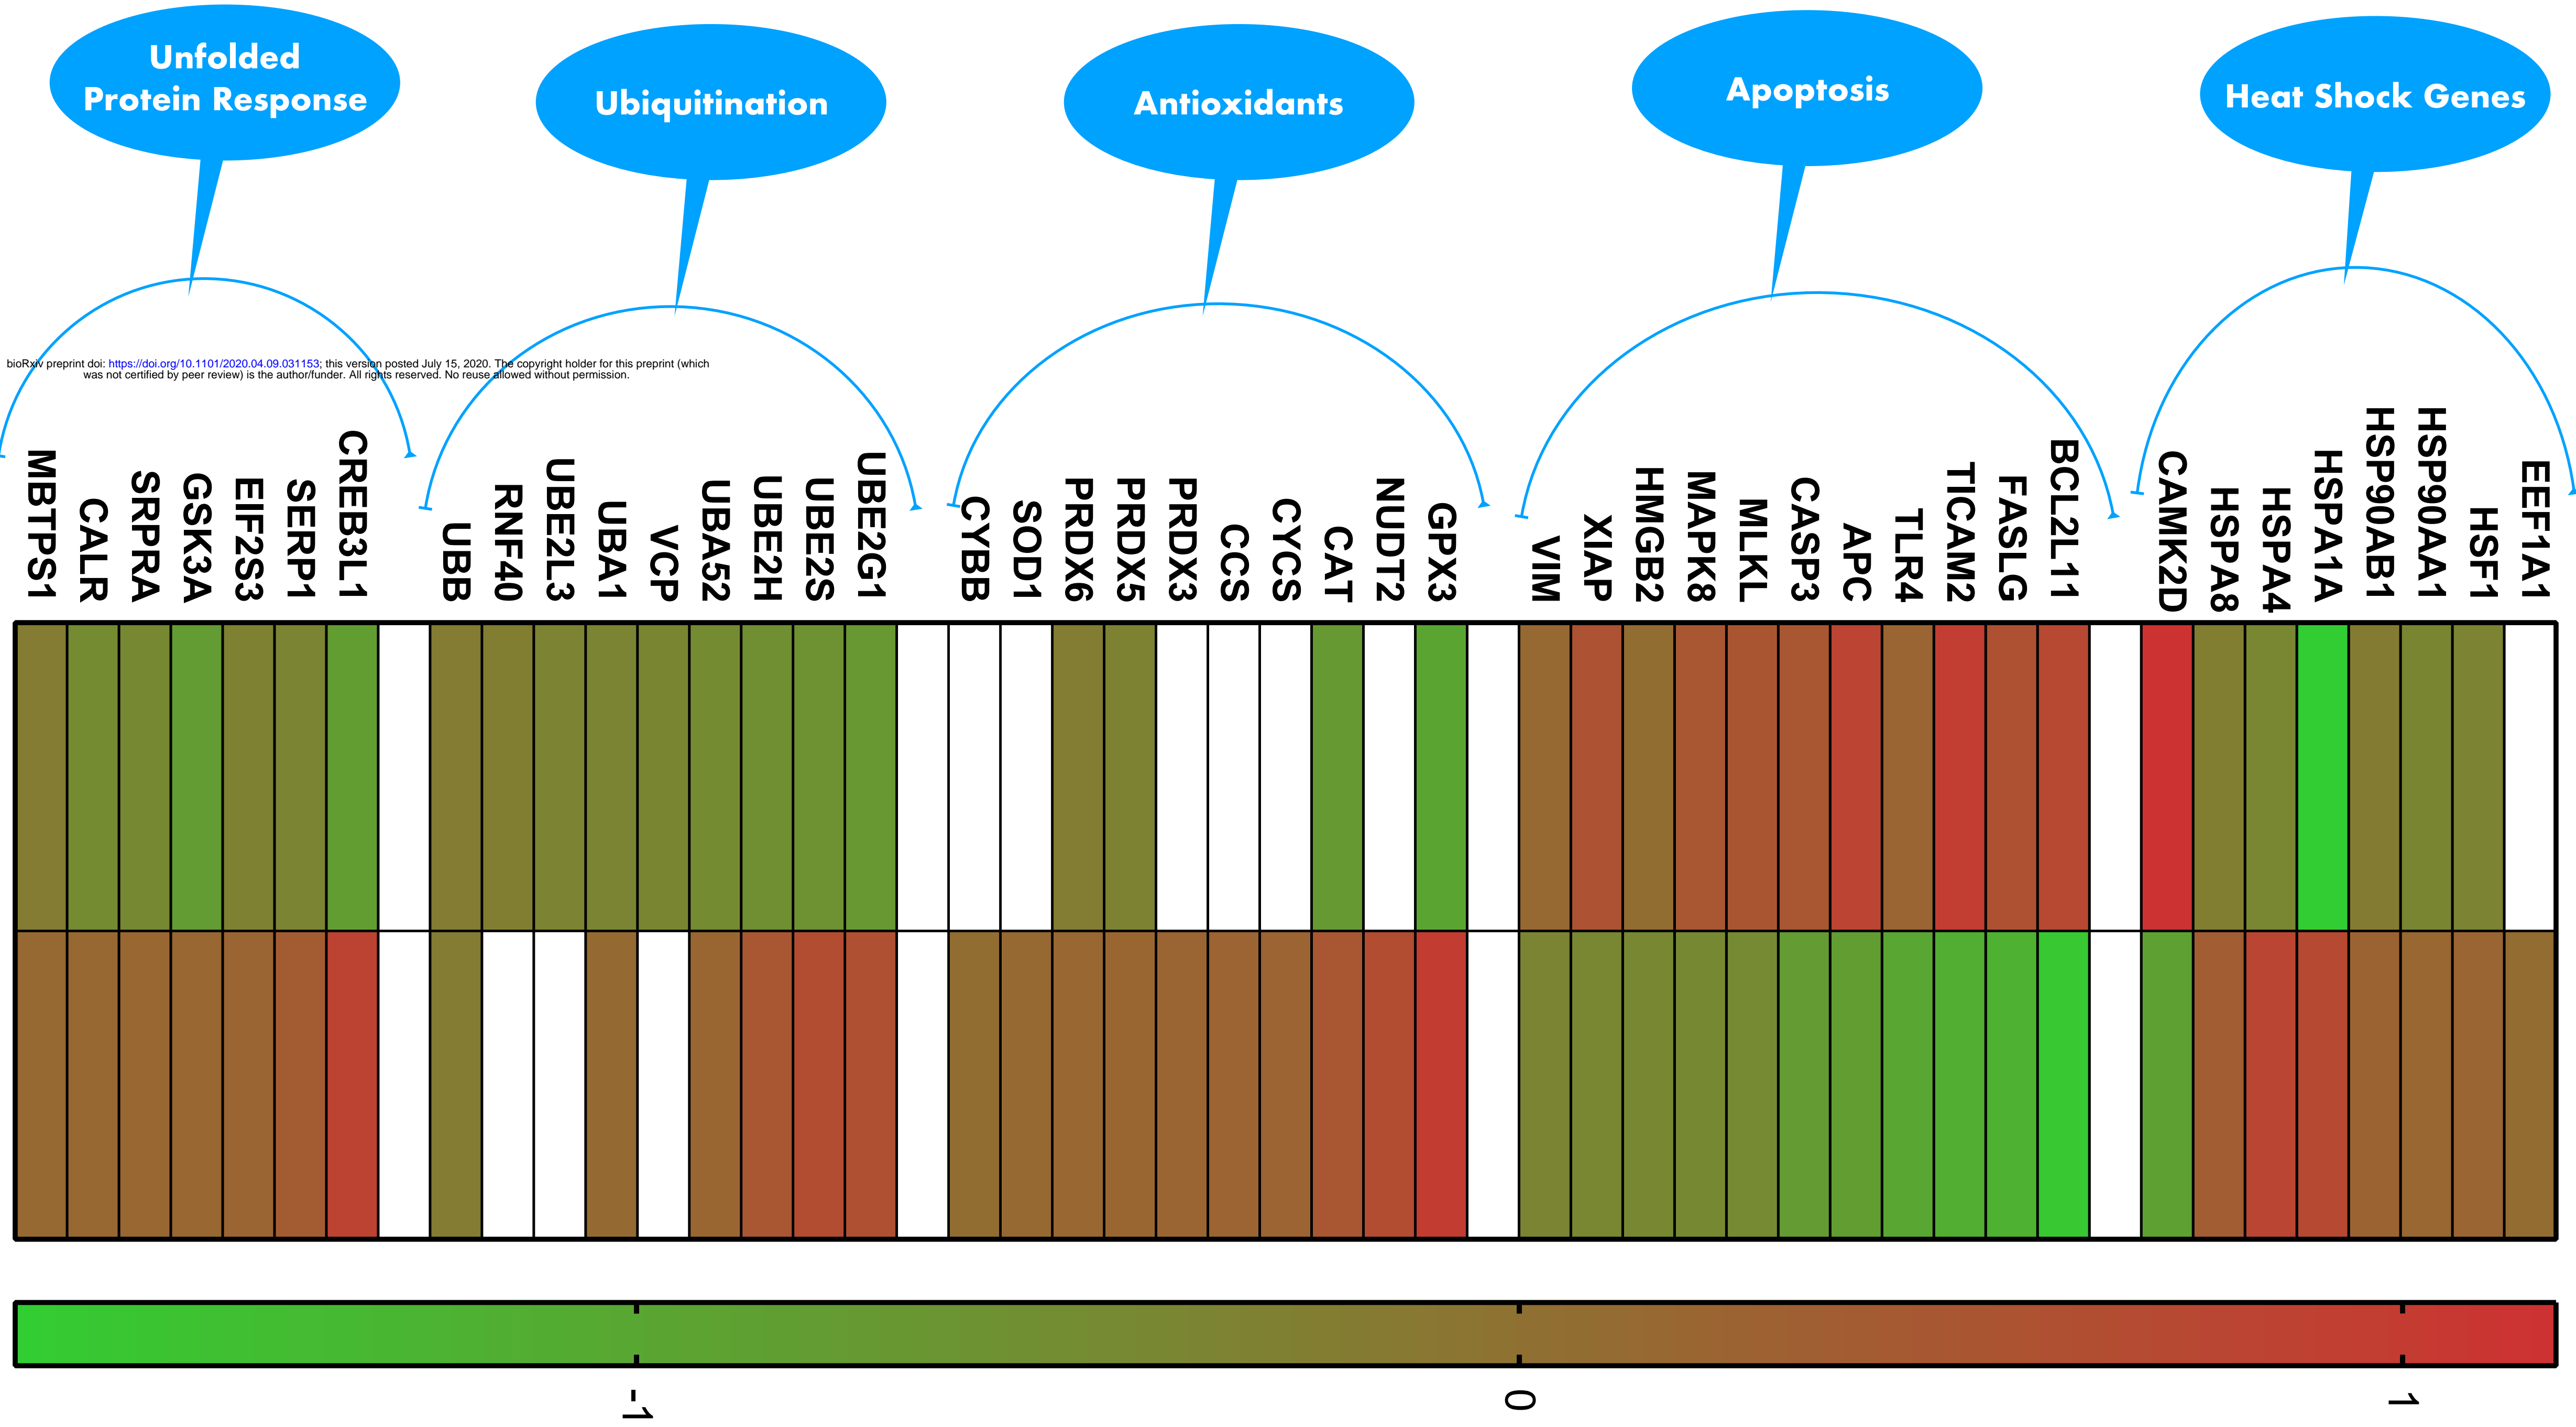

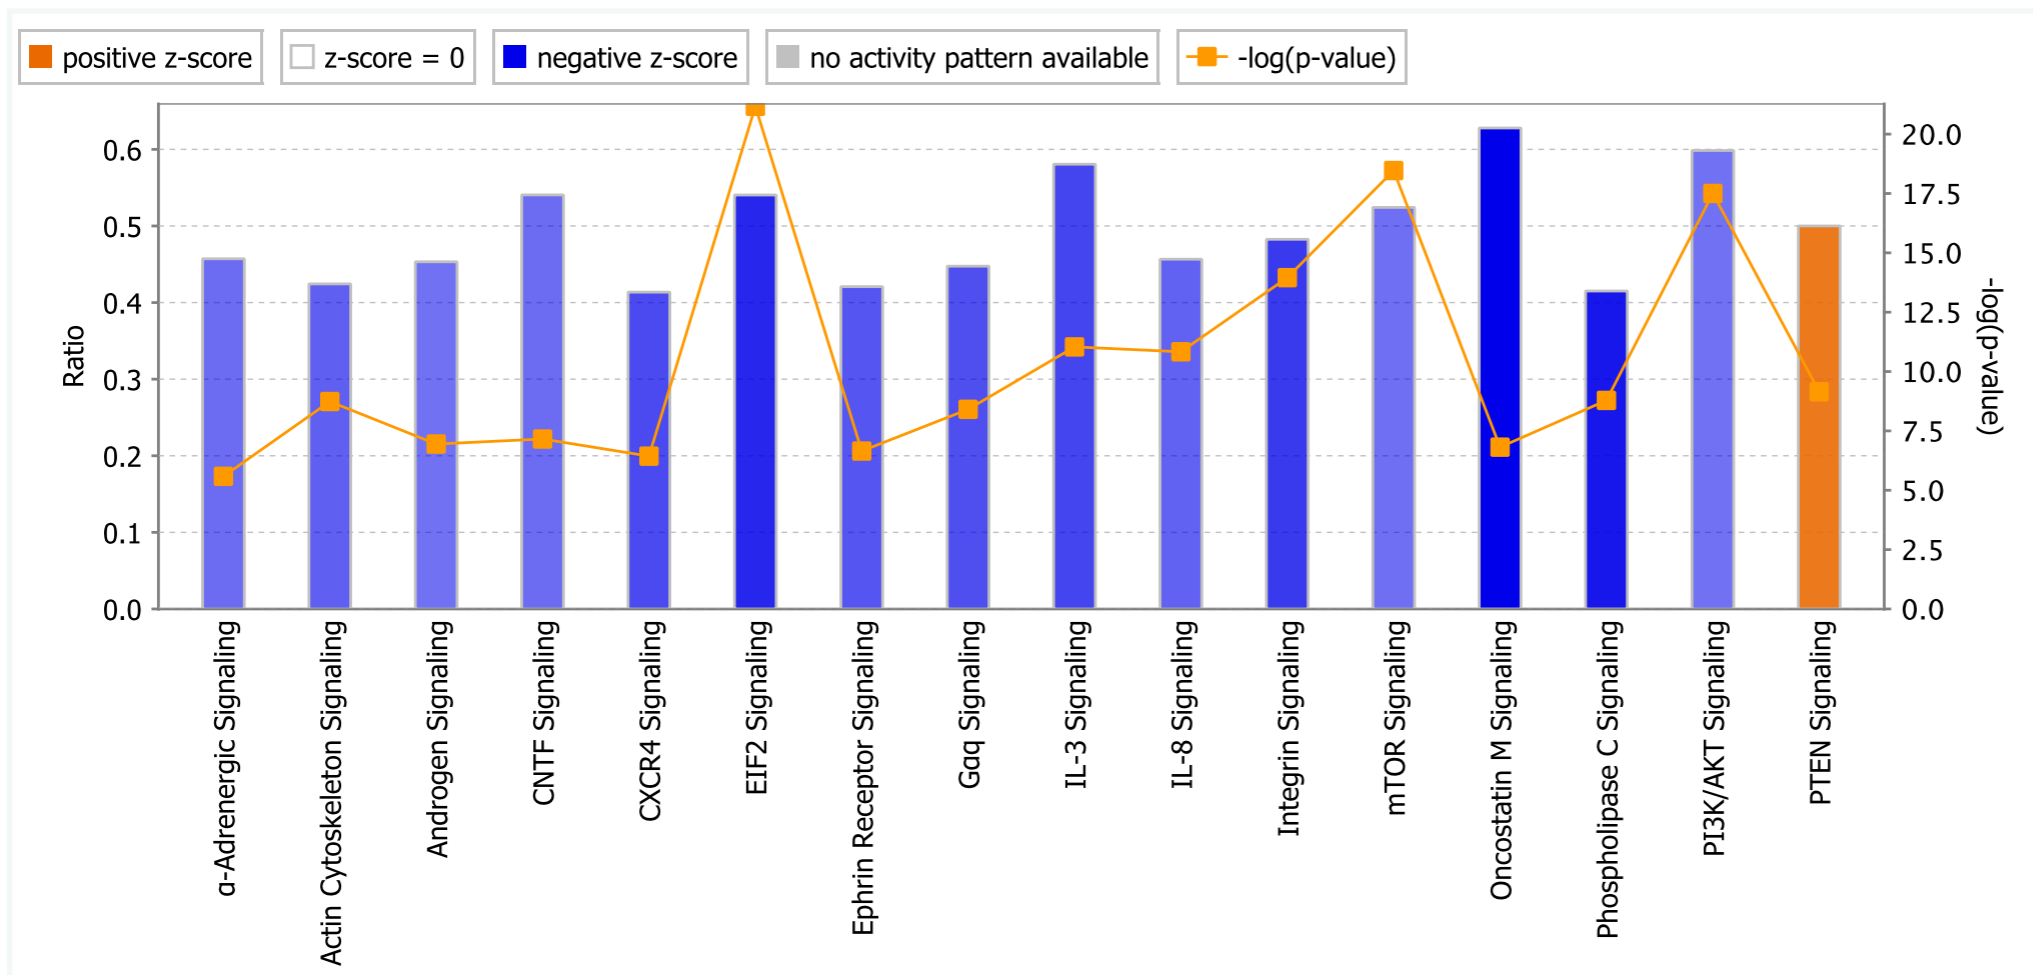

(a)

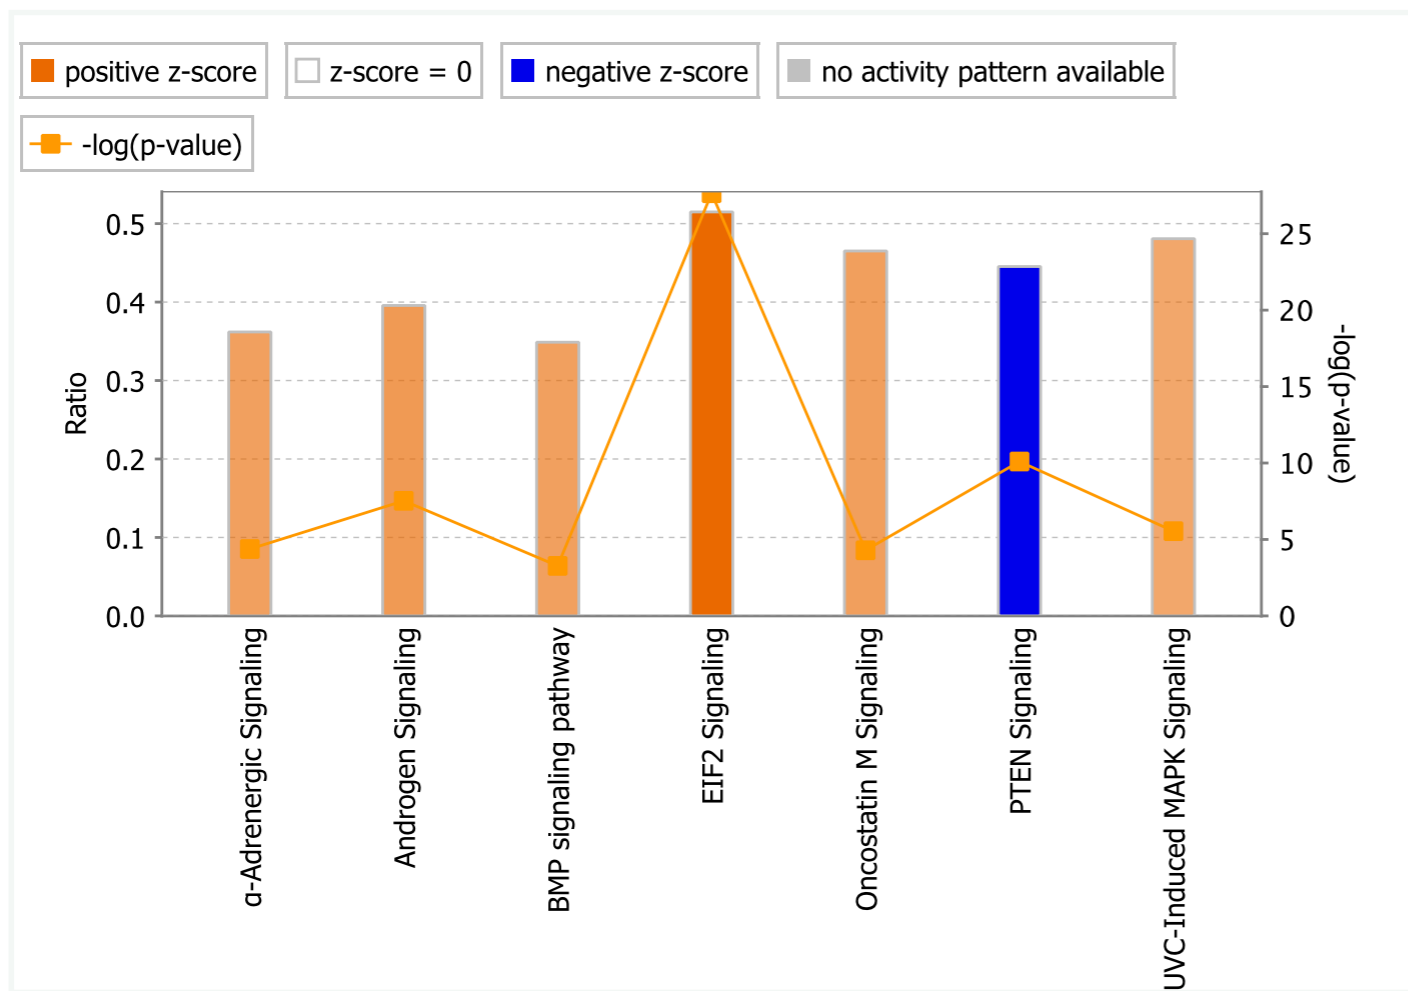

(b)

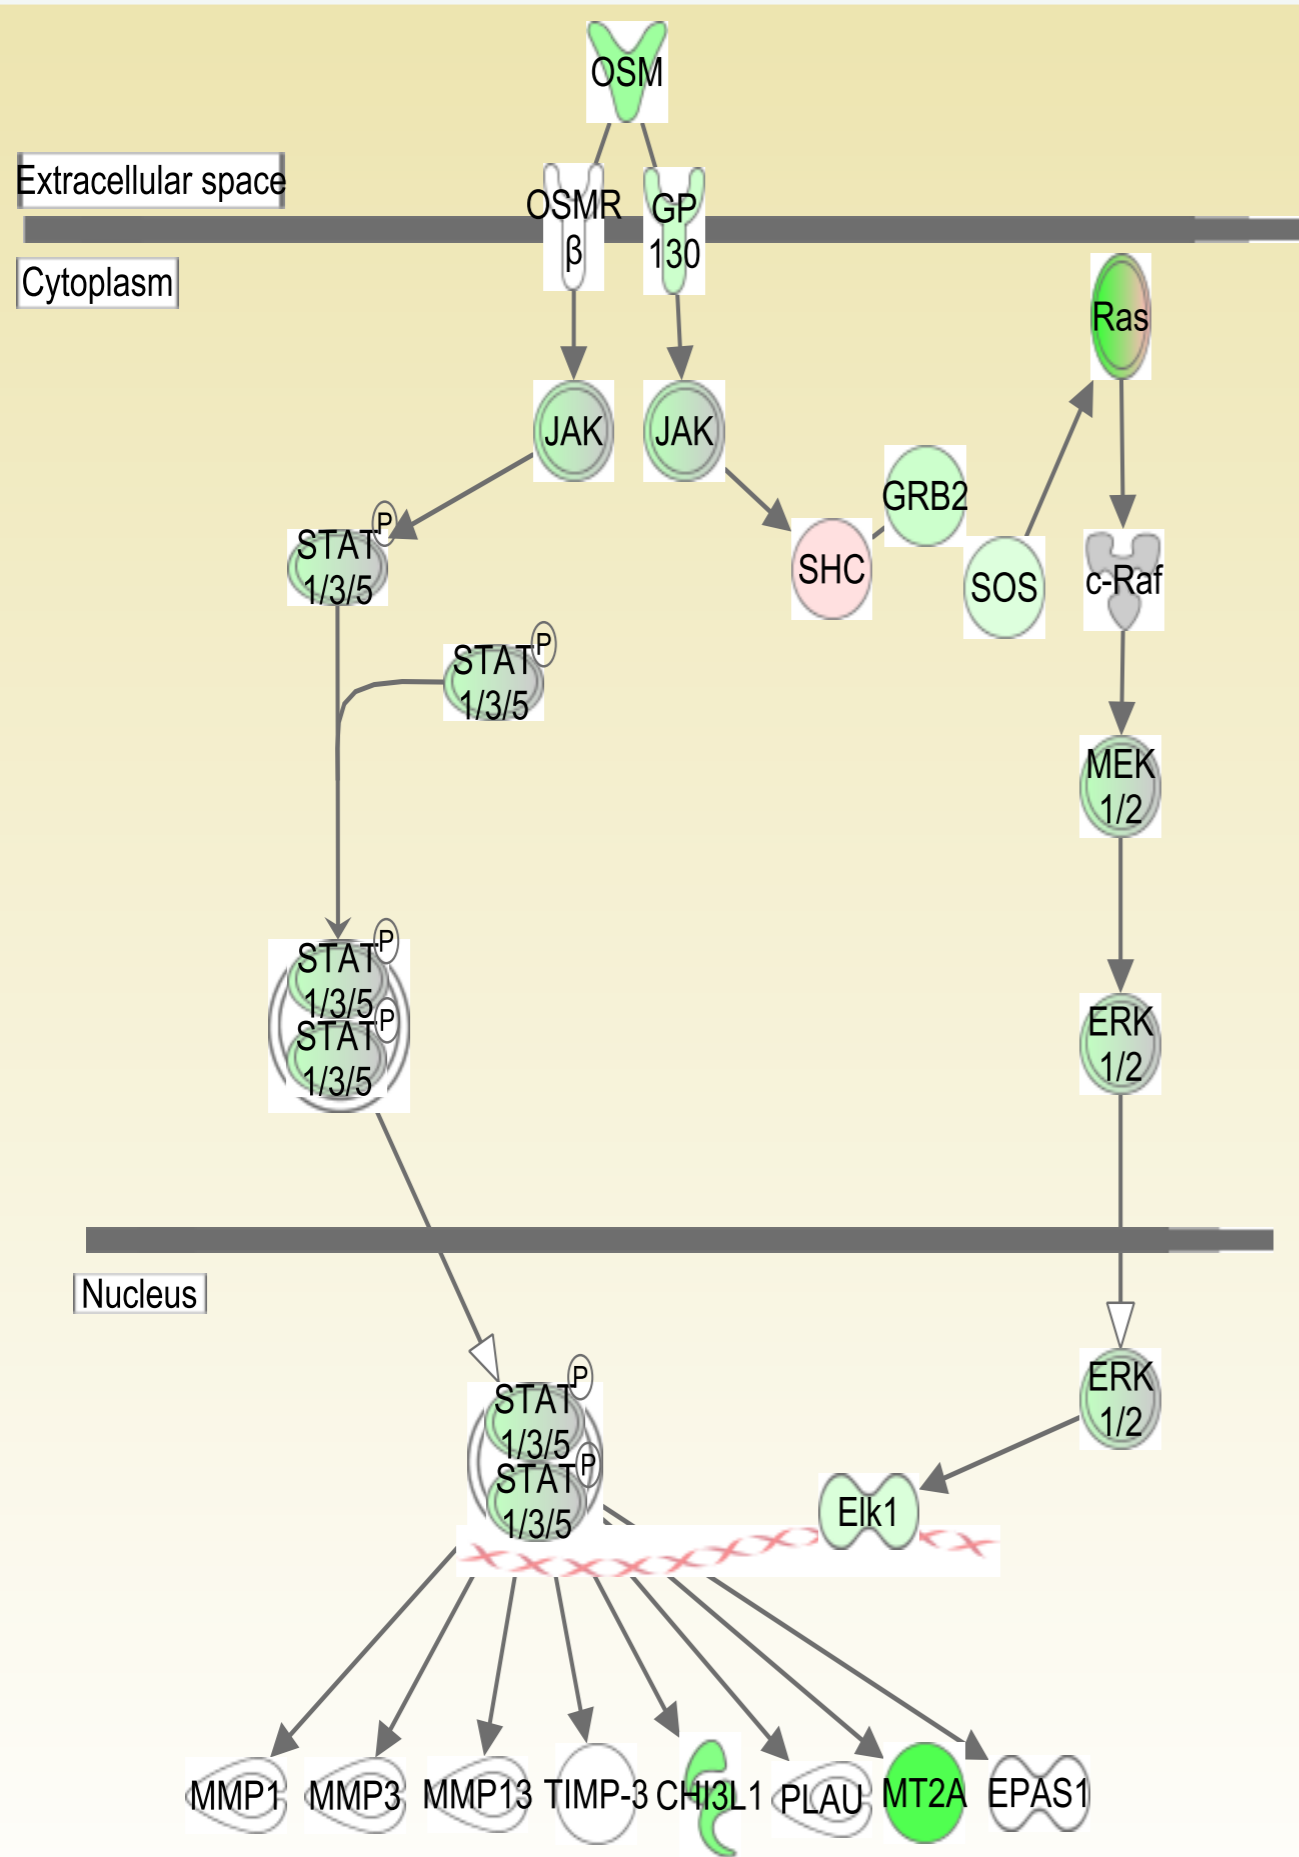

(a)

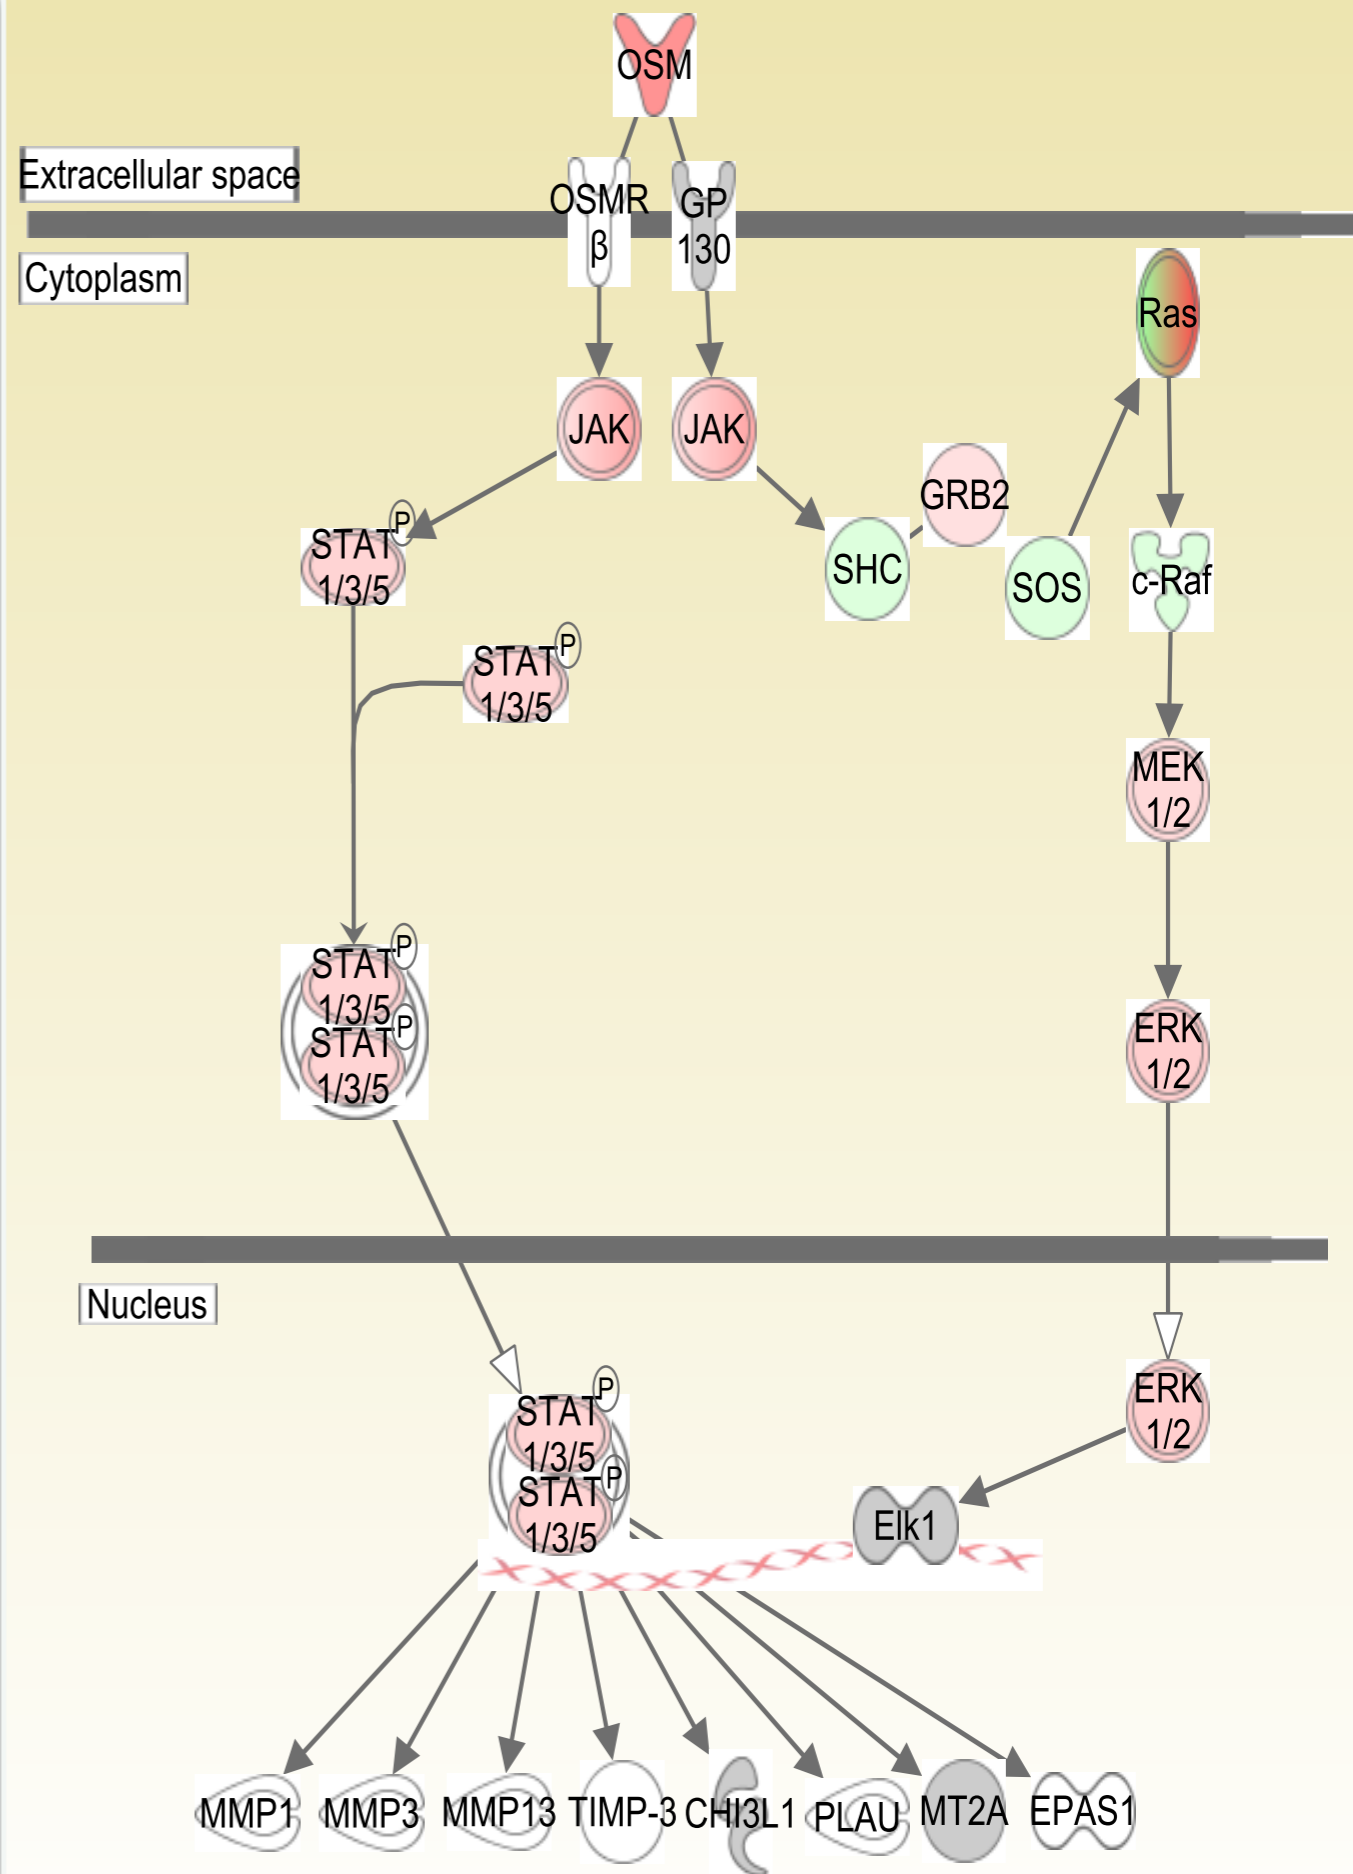

(b)

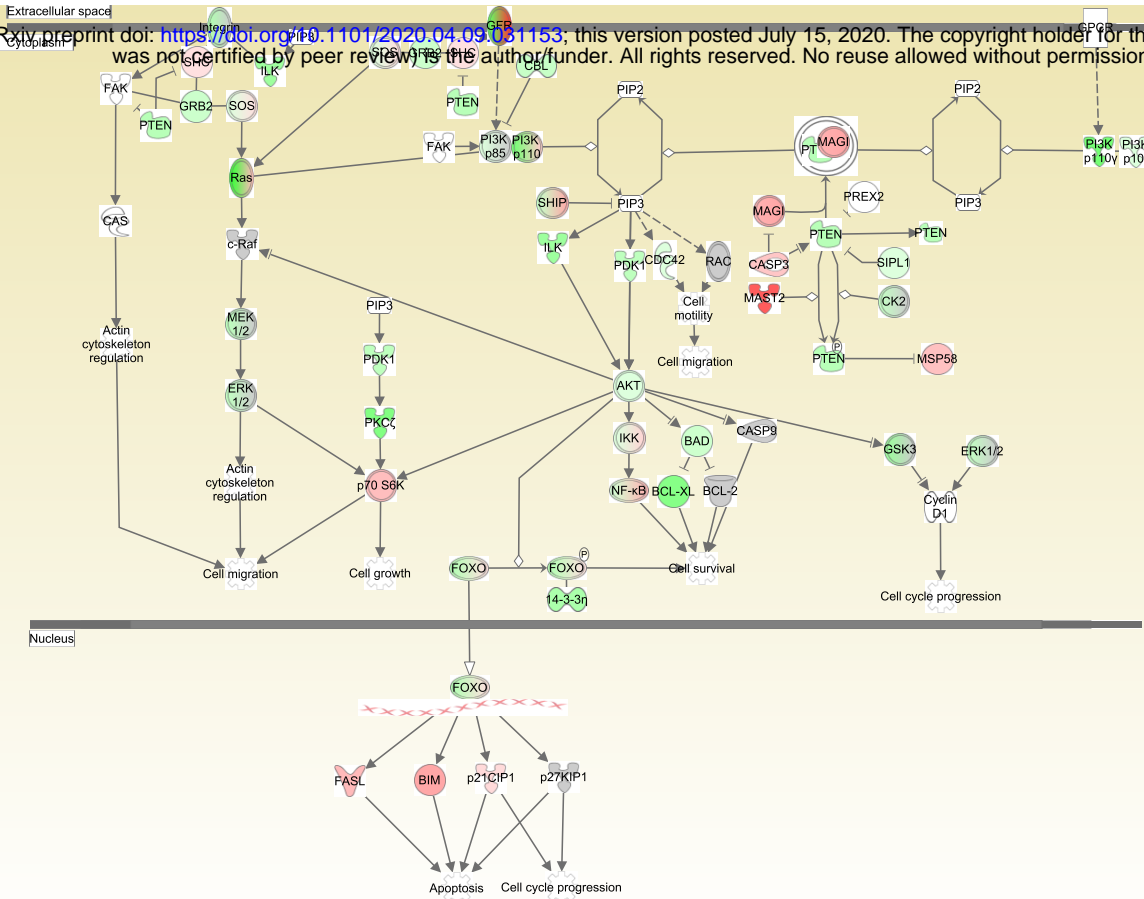

(a)

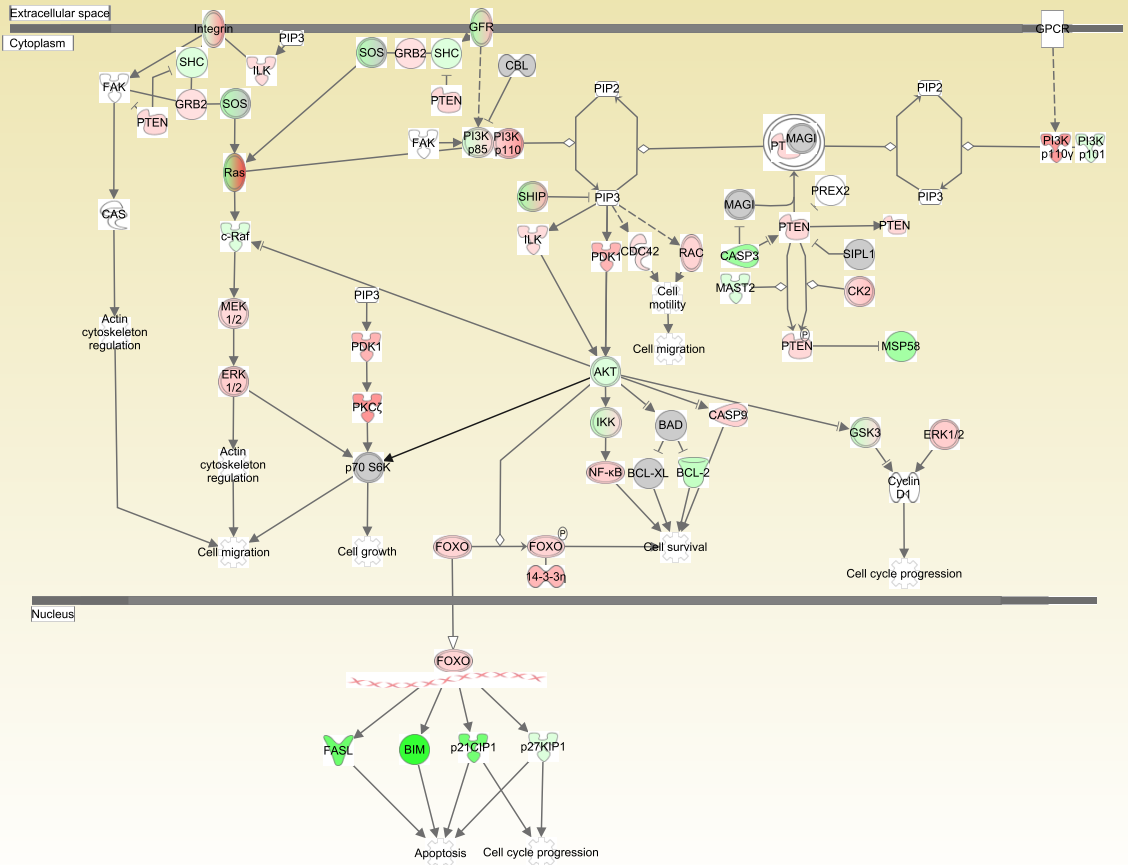

(b)

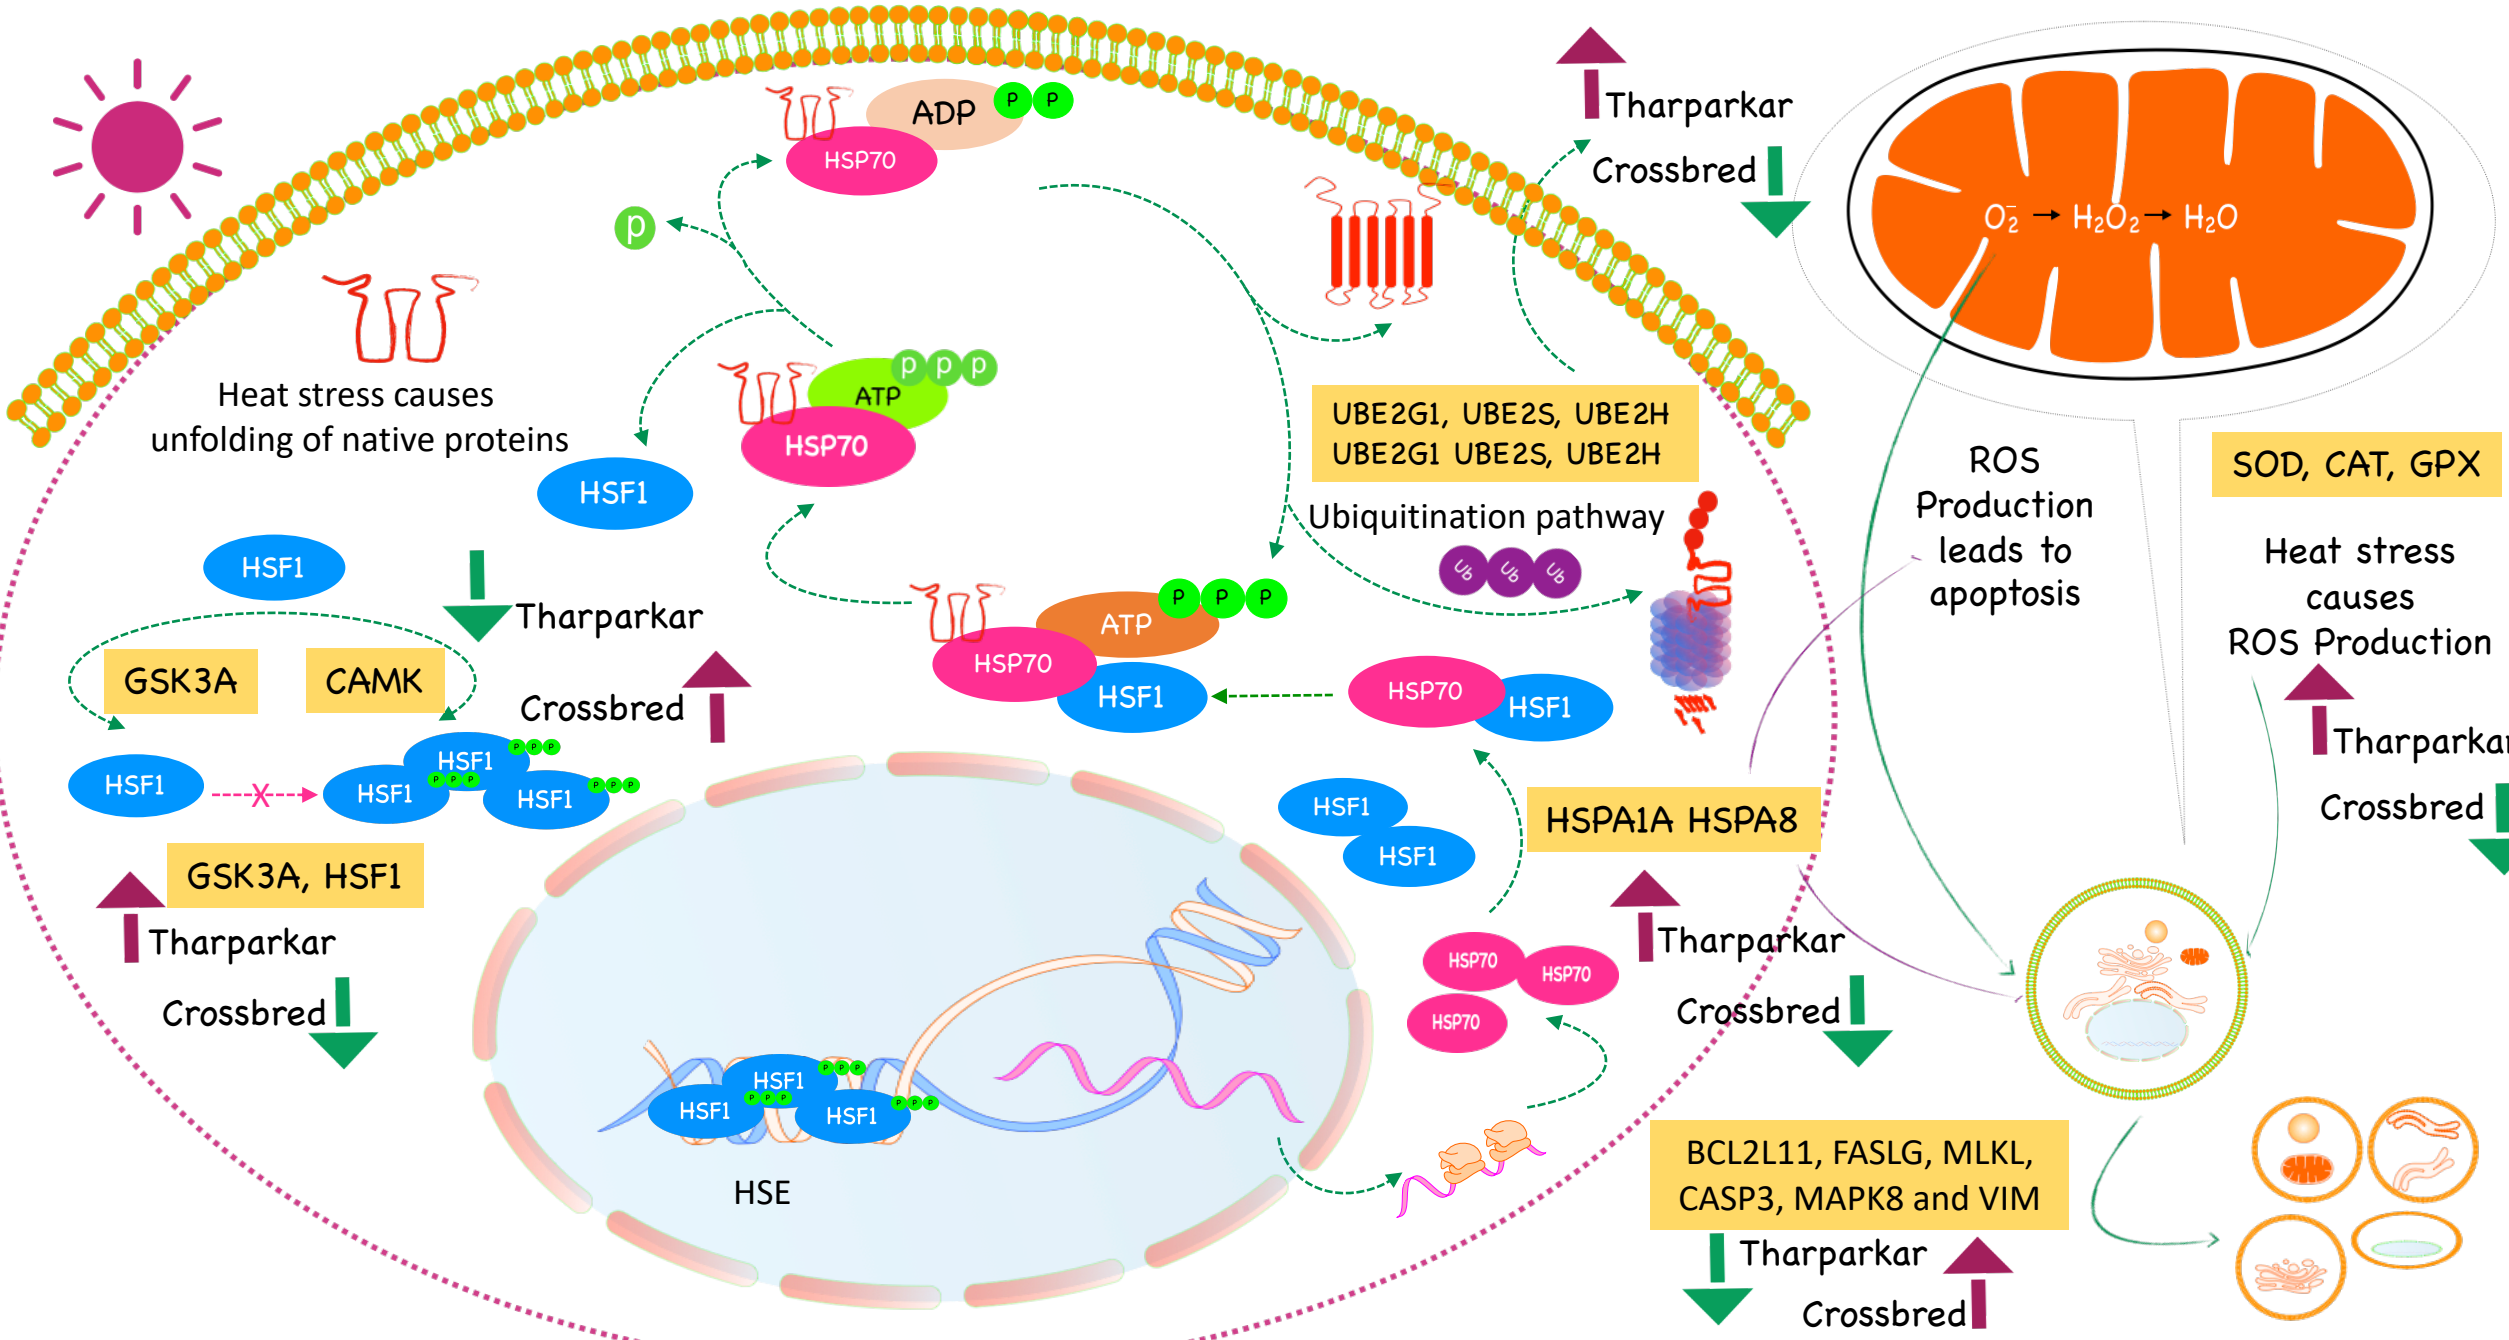

Source: https://www.biorxiv.org/content/biorxiv/early/2020/07/15/2020.04.09.031153.full.pdf
