37 thermodynamic behavior between cattle and its surrounding environment is termed as heat stress  
38 <sup>1</sup>. Environmental induced hyperthermic stress lowers feed intake, which in turn reduces growth,  
39 milk production and reproductive efficiency, thereby negatively affecting the economics of  
40 livestock keepers <sup>2-4</sup>. Heat stress has been associated with reduced fertility through its deleterious  
41 impact on oocyte maturation and early embryonic development <sup>5</sup>. Increased morbidity and  
42 mortality was observed in animals due to immune depressive effect of heat stress <sup>6</sup>.

43 India has a wide variety of indigenous cattle breeds distributed throughout its agro-  
44 climatic zones. These are known for their natural tolerance to tropical heat <sup>7,8</sup>. To meet the  
45 growing demand for milk and to combine the heat tolerance and tick resistance of zebu with the  
46 productivity of temperate dairy breeds <sup>9</sup> several crossbreeding programs were taken up in India.  
47 Every state had its own crossbreeding policy, which is agro-climatic and breed-specific. Though  
48 the zebu crosses with European breeds produced more milk than zebu, they were found not  
49 withstanding heat/solar radiation <sup>10</sup>. Crossbreds are susceptible to tropical diseases and require a  
50 constant input of good management conditions <sup>8</sup>. Antagonism exists between heat tolerance and  
51 milk productivity <sup>11</sup>. The adaptive capacity to heat stress varies between species and genetic  
52 groups within species. Among various adaptive mechanisms, physiological adaptability seems to  
53 be the primary step in cattle. Sahiwal cows better regulate body temperature in response to heat  
54 stress than Karan Fries <sup>8</sup>. It was observed that Ongole cattle rely on the respiration rate to  
55 maintain thermal balance, while, Bali cattle rely on rectal temperature <sup>12</sup>. In Brazil, Sindhi and  
56 Girolando breeds showed better physiological response to thermal stress than Gir cattle <sup>13</sup>.  
57 Increase in respiration rate was reported in Nellore breed when exposed to heat load <sup>14</sup>.

58 In India, Tharparkar is one among the best dairy breeds. It is adapted to the Indian states  
59 of Punjab and Haryana. <sup>15,16</sup>. It is considered to be the hardiest, disease resistant, heat tolerant  
60 and tick resistant indigenous cattle breed of the country <sup>17</sup>. This breed has also been used in  
61 several crossbreeding programs. Currently, percentage of purebreds is exceptionally low in India  
62 (Department of Animal Husbandry & Dairying, Govt. of India). Most of the farmer's in India  
63 have Crossbreds and the percentage of exotic inheritance in these Crossbreds is unknown.  
64 Vrindavani, a Crossbred (synthetic), with 27% of Indigenous blood and 73% of exotic  
65 inheritance <sup>18</sup> is a representation of the kind of admixture that prevails in Indian cattle. Therefore,  
66 comparing Tharparkar with Vrindavani may establish the lost importance of Indigenous cattle

67 and would further emphasize the need of conserving our indigenous purebreds because of  
68 advantageous traits like Heat tolerance.

69 Studies explaining the difference between the genetic groups (Crossbreds and Indigenous  
70 cattle) have been done mainly to address the physiological responses vis – a – vis heat stress and  
71 very few studies at the genomic level have been taken up <sup>19,20</sup>. Also, there is an increasing need to  
72 develop methods by combining the knowledge from -omics technologies to identify heat tolerant  
73 animals <sup>11</sup>. Transcriptome profiling / RNA-Sequencing (RNA-seq) is a high throughput omics  
74 approach to measure relative global changes in the transcripts under specific condition(s) <sup>21-23</sup> to  
75 study the systems biology behind a phenotype <sup>23,24</sup>. RNA - seq allows for analysis of  
76 transcriptome in an unbiased way, with, a tremendous dynamic detection range (>8,000 fold),  
77 and low background signals <sup>25</sup>. It has been used as an investigating tool in understanding disease  
78 pathogenesis <sup>26,27</sup> and differential physiological response to various biotic and abiotic factors  
79 <sup>28,29</sup>.

80 In this study, Tharparkar and Vrindavani cattle were subjected to heat stress and blood  
81 samples were collected on 0<sup>th</sup> day and 7<sup>th</sup> day, as it is known that short term acclimation occurs  
82 around 5 - 6 days <sup>30,31</sup>. The transcriptome of 7<sup>th</sup> day was compared and with 0<sup>th</sup> day in both the  
83 genetic groups to understand their differential response to heat stress.

## 84 **Results**

### 85 **Physiological Parameters**

86 The overview of the analysis is given in Figure 1. Respiration rate (RR), rectal  
87 temperature (RT) and T3 level increased significantly ( $p < 0.05$ ) on 7<sup>th</sup> - day post heat stress in  
88 both the genetic groups ( $n=5$ ) (Figure 2). However, the increase in RR, RT and T3 level, was  
89 found significantly ( $P < 0.05$ ) higher in Vrindavani than in Tharparkar.

### 90 **Comparison of DEGs of Vrindavani and Tharparkar under heat stress**

91 The differentially expressed genes for each genetic group were obtained on comparing  
92 the 0 day and 7<sup>th</sup> day RNA-seq data using EdgeR after obtaining the gene counts from RSEM.  
93 Under heat stress, global expression profiles of Vrindavani and Tharparkar were identified with  
94 6042 and 4718 differentially expressed genes (DEGs), respectively (Supplementary Table 1).  
95 Among these, 3481 DEGs were found common between the two genetic groups, while 2561 and

96 1238 DEGs were uniquely found in Vrindavani and Tharparkar, respectively (Figure 3a).  
97 Additionally, 3132 and 2924 genes were upregulated and downregulated in Vrindavani,  
98 respectively, while 2367 and 2358 genes were upregulated and downregulated in Tharparkar,  
99 respectively (Figure 3b). On comparison of upregulated and downregulated genes, 724 and 1416  
100 genes were found uniquely upregulated and 514 and 1145 genes were found uniquely  
101 downregulated in Tharparkar and Vrindavani, respectively. The comparison also revealed that  
102 17.5% of upregulated genes (1278) in Tharparkar were downregulated in Vrindavani and 18.5%  
103 downregulated genes (1344) in Tharparkar were upregulated in Vrindavani. However, the  
104 number of common upregulated and downregulated genes in both the genetic groups were 357  
105 (4.9%) and 498 (6.8%), respectively (Figure 3c).

## 106 **Functional annotation of DEGs in Reactome**

### 107 *DEGs in Tharparkar and Vrindavani*

108 On functional annotation of all the DEGs (6042 and 4718 in Vrindavani and Tharparkar,  
109 respectively), the commonly enriched significant pathways in both genetic groups included,  
110 neutrophil degranulation, L13a-mediated translational silencing of ceruloplasmin expression,  
111 Formation of a pool of free 40S subunits, ubiquitination and proteasome degradation, SRP-  
112 dependent cotranslational protein targeting to membrane and nonsense-mediated decay and  
113 selenocysteine synthesis. Among the most enriched pathways, peptide chain elongation, gap-  
114 filling DNA repair synthesis and ligation in TC-NER were the pathways significantly enriched in  
115 Tharparkar and not in Vrindavani. The pathways - SCF-beta-TrCP mediated degradation of  
116 Emi1, Autodegradation of Cdh1 by Cdh1:APC/C and Regulation of RAS by GAPs were the  
117 pathways significantly enriched in Vrindavani and not in Tharparkar.

### 118 *Common DEGs in Tharparkar and Vrindavani*

119 On functional annotation of common the DEGs (3481), the enriched significant pathways  
120 included, neutrophil degranulation, L13a-mediated translational silencing of ceruloplasmin  
121 expression, formation of a pool of free 40S subunits, ubiquitination and proteasome degradation,  
122 SRP-dependent cotranslational protein targeting to membrane, RNA Polymerase II Transcription  
123 Termination, Peptide chain elongation, nonsense-mediated decay and selenocysteine synthesis.  
124 On functionally annotation of 1278 common genes that were upregulated in Tharparkar and  
125 downregulated in Vrindavani, the enriched pathways included all the pathways as mentioned for

126 the common except for ubiquitination & proteasome degradation. In addition, cellular response  
127 to stress was found significantly enriched these genes upregulated in Tharparkar and  
128 downregulated in Vrindavani. Further, on assessing the 1344 genes that were upregulated in  
129 Vrindavani and downregulated in Tharparkar, RUNX1 regulates transcription of genes involved  
130 in BCR signaling, p75NTR recruits signaling complexes, chromatin modifying enzymes,  
131 chromatin organization, death receptor signaling, resolution of D-loop structures through  
132 Holliday junction intermediates and TP53 regulates transcription of DNA repair genes pathways  
133 were significantly enriched.

#### 134 *Unique DEGs in Tharparkar*

135 On functional annotation of unique DEGs (1238) expressed only in Tharparkar, the enriched  
136 significant pathways included, nucleotide excision repair, mitotic G1 phase and G1/S transition,  
137 DNA replication pre-initiation, cell cycle, synthesis of DNA, translation, DNA repair, activation  
138 of the pre-replicative complex, cell cycle checkpoints and inhibition of replication initiation of  
139 damaged DNA by RB1/E2F.

#### 140 *Unique DEGs in Vrindavani*

141 On functional annotation of unique DEGs (2561) expressed only in Vrindavani, the enriched  
142 significant pathways included, unfolded protein response (UPR), loss of proteins required for  
143 interphase microtubule organization from the centrosome, amplification of signal from  
144 unattached kinetochores via a MAD2 inhibitory signal, mitotic spindle checkpoint, organelle  
145 biogenesis and maintenance and loss of Nlp from mitotic centrosomes.

### 146 **Functional annotation of DEGs in IPA**

#### 147 *Canonical pathway analysis*

148 Canonical pathway analysis by Ingenuity Pathway Analysis (IPA) revealed contrast in signaling  
149 pathways in Vrindavani and Tharparkar. Canonical pathways associated with Vrindavani and  
150 Tharparkar are represented in Figure 4a and 4b. In Vrindavani, Oncostatin M Signaling,  
151 Phospholipase C Signaling, EIF2 Signaling, Integrin Signaling, IL-3 Signaling, and CXCR4  
152 Signaling were found to be highly inactivated ( $Z$  – score  $> 2.0$ ) and PTEN signaling was found  
153 to be highly activated ( $Z$  – score  $< 2.0$ ). In Tharparkar, EIF2 Signaling, Androgen Signaling,  
154 Oncostatin M Signaling,  $\alpha$ -Adrenergic Signaling, BMP signaling pathway, and UVC-Induced

155 MAPK Signaling were found to be highly activated and PTEN signaling was found to be  
156 inactivated. The canonical pathway Oncostatin M Signaling and EIF2 Signaling were found to  
157 have the highest ratio of genes involved vis-a-vis the genes in the database in Vrindavani and  
158 Tharparkar, respectively.

159 While carrying out comparative analysis through IPA, Calcium-induced T Lymphocyte  
160 Apoptosis, BMP signaling pathway, UVC-Induced MAPK Signaling, Regulation of Cellular  
161 Mechanics by Calpain Protease, fMLP Signaling in Neutrophils, Melatonin Signaling, and  
162 Leukocyte Extravasation Signaling, were found inactivated in Vrindavani and activated in  
163 Tharparkar (Supplementary Figure 1). Genes involved in Oncostatin M Signaling- Growth  
164 factor receptor-bound protein 2 (*GRB2*), GTPase HRas (*HRAS*), Janus kinase 1 (*JAK1*), Janus  
165 kinase 3 (*JAK3*), Mitogen-activated protein kinase kinase 1 (*MAP2K1*), Mitogen-activated  
166 protein kinase 1 (*MAPK1*), Oncostatin-M (*OSM*), Ras-related protein Rap-1b (*RAP1B*), Ras-  
167 related protein Rap-2a (*RAP2A*), Signal transducer and activator of transcription 1-alpha/beta  
168 (*STAT1*), Signal transducer and activator of transcription 5B (*STAT5B*), Non-receptor tyrosine-  
169 protein kinase (*TYK2*), and Ras-related protein (*RRAS*) were found downregulated in Vrindavani  
170 and upregulated in Tharparkar (Figure 5a, b). While the key genes involved in PTEN Signaling  
171 pathway – Fas Ligand (*FASLG*), member of RAS oncogene family (*RAP2A*), Bcl-2-like protein  
172 11 (*BIM*), Caspase-3 (*CASP3*) and microspherule protein 1 (*MSP58*) were found upregulated in  
173 Vrindavani and downregulated in Tharparkar as well (Figure 6a, b).

#### 174 *Variation in microRNAs and Transcription factors*

175 IPA, on evaluating the differentially expression genes predicts miRNAs and  
176 Transcription Factors (upstream regulators). In Vrindavani, 111 miRNAs were found to be  
177 inactivated and 37 activated. In Tharparkar, 205 miRNAs were found to be inactivated and 272  
178 activated. Among them, 52 microRNAs were found common between the two genetic groups.  
179 Most of the common miRNAs were found activated in Vrindavani and inactivated in Tharparkar  
180 (Supplementary Figure 2). miR-4779, miR-4651, miR-1207-5p, miR-6967-5p and miR-504-3p  
181 are the top 5 miRNAs that were activated in Vrindavani and inactivated in Tharparkar.

182 Various Transcription factors were found to regulate the expression of the identified  
183 DEGs. Transcription factors, 19 in Tharparkar (11 activated and 8 inactivated) and 26 in  
184 Vrindavani (8 activated and 18 inactivated) were identified in IPA that regulate the expression of



185 DEGs. Among them, *PAX5*, *MTA3*, *MYC*, *PROX1* and *SMAD7* in Vrindavani and, *HMGAI*,  
186 *MAF*, *MAX* *NOTCH22* and *NCOR1* in Tharparkar are the top 5 upregulated and activated TFs.  
187 On comparing the TFs of Tharparkar and Vrindavani, it was found that *BHLHE40*, *HMGAI*,  
188 *HMGB1*, *IKZF1*, and *TCF7* were found to be common. *BHLHE40*, *HMGAI*, and *TCF7* were  
189 found to be activated in Tharparkar and inactivated in Vrindavani and it was vice - versa with  
190 *HMGB1* and *IKZF1* (Supplementary Figure 3)

#### 191 *Disease and Functions*

192 In the diseases and functions category, on evaluating all the DEGs in both the genetic  
193 groups, survival of the organism, ubiquitination, ubiquitination of protein and repair of DNA  
194 were found activated in Vrindavani and were found either inactivated/ not-activated in  
195 Tharparkar. Similarly, homeostasis, development of hematopoietic cells, leukopoiesis was found  
196 relatively activated in Tharparkar in comparison to Vrindavani. Further, translation, Expression  
197 of protein, translation of protein and degranulation were found inactivated in Vrindavani.

198 On correlating the results of disease and function with the results of reactome four major  
199 processes that were considered to be associated with heat stress viz. elicitation of unfolded  
200 protein response (UPR) in cells; Induction of apoptosis; Ubiquitination and; Imbalance in  
201 production of ROS and antioxidants. Heat shock genes and its associated genes are involved in  
202 elicitation of unfolded protein response (UPR) in cells. Heat shock genes have been found  
203 dysregulated under heat stress in both the genetic groups. Most of the genes encoding Heat  
204 shock proteins (HSPs) - Heat shock 70 kDa protein 4 (*HSPA4*), Heat shock cognate 71 kDa  
205 protein (*HSPB8*), Heat shock 70 kDa protein 1A (*HSPA1A*), Heat shock cognate 71 kDa protein  
206 (*HSPA8*), Heat shock protein HSP 90-beta (*HSP90AB1*) and Heat shock protein HSP 90-alpha  
207 (*HSP90AA1*) and heat shock protein regulating factors- Heat shock factor 1 (*HSF1*) and  
208 Eukaryotic Translation Elongation Factor 1 Alpha 1 (*EEF1A1*) have been found to be  
209 downregulated/not-differentially expressed in Vrindavani but upregulated in Tharparkar.  
210 However, Calcium/Calmodulin Dependent Protein Kinase II Delta (*CAMK2D*) that is involved  
211 in the regulation of expression of heat shock genes was upregulated in Vrindavani and  
212 downregulated in Tharparkar.

213 Among the apoptotic genes, genes encoding Bcl-2-like protein 11 (*BCL2L11*), Tumor  
214 necrosis factor ligand superfamily member 6 (*FASLG*), TIR domain-containing adapter

215 molecule 2 (*TICAM2*), Toll-like receptor 4 (*TLR4*), Adenomatous polyposis coli protein  
216 (*APC*), Caspase-3 (*CASP3*), Mitogen-activated protein kinase 8 (*MAPK8*), Mixed lineage  
217 kinase domain-like protein (*MLKL*), Late endosomal/lysosomal adaptor and MAPK and MTOR  
218 activator 5 (*XIP*), Vimentin (*VIM*), and High mobility group protein B2 (*HMGB2*) were found to  
219 be upregulated in Vrindavani and downregulated in Tharparkar. The number of upregulated  
220 genes involved in achieving the balance of ROS production and antioxidants, were found to be  
221 more in Tharparkar than in Vrindavani. Among these, genes encoding Glutathione peroxidase  
222 3 (*GPX3*), Nudix Hydrolase 2 (*NUDT2*), Catalase (*CAT*), Cytochrome c (*CYCS*), Copper  
223 chaperone for superoxide dismutase (*CCS*), Peroxiredoxin-5 (*PRDX5*), Peroxiredoxin-6  
224 (*PRDX6*), Peroxiredoxin-1 (*PRDX1*), Superoxide dismutase (*SOD1*), and Cytochrome b-245  
225 heavy chain (*CYBB*) were found either downregulated/not-differentially expressed in Vrindavani  
226 and upregulated in Tharparkar. More number of genes involved in Ubiquitination were  
227 differentially expressed in Vrindavani than in the Tharparkar. Genes encoding Ubiquitin-  
228 conjugating enzyme E2 G1 (*UBE2G1*), Ubiquitin-conjugating enzyme E2 (*UBE2S*), Ubiquitin-  
229 conjugating enzyme E2 H (*UBE2H*), Ubiquitin A-52 residue ribosomal protein fusion product 1  
230 (*UBA52*), and Ubiquitin-activating enzyme E1 (*UBA1*) have been found downregulated/not-  
231 differentially expressed in Vrindavani and upregulated in Tharparkar. However, Valosin-  
232 containing protein (*VCP*), RING finger protein 40 (*RNF40*), and Ubiquitin-conjugating enzyme  
233 E2 L3 (*UBE2L3*) have been found downregulated in Vrindavani but not-differentially expressed  
234 in Tharparkar. Among the genes involved in Unfolded Protein folding response (UPR), genes  
235 encoding Membrane-bound transcription factor site-1 protease (*MBTPS1*), Cyclic AMP-  
236 responsive element-binding protein 3-like protein 1 (*CREB3L1*), Stress-associated endoplasmic  
237 reticulum protein 1 (*SERP1*), Glycogen synthase kinase-3 alpha (*GSK3A*), Eukaryotic  
238 translation initiation factor 2 subunit 3 (*EIF2S3*), Calreticulin (*CALR*), and Stress-associated  
239 endoplasmic reticulum protein 1 (*SERP1*) have been found downregulated in Vrindavani and  
240 upregulated in Tharparkar (Figure 7).

#### 241 **Protein - protein interaction (PPI) network**

242 Among the genes involved in the 4 major processes considered, protein - protein interaction  
243 (PPI) network revealed functional importance of HSP70 (HSPA8 and HSPA1A) and ubiquitin  
244 (UBB, UBA52), in coordinating genes involved in heat stress. Out of the total 246 genes



245 identified from the reactome database among these processes, 177 and 194 genes were found to  
246 be differentially expressed in Tharparkar and Vrindavani, respectively. Among these 126 genes  
247 were found to be commonly differentially expressed in Tharparkar and Vrindavani. PPI network  
248 for these common genes between Tharparkar and Vrindavani was constructed (Supplementary  
249 Figure 4). In PPI networks, hubs define the functional and structural importance of a network.  
250 The genes, which act as hubs in PPI networks were found to be *UBB*, *UBA52*, *HSPA8*, and  
251 *HSPA1A* (Supplementary Figure 4). Among the 4 hubs, *UBB* was downregulated in both genetic  
252 groups and the rest were downregulated in Vrindavani and upregulated in Tharparkar.

253 A change in the expression of the hub protein will have a larger effect than change in  
254 expression of non-hub proteins<sup>32</sup>. Therefore, *UBB*, *UBA52*, *HSPA8*, and *HSPA1A* are taken to  
255 be critical for coordinating the changes in systems biology under heat stress. The hubs *HSPA8*  
256 and *HSPA1A* are connected to genes that are associated with regulation of stress viz.  
257 nucleoporins genes - *NUP188*, *NUP155*, *NUP210* & *NUP214*; BAG family molecular chaperone  
258 regulators - *BAG1*, *BAG3* & *BAG4*; Heat Shock Protein Family A - *HSPA5*, *HSPA4*, *HSPA12B*  
259 & *HSPA9*; DnaJ Heat Shock Protein Family i.e. HSP40 - *DNAJ1*, *DNAJ2* & *DNAJB6*; Heat  
260 shock factor - *HSF1*; Ubiquitin - *UBB* & *UBA52* and; Sirtuin - *SIRT1*. The hubs - *UBB* and  
261 *UBA52* are connected to molecules of different proteasome subunits viz.  $\alpha$  type subunits -  
262 *PSMA1* & *PSMA2*;  $\beta$  type subunits - *PSMB4* & *PSMB8*; ATPase subunits - *PSMC2* & *PSMC5*  
263 and non-ATPase subunits - *PSMD2* & *PSMD13*. These hubs were also found connected to  
264 ubiquitin specific peptidases - *USP9X* and *USP7* and Ubiquitin-conjugating enzyme - *UBE2B*,  
265 *UBE2G1*, *UBE2Z*, *UBE2H*, *UBE2J2*, *UBE2S* & *UBE2D2*.

## 266 Real-time validation

267 Six genes (*HSF1*, *SOD1*, *CALR*, *GSK3A*, *CAT* & *GPX3*) that were upregulated in  
268 Tharparkar but downregulated/not expressed in Vrindavani and four genes (*CASP3*, *FASLG*,  
269 *BCL2L1* & *APC*) that were upregulated in Vrindavani but downregulated in Tharparkar were  
270 considered for Real time PCR based on their role in heat stress. The expression of genes was in  
271 concordance with the RNA- Seq results (Supplementary Figure 5 and Supplementary table 2).

## 272 Discussion

273 Heat stress is a natural phenomenon that affects domestic animals in tropical, sub-tropical  
274 and often in temperate regions of the world during summer months. Heat and humidity during

275 the summer months combine to make an uncomfortable environment for dairy cattle. Heat stress  
276 negatively impacts a variety of dairy parameters resulting in economic losses<sup>33</sup>. Response to  
277 heat stress varies with species and genetic groups within species<sup>5,34,35</sup>. In this study,  
278 transcriptome of genetic groups – Vrindavani and Tharparkar cattle under heat stress was  
279 evaluated to understand their differential response to heat stress.

280 Animals (n=5) of both the genetic groups were exposed to a temperature of 42 °C for 7  
281 days. Around 5<sup>th</sup>- 6<sup>th</sup> day, short term heat acclimation occurs<sup>30,31</sup>. This time point was selected  
282 to understand the differences in systems biology to heat stress in the two genetic groups.  
283 Initially, heat stress indicators - RR, RT, and T3 level were evaluated. RR was found to increase  
284 in both genetic groups under heat treatment and the increase in Vrindavani was found to be  
285 significantly (P<0.05) different from that in Tharparkar. A positive correlation exists between  
286 RR and heat treatment<sup>36-38</sup>. This increase is an attempt to dissipate excess body heat by  
287 vaporizing more moisture in expired air or response to a greater requirement of oxygen by  
288 tissues under heat stress. Also, the physiological response to heat stress includes reduced heat  
289 production, which is achieved by lowering feed intake and thyroid hormone secretion<sup>39</sup>. T3 level  
290 increases under heat stress<sup>40,41</sup>. A significant increase in T3 level in Vrindavani as compared to  
291 Tharparkar indicates an effective regulatory mechanism in modulating T3 levels in Tharparkar in  
292 response to heat stress. The T3 triggered metabolism may be one of the reasons that increases  
293 heat production resulting in high rectal temperature in Vrindavani in comparison to Tharparkar  
294 as was found in our study. The significant increase in RR, RT and T3 level in Crossbreed than in  
295 Tharparkar, suggests the inability of Vrindavani to cope up with heat stress in comparison to  
296 Tharparkar.

297 A phenotype is defined by the changes in systems biology. Transcriptome profiling by  
298 RNA-seq is the most common methodology to study the changes in systems biology. RNA  
299 profiling based on next-generation sequencing enables to measure and compare gene expression  
300 patterns<sup>21</sup>. The transcriptome of Tharparkar and Vrindavani indicated differential response to  
301 heat stress as evident from the DEGs, which were either distinct to both or have a difference in  
302 expression. The number of DEGs were higher in Vrindavani than in Tharparkar, suggesting a  
303 greater dysregulation in systems biology in Vrindavani. Among the dysregulated genes, the  
304 number of upregulated genes were more than the downregulated genes in both genetic groups.  
305 However, a contrast in expression was observed with 18.5 % of upregulated genes in Vrindavani,

306 were downregulated in Tharparkar and 17.5% upregulated genes in Tharparkar were  
307 downregulated in Vrindavani.

308 The differentially expressed genes in each genetic group were functionally annotated  
309 using both reactome and IPA. In the reactome, the enriched pathways were identified and in IPA,  
310 based on the expression of the DEGs the activated/inactivated/not-activated pathways were  
311 identified. In reactome, on functionally annotating the DEGs of each of the genetic groups, key  
312 pathways related to stress – neutrophil degranulation <sup>42</sup>, L13a-mediated translational silencing of  
313 ceruloplasmin expression <sup>43</sup>, ubiquitination and proteasome degradation <sup>44</sup>, SRP-dependent  
314 cotranslational protein targeting to membrane <sup>45</sup>, Nonsense-Mediated Decay <sup>46</sup> and  
315 selenocysteine synthesis <sup>47</sup> were enriched in both the genetic groups. Among the common genes,  
316 the genes upregulated in Tharparkar but downregulated in Vrindavani showed enrichment  
317 towards cellular response to stress besides the above-mentioned pathways. This indicated that  
318 Tharparkar must be responding to withstand heat stress. Further, on evaluating the common  
319 genes that were upregulated in Vrindavani and downregulated in Tharparkar, pathways -  
320 chromatin modifying enzymes, chromatin organization and death receptor signaling indicated  
321 towards apoptosis and DNA repair in Vrindavani. These findings were further corroborated with  
322 the pathway enrichment analysis of unique genes in both the genetic groups. IPA analysis of  
323 disease and biological function showed repair of DNA and ubiquitination, activated in  
324 Vrindavani and senescence and degranulation of cells inactivated in Tharparkar. The results from  
325 reactome and IPA suggested Tharparkar may be more resilient than Vrindavani.

326 IPA revealed activation or inactivation of several pathways in both the genetic groups. It  
327 is known that - EIF2 signalling, helps in initiation of global protein translation <sup>48</sup>; MAPK-  
328 signalling pathway, induces cell proliferation <sup>49</sup>; androgen signalling, enhances pro-survival and  
329 anti-apoptotic activity in cell <sup>50</sup>;  $\alpha$ -Adrenergic signalling, maintains immune defence mechanism  
330 <sup>51</sup> and, helps in tissue repair upon stress <sup>52</sup> and increases angiogenesis <sup>53</sup>; integrin pathway, resists  
331 the cell against apoptosis and other environmental insults <sup>54</sup>; IL-3 signalling, aids in cell survival  
332 and haematopoiesis <sup>55</sup>; CXCR4 signalling modulates cell survival and cell motility <sup>56</sup> and ;  
333 Phospholipase C signalling aids in cell survival in stress through protein kinase C dependent  
334 phosphorylation of BCL-2 <sup>57</sup>. Inactivation of these pathways except MAPK-signalling pathway  
335 in Vrindavani and activation of  $\alpha$ -Adrenergic signalling, Androgen signalling, EIF2 signalling

336 and MAPK signalling in Tharparkar indicates that the systems biology in Tharparkar is moving  
337 towards countering the effects due to heat stress.

338 On correlating the reactome data with the IPA four major physiological processes -  
339 elicitation of unfolded protein response (UPR) in cells; Ubiquitination; Induction of apoptosis  
340 and; Imbalance in production of ROS and antioxidants were considered for further evaluation  
341 (Figure 8). Heat shock and its associated genes are involved in elicitation of unfolded protein  
342 response (UPR) in cells. Most of the heat shock genes were found upregulated in Tharparkar and  
343 downregulated in Vrindavani. The increased HSP levels have been found positively correlated  
344 with tolerance in many species<sup>58,59</sup>. HSF1, that positively regulates the transcription of *HSP70*  
345 and *HSP90*<sup>60,61</sup> was found upregulated in Tharparkar and downregulated in Vrindavani.  
346 Upregulation of *HSF1*, *HSP70* and *HSP90* in Tharparkar and vice-versa in Vrindavani  
347 corroborates to state that Tharparkar is better equipped to counter heat stress than Vrindavani.  
348 Further, to ensure that the HSP70 in Tharparkar is maintained at an optimum level, dysregulation  
349 of *CAMK2D* and *GSK3A* seems to act as negative feedback. *CAMK2D* that induces the  
350 transcription of HSP70 via HSF1<sup>62</sup> was found downregulated in Tharparkar. *GSK3A* that  
351 inhibits the trimerization of HSF1 that is needed for the induction of HSP70<sup>63</sup> was found  
352 upregulated in Tharparkar. The decreased level of HSP70 in Vrindavani makes it inevitable that  
353 such negative feedbacks would further reduce its level and hence, *GSK3A* was found  
354 downregulated and *CAMK*, upregulated (Figure 8).

355 Ubiquitination is positively correlated with heat tolerance<sup>64,65</sup>. Ubiquitin-Proteasome  
356 System (UPS) regulates the levels of proteins and acts by removing the misfolded or damaged  
357 proteins that may accumulate as a result of exposure to abiotic stress. Malfunctioning of  
358 ubiquitin-proteasome system (UPS) could have negative consequences for protein regulation,  
359 including loss of function<sup>66</sup>. In Tharparkar after heat acclimation, HSP70 tends to activate the  
360 ubiquitination pathway to minimize the accumulation of the unfolded proteins that can't be  
361 refolded by it<sup>67</sup>. This pathway activation is supported by upregulation of E2 ligases - *UBE2G1*,  
362 *UBE2S*, and *UBE2H* that catalyze covalent attachment of E2 to E3<sup>68-71</sup> in Tharparkar. *USP7*  
363 that deubiquitinates target proteins<sup>72,73</sup> was found upregulated in Vrindavani and downregulated  
364 in Tharparkar. Further, a group of molecules – *VCP*, *SERP1*, and *CALR* that ensure the  
365 protection of naïve proteins during their transport within the cell<sup>74-76</sup> were found upregulated in

366 Tharparkar and downregulated in Vrindavani. Unlike Vrindavani, Tharparkar is not only  
367 endowed with higher expression of the scavengers of misfolded proteins but also with protectors  
368 of naïve unfolded proteins.

369         Activation of apoptosis pathway is one of the major physiological processes linked with  
370 heat stress. Among the apoptotic genes, *BCL2L11*, *FASLG*, *MLKL*, *CASP3*, *MAPK8*, and *VIM*  
371 have been found upregulated in Vrindavani and downregulated in Tharparkar under heat stress.  
372 *BCL2L11* induces apoptosis by neutralizing key molecules of pro-survival BCL2 sub-family  
373 <sup>77,78</sup>, *FASLG* transduces the apoptotic signal into cells<sup>79,80</sup>, *CASP3* activates caspases and  
374 executes apoptosis <sup>81</sup>, and *MAPK8*, *MLKL*, and *VIM* also induce apoptosis <sup>82,83</sup>. *PTEN*  
375 signaling pathway that drives apoptosis <sup>84,85</sup> was found inactivated in Tharparkar and activated in  
376 Vrindavani. This indicates a relatively higher probability of apoptosis in Vrindavani than in  
377 Tharparkar.

378         The ability to balance the ROS and antioxidant level, is one of the key factors that would  
379 determine the tolerance of an individual to heat stress. The antioxidant triad of *GPX*, *SOD*, and  
380 *CAT* that forms the first line of defense against reactive oxygen species <sup>86-88</sup>, was found  
381 upregulated in Tharparkar and downregulated in Vrindavani. Additionally, genes belonging to  
382 Peroxiredoxins - *PRDX3*, *PRDX5* and *PRDX6* that catalyze the reduction of hydrogen peroxide  
383 and organic hydroperoxides <sup>89-93</sup>, were also found upregulated in Tharparkar and were either  
384 downregulated or not-differentially expressed in Vrindavani. Higher expression of the  
385 antioxidants in Tharparkar enables it to cope up with higher levels of free radicals generated as a  
386 result of heat stress while Vrindavani is unable to do so.

## 387 **Conclusion**

388         A contrast in expression was observed with 18.5 % of upregulated genes in Vrindavani  
389 were downregulated in Tharparkar and 17.5% upregulated genes in Tharparkar were  
390 downregulated in Vrindavani. Transcripts of molecules that stimulate heat shock response,  
391 Ubiquitination, unfolded protein response and antioxidant level were found upregulated in  
392 Tharparkar and downregulated in Vrindavani. *EIF2* Signaling that promotes protein translation  
393 and *PTEN* signaling that drives apoptosis were found activated and inactivated in Tharparkar,  
394 respectively and vice-versa in Vrindavani. We found relevant molecules/genes dysregulated in  
395 Tharparkar in the direction that counters heat stress. A proposed contrasting interplay of

396 molecules in both the two groups is shown in Figure 8. To the best of our knowledge this is a  
397 comprehensive comparison between Tharparkar and Vrindavani at a global level using  
398 transcriptome analysis.

## 399 **Methods**

### 400 **Experimental condition and Ethical Statement**

401 The animals used for the study were from the Indian Veterinary Research Institute. The  
402 permission to conduct the study was granted by Indian Veterinary Research Institutional Animal  
403 Ethics Committee (IVRI-IAEC) under the Committee for Control and Supervision of  
404 Experiments on Animals (CPCSEA), India, vide letter no 387/CPSCEA. Genetic groups -  
405 Tharparkar (Indigenous breeds) and Vrindavani (synthetic Crossbred) were considered in this  
406 study. Prior to experiment, the animals – 05 Tharparkar and 05 Vrindavani cattle, were  
407 acclimatized for 15 days outside the Psychometric chamber. The experiment was conducted  
408 during October when the environmental Temperature Humidity Index (THI) was 73.0242. These  
409 animals were exposed in Psychometric chamber at 42 °C for six hours for 7 days (THI  
410 =78.5489). All the animals were fed with wheat straw and concentrate mixture in 60:40 ratios.  
411 Respiration rate (RR) and rectal temperature (RT) of animals from each genetic group were  
412 measured on 0 day (Control, n=5) before exposure to Psychometric chamber and on 7<sup>th</sup> day of  
413 heat exposure (Treated, n=5). Blood samples were collected from the animals at the mentioned  
414 time points and serum concentration of Triiodothyronine (T3) was estimated by RIA technique  
415 using T<sub>3</sub> <sup>125</sup>I (Immunotech) as per the manufacturer's instructions.

### 416 **RNA sequencing (RNA-seq)**

417 PBMCs were collected from the blood samples using Ficoll histopaque gradient method.  
418 Total RNA from each of the collected samples (PBMCs) was isolated using the RNeasy Mini kit  
419 (Qiagen GmbH, Germany) according to the manufacturer's protocol. The integrity and quantity  
420 of isolated RNA were assessed on a Bioanalyzer 2100 (Agilent Technologies, Inc). The library  
421 was prepared using NEBNext Ultra RNA Library Prep Kit for Illumina (NewEngland Biolabs  
422 Inc.) following the manufacturer's protocol. Approximately, 100ng of RNA from each sample  
423 was used for RNA library preparation. The quality of the libraries was assessed on Bioanalyzer.  
424 Libraries were quantified using a Qubit 2.0 Fluorometer (Life technologies) and by qPCR.  
425 Library (1.3ml, 1.8pM) was denatured, diluted and loaded onto a flow cell for sequencing.



426 cDNA library preparation and Illumina Sequencing was performed at Sandor Life Sciences Pvt.  
427 (Hyderabad, India). Finally, the RNA-seq data were provided in FASTQ format.

#### 428 **Data processing**

429 The sequenced reads were paired-end and 150bp in length. Quality control checks on raw  
430 sequence data from each sample were performed using FastQC (Babraham Bioinformatics).  
431 Processing of the data was performed using prinseq-lite software <sup>94</sup> to remove reads of low  
432 quality (mean phred score 25) and short length (< 50) for downstream analysis. The data was  
433 submitted to the GEO database with accession number GSE136652.

#### 434 **Identification of Differentially Expressed Genes (DEGs)**

435 *Bos taurus* reference genome (release 94) and its associated gene transfer file (GTF) were  
436 downloaded from Ensembl FTP genome browser <sup>95</sup>. The reference genome was prepared and  
437 indexed by RNA-Seq by expectation maximization (RSEM) <sup>96</sup> by rsem-prepare-reference  
438 command. Further, the clean reads obtained from filtering of raw data were aligned to the  
439 indexed reference genome by Bowtie2 <sup>97</sup> to estimate gene abundance in counts by rsem-  
440 calculate-expression command. To compare the gene expression levels among different samples,  
441 the aligned reads were used to generate a data matrix by rsem-generate-data-matrix command.  
442 In each genetic group, all the samples of day 7 (treated) were compared with the day 0 (Control)  
443 for the calculation of differential gene expression by edgeR <sup>98</sup> package. The Ensemble IDs of the  
444 differentially expressed genes (DEGs) were converted to the respective gene ID by g: Convert of  
445 g: Profiler <sup>99,100</sup>.

#### 446 **Functional Analysis of DEGs - Reactome and Ingenuity pathway analysis (IPA)**

447 The differentially expressed genes in both the genetic groups were functionally annotated  
448 in Reactome <sup>101</sup> and IPA (Ingenuity Pathway Analysis). Reactome provides bioinformatics tools  
449 for visualisation, interpretation and analysis of pathway knowledge to support basic research.  
450 Reactome analysis was done for all DEGs in both genetic groups, common DEGs and for unique  
451 DEGs for each genetic group. For common DEGs, analysis was also done for contrasting genes  
452 (genes upregulated in Tharparkar but downregulated in Vrindavani and the vice-versa).

453 QIAGEN's IPA (QIAGEN, Redwood City, USA) <sup>102</sup> is used to quickly visualize and  
454 understand complex omics data and perform insightful data analysis and interpretation by

455 placing experimental results within the context of biological systems. Here, IPA was used to  
456 analyze the identified DEGs of Vrindavani and Tharparkar. The list of DEGs from each genetic  
457 group was used to identify the canonical pathways and the most significant biological processes  
458 against Ingenuity Pathways Knowledge Base (IKB). Core analysis for each dataset was  
459 performed to know activated ( $Z$  score  $> 2$ ) or inactivated ( $Z$  score  $< -2$ ) canonical pathways.  
460 Upstream regulators - Transcription factors and microRNAs were identified. Significant  
461 Diseases and functions were also identified.

462 The results obtained from Reactome and IPA were correlated to narrow down to  
463 processes - Induction of apoptosis, Ubiquitination, elicitation of unfolded protein response  
464 (UPR) in cells and Imbalance in production of ROS and antioxidants. The unique genes involved  
465 in all related pathways to the processes mentioned above were extracted from the Reactome  
466 analysis and were found to be 246 in number. From among these genes the number of  
467 differentially expressed genes in Tharparkar and Vrindavani, and the common genes between the  
468 genetic groups were extracted.

#### 469 **Predicted protein-protein interaction network**

470 Protein interaction network (interactome) analysis provides an effective way to  
471 understand the interrelationships between genes<sup>103</sup>. Protein-protein interactions (PPI) among the  
472 common genes involved in the processes mentioned, were retrieved using String database<sup>104</sup>.  
473 The degree was calculated using igraph package ([https://cran.r-project.org/web/packages/igraph/](https://cran.r-project.org/web/packages/igraph/index.html)  
474 [index.html](https://cran.r-project.org/web/packages/igraph/index.html)). The PPI network was then visualized using Cytoscape software V. 3.7<sup>105</sup> using  
475 DEGs and degree value from igraph.

#### 476 **Validation of reference genes identified**

477 The quantity of data generated from RNA sequencing is large and therefore it is  
478 important to validate differential expression by real-time RT-PCR. Genes - *BCL2L11*, *FASLG*,  
479 *CASP3*, *CAT*, *SOD1*, *GSK3A*, *CALR*, *HSF1*, *APC*, and *GPX3* were selected based on their role in  
480 heat stress and qRT-PCR was performed on Applied Biosystems 7500 Fast system. *GAPDH* was  
481 taken as the internal control. Each of the samples was run in triplicates and relative expression of  
482 each gene was calculated using the  $2^{-\Delta\Delta CT}$  method with control as the calibrator<sup>106</sup>.

#### 483 **Statistical Analysis**

484           Respiration rate, Rectal temperature and T3 level were compared using student's *t*-test in  
485 JMP9 (SAS Institute Inc., Cary, USA) to test the significance of the difference between the  
486 control (0 day) and treated (7<sup>th</sup> day). This comparison was done within and between genetic  
487 groups. Differences within/between groups were considered significant at  $P \leq 0.05$ .

## 488 **Declarations**

### 489 **Ethics approval and consent to participate**

490 The permission to conduct the study was granted by Indian Veterinary Research Institutional  
491 Animal Ethics Committee (IVRI-IAEC) under the Committee for Control and Supervision of  
492 Experiments on Animals (CPCSEA), India, vide letter no 387/CPSCEA.

### 493 **Consent for publication**

494 Not applicable.

### 495 **Availability of data and materials**

496 The data was submitted to the GEO database with accession number GSE136652

### 497 **Competing interests**

498 None of the authors had a conflict of interest to declare

### 499 **Funding**

500 This study was supported by “National Innovations in Climate Resilient Agriculture (NICRA) -  
501 Identification of unique factors in indigenous livestock making them resilient to climate change  
502 in relation to diseases” for the funds to carryout Sampling, Wet Lab experiments and for the  
503 procurement of License of IPA.

### 504 **Authors' contributions**

505 AKT and RG conceived and designed the research. SG, SmS, AS,AV, VV , PK , ShS and GS  
506 conducted the wet lab work. RINK, ARS, NH, WAM, MRP, SK , AP and RG analyzed the data.

507 RINK, ARS, MRP, RG , AS and GS helped in manuscript drafting and editing. AKT and RG  
508 proofread the manuscript

## 509 Acknowledgements

510 We also thank Department of Biotechnology, Govt of India for providing fellowship and  
511 contingency for RK (DBT Fellow No. DBT/2017/IVRI/768), ARS (DBT Fellow No.  
512 DBT/2014/IVRI/170) and WAM (DBT Fellow No. DBT/2017/IVRI/769).

## 513 References

- 514 1 Mehla, K. *et al.* Genome-wide analysis of the heat stress response in Zebu (Sahiwal) cattle. *Gene*  
515 **533**, 500-507 (2014).
- 516 2 Armstrong, D. V. Heat stress interaction with shade and cooling. *J. Dairy Sci.* **77**, 2044-2050,  
517 doi:10.3168/jds.S0022-0302(94)77149-6 (1994).
- 518 3 Rojas-Downing, M. M., Nejadhashemi, A. P., Harrigan, T. & Woznicki, S. A. Climate change and  
519 livestock: Impacts, adaptation, and mitigation. *Climate Risk Management* **16**, 145-163 (2017).
- 520 4 Hahn, G. Dynamic responses of cattle to thermal heat loads. *J. Anim. Sci.* **77**, 10-20 (1999).
- 521 5 Dash, S. *et al.* Effect of heat stress on reproductive performances of dairy cattle and buffaloes: A  
522 review. *Veterinary world* **9**, 235 (2016).
- 523 6 Renaudeau, D. *et al.* Adaptation to hot climate and strategies to alleviate heat stress in livestock  
524 production. *Animal* **6**, 707-728 (2012).
- 525 7 Berman, A. Invited review: Are adaptations present to support dairy cattle productivity in warm  
526 climates? *J. Dairy Sci.* **94**, 2147-2158 (2011).
- 527 8 Rashamol, V. P. *et al.* Physiological adaptability of livestock to heat stress: an updated review. *J*  
528 *Anim Behav Biometeorol* **6**, 62-71 (2018).
- 529 9 Davis, S. R., Spelman, R. J. & Littlejohn, M. D. BREEDING AND GENETICS SYMPOSIUM:Breeding  
530 heat tolerant dairy cattle: the case for introgression of the "slick" prolactin receptor variant into  
531 dairy breeds. *J Anim Sci* **95**, 1788-1800, doi:10.2527/jas.2016.0956 (2017).
- 532 10 Mcmanus, C. M., Louvandini, H., Paim, T. P., Silva, F. C. P. e. & Bernal, F. E. M. Factors affecting  
533 heat tolerance in crossbred cattle in central Brazil. *Ciência Animal Brasileira* **15**, 152-158 (2014).
- 534 11 Carabano, M. J., Ramon, M., Menendez-Buxadera, A., Molina, A. & Diaz, C. Selecting for heat  
535 tolerance. *Anim Front* **9**, 62-68, doi:10.1093/af/vfy033 (2019).
- 536 12 Aritonang, S., Yuniati, R., Abinawanto, Imron, M. & Bowolaksono, A. in *AIP Conference*  
537 *Proceedings*. 030098 (AIP Publishing).
- 538 13 Cardoso, C. *et al.* Physiological and thermographic response to heat stress in zebu cattle.  
539 *Livestock Science* **182**, 83-92 (2015).
- 540 14 Valente, É. E. L. *et al.* Intake, physiological parameters and behavior of Angus and Nellore bulls  
541 subjected to heat stress. *Semina: Ciências Agrárias* **36**, 4565-4574 (2015).
- 542 15 Sodhi, M., Mukesh, M., Prakash, B., Ahlawat, S. & Sobti, R. Microsatellite DNA typing for  
543 assessment of genetic variability in Tharparkar breed of Indian zebu (*Bos indicus*) cattle, a major  
544 breed of Rajasthan. *Journal of genetics* **85**, 165-170 (2006).
- 545 16 Rachagani, S., Gupta, I. D., Gupta, N. & Gupta, S. Genotyping of  $\beta$ -Lactoglobulin gene by PCR-  
546 RFLP in Sahiwal and Tharparkar cattle breeds. *BMC Genet.* **7**, 31 (2006).

- 547 17 Choudhary, S. *et al.* Tharparkar: The pride of desert. *Journal of entomology and zoology studies*  
548 **6**, 1915-1919 (2018).
- 549 18 Ahmad, S. F. *et al.* Revelation of genomic breed composition in a crossbred cattle of India with  
550 the help of Bovine50K BeadChip. *Genomics* **112**, 1531-1535, doi:10.1016/j.ygeno.2019.08.025  
551 (2020).
- 552 19 Salleh, M. *et al.* RNA-Seq transcriptomics and pathway analyses reveal potential regulatory  
553 genes and molecular mechanisms in high-and low-residual feed intake in Nordic dairy cattle.  
554 *BMC Genomics* **18**, 258 (2017).
- 555 20 Cánovas, A., Rincon, G., Islas-Trejo, A., Wickramasinghe, S. & Medrano, J. F. SNP discovery in the  
556 bovine milk transcriptome using RNA-Seq technology. *Mamm. Genome* **21**, 592-598 (2010).
- 557 21 Mortazavi, A., Williams, B. A., McCue, K., Schaeffer, L. & Wold, B. Mapping and quantifying  
558 mammalian transcriptomes by RNA-Seq. *Nat. Methods* **5**, 621 (2008).
- 559 22 Wang, Z., Gerstein, M. & Snyder, M. RNA-Seq: a revolutionary tool for transcriptomics. *Nature*  
560 *reviews genetics* **10**, 57 (2009).
- 561 23 Wani, S. A. *et al.* Contrasting gene expression profiles of monocytes and lymphocytes from  
562 Peste-des-petits-ruminants virus infected goats. *Front. Immunol.* **10** (2019).
- 563 24 Manjunath, S. *et al.* Comparative and temporal transcriptome analysis of peste des petits  
564 ruminants virus infected goat peripheral blood mononuclear cells. *Virus Res.* **229**, 28-40 (2017).
- 565 25 Li, P., Piao, Y., Shon, H. S. & Ryu, K. H. Comparing the normalization methods for the differential  
566 analysis of Illumina high-throughput RNA-Seq data. *BMC Bioinformatics* **16**, 347 (2015).
- 567 26 Khanduri, A. *et al.* Dysregulated miRNAome and proteome of PPRV infected goat PBMCs reveal a  
568 coordinated immune response. *Front. Immunol.* **9**, 2631 (2018).
- 569 27 Pandey, A. *et al.* Modulation of host miRNAs transcriptome in lung and spleen of Peste des  
570 Petits ruminants virus infected sheep and goats. *Front. Microbiol.* **8**, 1146 (2017).
- 571 28 O'Loughlin, A. *et al.* Transcriptomic analysis of the stress response to weaning at housing in  
572 bovine leukocytes using RNA-seq technology. *BMC Genomics* **13**, 250 (2012).
- 573 29 Salama, A. *et al.* Different levels of response to heat stress in dairy goats. *Small Rumin. Res.* **121**,  
574 73-79 (2014).
- 575 30 Dangi, S. S. *et al.* Modulatory effect of betaine on expression dynamics of HSPs during heat  
576 stress acclimation in goat (*Capra hircus*). *Gene* **575**, 543-550 (2016).
- 577 31 Garrett, A. *et al.* Short-term heat acclimation is effective and may be enhanced rather than  
578 impaired by dehydration. *Am. J. Hum. Biol.* **26**, 311-320 (2014).
- 579 32 He, X. & Zhang, J. Why do hubs tend to be essential in protein networks? *PLoS Genet* **2**, e88,  
580 doi:10.1371/journal.pgen.0020088 (2006).
- 581 33 Polsky, L. & von Keyserlingk, M. A. Invited review: Effects of heat stress on dairy cattle welfare. *J.*  
582 *Dairy Sci.* **100**, 8645-8657 (2017).
- 583 34 Ross, J. *et al.* Physiological consequences of heat stress in pigs. *Animal Production Science* **55**,  
584 1381-1390 (2015).
- 585 35 Mayorga, E. J., Renaudeau, D., Ramirez, B. C., Ross, J. W. & Baumgard, L. H. Heat stress  
586 adaptations in pigs. *Animal Frontiers* **9**, 54-61 (2018).
- 587 36 Blackshaw, J. K. & Blackshaw, A. Heat stress in cattle and the effect of shade on production and  
588 behaviour: a review. *Australian Journal of Experimental Agriculture* **34**, 285-295 (1994).
- 589 37 Beede, D. & Collier, R. Potential nutritional strategies for intensively managed cattle during  
590 thermal stress. *J. Anim. Sci.* **62**, 543-554 (1986).
- 591 38 Ganaie, A. *et al.* Biochemical and physiological changes during thermal stress in bovines: A  
592 review. *Iranian Journal of Applied Animal Science* **3**, 423-430 (2013).
- 593 39 Hansen, P. Physiological and cellular adaptations of zebu cattle to thermal stress. *Anim. Reprod.*  
594 *Sci.* **82**, 349-360 (2004).

- 595 40 Magdub, A., Johnson, H. & Belyea, R. Effect of environmental heat and dietary fiber on thyroid  
596 physiology of lactating cows. *J. Dairy Sci.* **65**, 2323-2331 (1982).
- 597 41 Williamson, R., Misson, B. & Davison, T. The effect of exposure to 40 on the heat production and  
598 the serum concentrations of triiodothyronine, thyroxine, and corticosterone in immature  
599 domestic fowl. *Gen. Comp. Endocrinol.* **60**, 178-186 (1985).
- 600 42 Rodeberg, D. A., Meyer, J. G. & Babcock, G. F. Heat shock response: presence and effects in burn  
601 patient neutrophils. *Journal of leukocyte biology* **66**, 773-780, doi:10.1002/jlb.66.5.773 (1999).
- 602 43 Orzheshkovskiy, V. V. & Trishchynska, M. A. Ceruloplasmin: Its Role in the Physiological and  
603 Pathological Processes. *Neurophysiology* **51**, 141-149, doi:10.1007/s11062-019-09805-9 (2019).
- 604 44 Flick, K. & Kaiser, P. Protein degradation and the stress response. *Seminars in cell &  
605 developmental biology* **23**, 515-522, doi:10.1016/j.semcd.2012.01.019 (2012).
- 606 45 Zhang, D., Sweredoski, M. J., Graham, R. L., Hess, S. & Shan, S. O. Novel proteomic tools reveal  
607 essential roles of SRP and importance of proper membrane protein biogenesis. *Molecular &  
608 cellular proteomics : MCP* **11**, M111 011585, doi:10.1074/mcp.M111.011585 (2012).
- 609 46 Goetz, A. E. & Wilkinson, M. Stress and the nonsense-mediated RNA decay pathway. *Cellular  
610 and molecular life sciences : CMLS* **74**, 3509-3531, doi:10.1007/s00018-017-2537-6 (2017).
- 611 47 Hariharan, S. & Dharmaraj, S. Selenium and selenoproteins: it's role in regulation of  
612 inflammation. *Inflammopharmacology* **28**, 667-695, doi:10.1007/s10787-020-00690-x (2020).
- 613 48 Rajesh, K. *et al.* Phosphorylation of the translation initiation factor eIF2alpha at serine 51  
614 determines the cell fate decisions of Akt in response to oxidative stress. *Cell Death Dis* **6**, e1591,  
615 doi:10.1038/cddis.2014.554 (2015).
- 616 49 Zhang, W. & Liu, H. T. MAPK signal pathways in the regulation of cell proliferation in mammalian  
617 cells. *Cell Res* **12**, 9-18, doi:10.1038/sj.cr.7290105 (2002).
- 618 50 Shiota, M., Yokomizo, A. & Naito, S. Pro-survival and anti-apoptotic properties of androgen  
619 receptor signaling by oxidative stress promote treatment resistance in prostate cancer. *Endocr  
620 Relat Cancer* **19**, R243-253, doi:10.1530/ERC-12-0232 (2012).
- 621 51 Lacoste, A., De Cian, M. C., Cuffe, A. & Poulet, S. A. Noradrenaline and alpha-adrenergic signaling  
622 induce the hsp70 gene promoter in mollusc immune cells. *J Cell Sci* **114**, 3557-3564 (2001).
- 623 52 Xian, D. *et al.* Emerging Roles of Redox-Mediated Angiogenesis and Oxidative Stress in  
624 Dermatoses. *Oxid Med Cell Longev* **2019**, 2304018, doi:10.1155/2019/2304018 (2019).
- 625 53 Zhao, X. *et al.* Overexpression of Cardiomyocyte alpha1A-Adrenergic Receptors Attenuates  
626 Postinfarct Remodeling by Inducing Angiogenesis Through Heterocellular Signaling. *Arterioscler  
627 Thromb Vasc Biol* **35**, 2451-2459, doi:10.1161/ATVBAHA.115.305919 (2015).
- 628 54 Stupack, D. G. & Chersesh, D. A. Get a ligand, get a life: integrins, signaling and cell survival. *J Cell  
629 Sci* **115**, 3729-3738, doi:10.1242/jcs.00071 (2002).
- 630 55 Reddy, E. P., Korapati, A., Chaturvedi, P. & Rane, S. IL-3 signaling and the role of Src kinases, JAKs  
631 and STATs: a covert liaison unveiled. *Oncogene* **19**, 2532-2547, doi:10.1038/sj.onc.1203594  
632 (2000).
- 633 56 Young, B., Purcell, C., Kuang, Y. Q., Charette, N. & Dupre, D. J. Superoxide Dismutase 1  
634 Regulation of CXCR4-Mediated Signaling in Prostate Cancer Cells is Dependent on Cellular  
635 Oxidative State. *Cell Physiol Biochem* **37**, 2071-2084, doi:10.1159/000438566 (2015).
- 636 57 Bai, X. C. *et al.* Phospholipase C-gamma1 is required for survival in heat stress: involvement of  
637 protein kinase C-dependent Bcl-2 phosphorylation. *J Biochem* **131**, 207-212,  
638 doi:10.1093/oxfordjournals.jbchem.a003089 (2002).
- 639 58 Parsell, D. & Lindquist, S. The function of heat-shock proteins in stress tolerance: degradation  
640 and reactivation of damaged proteins. *Annu. Rev. Genet.* **27**, 437-496 (1993).



- 641 59 Rout, P., Kaushik, R. & Ramachandran, N. Differential expression pattern of heat shock protein  
642 70 gene in tissues and heat stress phenotypes in goats during peak heat stress period. *Cell Stress*  
643 *Chaperones* **21**, 645-651 (2016).
- 644 60 Westerheide, S. D., Ankar, J., Stevens, S. M., Sistonen, L. & Morimoto, R. I. Stress-inducible  
645 regulation of heat shock factor 1 by the deacetylase SIRT1. *Science* **323**, 1063-1066 (2009).
- 646 61 Prodromou, C. Mechanisms of Hsp90 regulation. *Biochem. J.* **473**, 2439-2452 (2016).
- 647 62 Holmberg, C. I. *et al.* Phosphorylation of serine 230 promotes inducible transcriptional activity of  
648 heat shock factor 1. *The EMBO journal* **20**, 3800-3810 (2001).
- 649 63 Wang, X., Grammatikakis, N., Siganou, A. & Calderwood, S. K. Regulation of molecular  
650 chaperone gene transcription involves the serine phosphorylation, 14-3-3 $\epsilon$  binding, and  
651 cytoplasmic sequestration of heat shock factor 1. *Mol. Cell. Biol.* **23**, 6013-6026 (2003).
- 652 64 Ryu, K. Y. *et al.* The mouse polyubiquitin gene UbC is essential for fetal liver development,  
653 cell-cycle progression and stress tolerance. *The EMBO journal* **26**, 2693-2706 (2007).
- 654 65 Lyzenga, W. J. & Stone, S. L. Abiotic stress tolerance mediated by protein ubiquitination. *J. Exp.*  
655 *Bot.* **63**, 599-616 (2011).
- 656 66 Sulistio, Y. A. & Heese, K. The ubiquitin-proteasome system and molecular chaperone  
657 deregulation in Alzheimer's disease. *Mol. Neurobiol.* **53**, 905-931 (2016).
- 658 67 Fernández-Fernández, M. R., Gragera, M., Ochoa-Ibarrola, L., Quintana-Gallardo, L. & Valpuesta,  
659 J. M. Hsp70—a master regulator in protein degradation. *FEBS Lett.* **591**, 2648-2660 (2017).
- 660 68 Pabarcus, M. K. *et al.* CYP3A4 ubiquitination by gp78 (the tumor autocrine motility factor  
661 receptor, AMFR) and CHIP E3 ligases. *Arch. Biochem. Biophys.* **483**, 66-74 (2009).
- 662 69 David, Y., Ziv, T., Admon, A. & Navon, A. The E2 ubiquitin-conjugating enzymes direct  
663 polyubiquitination to preferred lysines. *J. Biol. Chem.* **285**, 8595-8604 (2010).
- 664 70 Sheng, Y. *et al.* A human ubiquitin conjugating enzyme (E2)-HECT E3 ligase structure-function  
665 screen. *Mol. Cell. Proteomics* **11**, 329-341 (2012).
- 666 71 Kaiser, P. *et al.* A human ubiquitin-conjugating enzyme homologous to yeast UBC8. *J. Biol. Chem.*  
667 **269**, 8797-8802 (1994).
- 668 72 Li, M. *et al.* Deubiquitination of p53 by HAUSP is an important pathway for p53 stabilization.  
669 *Nature* **416**, 648 (2002).
- 670 73 Zhao, Y. *et al.* Noncanonical regulation of alkylation damage resistance by the OTUD4  
671 deubiquitinase. *The EMBO journal* **34**, 1687-1703 (2015).
- 672 74 Kadowaki, H. *et al.* Pre-emptive quality control protects the ER from protein overload via the  
673 proximity of ERAD components and SRP. *Cell Rep.* **13**, 944-956 (2015).
- 674 75 Hori, O. *et al.* Deletion of SERP1/RAMP4, a component of the endoplasmic reticulum (ER)  
675 translocation sites, leads to ER stress. *Mol. Cell. Biol.* **26**, 4257-4267 (2006).
- 676 76 Nauseef, W. M., McCormick, S. J. & Clark, R. A. Calreticulin functions as a molecular chaperone  
677 in the biosynthesis of myeloperoxidase. *J. Biol. Chem.* **270**, 4741-4747 (1995).
- 678 77 O'Connor, L. *et al.* Bim: a novel member of the Bcl-2 family that promotes apoptosis. *The EMBO*  
679 *journal* **17**, 384-395 (1998).
- 680 78 Marani, M., Tenev, T., Hancock, D., Downward, J. & Lemoine, N. R. Identification of novel  
681 isoforms of the BH3 domain protein Bim which directly activate Bax to trigger apoptosis. *Mol.*  
682 *Cell. Biol.* **22**, 3577-3589 (2002).
- 683 79 Muneta, Y., Shimoji, Y., Inumaru, S. & Mori, Y. Molecular cloning, characterization, and  
684 expression of porcine Fas ligand (CD95 Ligand). *J. Interferon Cytokine Res.* **21**, 305-312 (2001).
- 685 80 Ruiz-García, R. *et al.* Decreased activation-induced cell death by EBV-transformed B-cells from a  
686 patient with autoimmune lymphoproliferative syndrome caused by a novel FASLG mutation.  
687 *Pediatr. Res.* **78**, 603 (2015).

- 688 81 Nicholson, D. W. *et al.* Identification and inhibition of the ICE/CED-3 protease necessary for  
689 mammalian apoptosis. *Nature* **376**, 37 (1995).
- 690 82 Dai, R., Frejtag, W., He, B., Zhang, Y. & Mivechi, N. F. c-Jun NH2-terminal kinase targeting and  
691 phosphorylation of heat shock factor-1 suppress its transcriptional activity. *J. Biol. Chem.* **275**,  
692 18210-18218 (2000).
- 693 83 Cao, W.-X. *et al.* MLKL mediates apoptosis via a mutual regulation with PERK/eIF2 $\alpha$  pathway in  
694 response to reactive oxygen species generation. *Apoptosis* **23**, 521-531 (2018).
- 695 84 Lu, X.-X. *et al.* PTEN inhibits cell proliferation, promotes cell apoptosis, and induces cell cycle  
696 arrest via downregulating the PI3K/AKT/hTERT pathway in lung adenocarcinoma A549 cells.  
697 *BioMed research international* **2016** (2016).
- 698 85 Chen, C.-Y., Chen, J., He, L. & Stiles, B. L. PTEN: tumor suppressor and metabolic regulator. *Front.*  
699 *Endocrinol. (Lausanne)* **9** (2018).
- 700 86 Lee, Y. S. *et al.* Dysregulation of adipose glutathione peroxidase 3 in obesity contributes to local  
701 and systemic oxidative stress. *Mol. Endocrinol.* **22**, 2176-2189 (2008).
- 702 87 Bierl, C., Voetsch, B., Jin, R. C., Handy, D. E. & Loscalzo, J. Determinants of human plasma  
703 glutathione peroxidase (GPx-3) expression. *J. Biol. Chem.* **279**, 26839-26845 (2004).
- 704 88 Ighodaro, O. & Akinloye, O. First line defence antioxidants-superoxide dismutase (SOD), catalase  
705 (CAT) and glutathione peroxidase (GPX): Their fundamental role in the entire antioxidant  
706 defence grid. *Alexandria Journal of Medicine* **54**, 287-293 (2018).
- 707 89 Tsuji, K., Copeland, N., Jenkins, N. & Obinata, M. Mammalian antioxidant protein complements  
708 alkylhydroperoxide reductase (ahpC) mutation in Escherichia coli. *Biochem. J.* **307**, 377-381  
709 (1995).
- 710 90 Yamashita, H. *et al.* Characterization of human and murine PMP20 peroxisomal proteins that  
711 exhibit antioxidant activity in vitro. *J. Biol. Chem.* **274**, 29897-29904 (1999).
- 712 91 Knoop, B. *et al.* Cloning and characterization of AOEB166, a novel mammalian antioxidant  
713 enzyme of the peroxiredoxin family. *J. Biol. Chem.* **274**, 30451-30458 (1999).
- 714 92 Kang, S. W., Baines, I. C. & Rhee, S. G. Characterization of a mammalian peroxiredoxin that  
715 contains one conserved cysteine. *J. Biol. Chem.* **273**, 6303-6311 (1998).
- 716 93 Chen, J.-W., Dodia, C., Feinstein, S. I., Jain, M. K. & Fisher, A. B. 1-Cys peroxiredoxin, a  
717 bifunctional enzyme with glutathione peroxidase and phospholipase A2 activities. *J. Biol. Chem.*  
718 **275**, 28421-28427 (2000).
- 719 94 Schmieder, R. & Edwards, R. Quality control and preprocessing of metagenomic datasets.  
720 *Bioinformatics* **27**, 863-864 (2011).
- 721 95 Cunningham, F. *et al.* Ensembl 2015. *Nucleic Acids Res.* **43**, D662-D669 (2014).
- 722 96 Li, B. & Dewey, C. N. RSEM: accurate transcript quantification from RNA-Seq data with or  
723 without a reference genome. *BMC Bioinformatics* **12**, 323 (2011).
- 724 97 Langmead, B. & Salzberg, S. L. Fast gapped-read alignment with Bowtie 2. *Nat. Methods* **9**, 357  
725 (2012).
- 726 98 Robinson, M. D., McCarthy, D. J. & Smyth, G. K. edgeR: a Bioconductor package for differential  
727 expression analysis of digital gene expression data. *Bioinformatics* **26**, 139-140 (2010).
- 728 99 Reimand, J., Kull, M., Peterson, H., Hansen, J. & Vilo, J. g: Profiler—a web-based toolset for  
729 functional profiling of gene lists from large-scale experiments. *Nucleic Acids Res.* **35**, W193-  
730 W200 (2007).
- 731 100 Reimand, J. *et al.* g: Profiler—a web server for functional interpretation of gene lists (2016  
732 update). *Nucleic Acids Res.* **44**, W83-W89 (2016).
- 733 101 Jassal, B. *et al.* The reactome pathway knowledgebase. *Nucleic acids research* **48**, D498-D503,  
734 doi:10.1093/nar/gkz1031 (2020).

735 102 Krämer, A., Green, J., Pollard Jr, J. & Tugendreich, S. Causal analysis approaches in ingenuity  
736 pathway analysis. *Bioinformatics* **30**, 523-530 (2013).  
737 103 Manjunath, S. *et al.* Genomic analysis of host - Peste des petits ruminants vaccine viral  
738 transcriptome uncovers transcription factors modulating immune regulatory pathways. *Vet. Res.*  
739 **46**, 15, doi:10.1186/s13567-015-0153-8 (2015).  
740 104 Szklarczyk, D. *et al.* STRING v11: protein–protein association networks with increased coverage,  
741 supporting functional discovery in genome-wide experimental datasets. *Nucleic Acids Res.* **47**,  
742 D607-D613 (2018).  
743 105 Shannon, P. *et al.* Cytoscape: a software environment for integrated models of biomolecular  
744 interaction networks. *Genome Res.* **13**, 2498-2504 (2003).  
745 106 Schmittgen, T. D. & Livak, K. J. Analyzing real-time PCR data by the comparative C T method.  
746 *Nat. Protoc.* **3**, 1101 (2008).  
747

748

749

## 750 **Legends**

751 **Figure 1:** Overview of the work done : Two genetic groups (Tharparkar and Vrindavani) of  
752 cattle were exposed to a temperature of 42 °C for 7 days. Heat stress indicators - Respiration rate  
753 (RR), Rectal temperature and T3 level before exposure to heat (0day – control group) and at 7<sup>th</sup>  
754 day of exposure (treated) were measured to evaluate heat stress. At these time points, RNA was  
755 isolated from PBMCs for high throughput sequencing. Transcriptome analysis was done to  
756 identify differentially expressed genes (DEGs) under heat treatment in both genetic groups.  
757 Genes involved in physiological processes (heat stress response, apoptosis, ubiquitination,  
758 unfolded protein response and antioxidant level) that are commonly associated with heat stress  
759 were compared between the two genetic groups. Further, functional annotation of DEGs was  
760 done using IPA.

761 **Figure 2:** Respiration rate, Rectal Temperature and T3 level measured at 0 day (control) and 7  
762 day post-heat exposure (treated) in Vrindavani and Tharparkar (n=5) Levels sharing the same  
763 superscript are not significantly ( $P > 0.05$ ) different from each other.

764 **Figure 3:** Expression of DEGs in Vrindavani and Tharparkar under heat stress: (a) Venn  
765 diagrams showing unique/common DEGs between Vrindavani and Tharparkar (b) Number of  
766 upregulated and downregulated in both genetic groups (c) Contrast in the expression of common  
767 DEGs

768 **Figure 4:** Canonical pathways activated/inactivated in (a) Vrindavani (b) Tharparkar under heat  
769 stress generated in the core analysis of Ingenuity pathway analysis tool. Orange color pathways  
770 are activated ( $Z > 2$ ) and blue color pathways are inactivated ( $Z < -2$ ). Height of the bar graphs  
771 indicates  $-\log(p\text{-value})$  and line graph showing the ratio of list genes found in each pathway over  
772 the total number of genes in that pathway.

773 **Figure 5:** Canonical pathways generated in Ingenuity Pathway Analysis of Oncostatin M  
774 signaling pathway of DEGs in (A) Vrindavani, (B) Tharparkar. Genes that were upregulated are  
775 shown in red and downregulated in green. The intensity of red and green corresponds to an  
776 increase and decrease, respectively, in Log<sub>2</sub> fold change. Genes in grey were not significantly  
777 dysregulated and those in white are not present in the dataset but have been incorporated in the  
778 network through the relationship with other molecules by IPA.

779 **Figure 6:** Canonical pathways generated in Ingenuity Pathway Analysis of PTEN signaling  
780 pathway of DEGs in (A) Vrindavani, (B) Tharparkar. Genes that were upregulated are shown in  
781 red and downregulated in green. The intensity of red and green corresponds to an increase and  
782 decrease, respectively, in Log<sub>2</sub> fold change. Genes in grey were not significantly dysregulated  
783 and those in white are not present in the dataset but have been incorporated in the network  
784 through the relationship with other molecules by IPA.

785 **Figure 7:** Contrast in the expression of genes involved in heat stress response, apoptosis,  
786 ubiquitination, unfolded protein response and balance in the production of ROS and antioxidants  
787 between two genetic groups.

788 **Figure 8: Predicted interplay of molecules that is underway during heat stress in both**  
789 **groups :** Heat stress causes unfolding of native proteins. HSP70 acts as a chaperone to facilitate  
790 refolding to restore the structure of unfolded proteins. Under normal condition, HSP70 is bound  
791 to HSF1 thereby preventing HSF1 to promote transcription of HSP70. Under heat stress ATP  
792 binds to the HSP70 and HSF1 complex to release HSF1, promoting the binding of the unfolded  
793 protein to HSP70 and ATP. CAMK2D that induces the transcription of HSP70 via HSF1 was  
794 found downregulated in Tharparkar. GSK3A that inhibits the trimerization of HSF1 that is  
795 needed for the induction of HSP70 expression was found upregulated in Tharparkar. The  
796 decreased level of HSP70 in Vrindavani makes it inevitable that such negative feedbacks would  
797 further reduce its level and GSK3A was found downregulated and CAMK2D, upregulated.

798 Further, in Tharparkar, HSP70 tends to activate ubiquitination pathway to decrease the  
799 accumulation of unfolded proteins that can't be refolded by it. This pathway activation is  
800 supported by upregulation of E3 ligases (UBE2G1, UBE2S, and UBE2H) in Tharparkar.  
801 However, the E3 ligase in Vrindavani was found downregulated. With HSP70 being upregulated  
802 and having cytoprotection activity, Tharparkar shows the decline in apoptosis as compared to  
803 Vrindavani. This is supported by downregulation of BCL2L11, FASLG, MLKL, CASP3,  
804 MAPK8 and VIM in Tharparkar and vice-versa. Besides, higher expression of the antioxidants  
805 (SOD, CAT, GPX) in Tharparkar enables it to cope up with higher levels of free radicals  
806 generated as a result of heat stress while Vrindavani is unable to do so. Green arrow indicates  
807 downregulation and Maroon arrow indicates upregulation.

808 **Supplementary.Figure 1:** Comparison of activated/inactivated pathways in Vrindavani and  
809 Tharparkar. Activated pathways have Z score  $> 2$  and indicated by red colour while inactivated  
810 pathways are having Z score  $< - 2$  and indicated by green colour.

811 **Supplementary Figure 2:** Comparison of activated/inactivated miRNAs in Vrindavani and  
812 Tharparkar as predicted by IPA upstream analysis. Activated pathways have Z score  $> 2$  and  
813 indicated by red colour while inactivated pathways are having Z score  $< - 2$  and indicated by  
814 green colour.

815 **Supplementary Figure 3:** Comparison of activated/inactivated Transcription factors as  
816 predicted by IPA upstream analysis (Transcription factors of Vrindavani are red-coloured and  
817 Tharparkar are blue-coloured ) vis-à-vis their Log2FC in both genetic groups. The encircled ones  
818 are common to both groups.

819 **Supplementary Figure 4:** Predicted Protein-protein interaction network of expressed genes  
820 common to Tharparkar and Vrindavani. The diameter of the node represents the  
821 connectivity/degree of the node among the genes.

822 **Supplementary Figure 5:** Validation of RNA sequencing data by Real-Time data in Vrindavani  
823 (a) and Tharparkar (b). The expression of 10 selected genes was found in concordance with RNA  
824 Sequencing data. The correlation (  $r^2 = 0.9942$  in (a) and  $0.9972$  in (b) ) was found to be  
825 significant ( $P < .01$ ) in both cases.





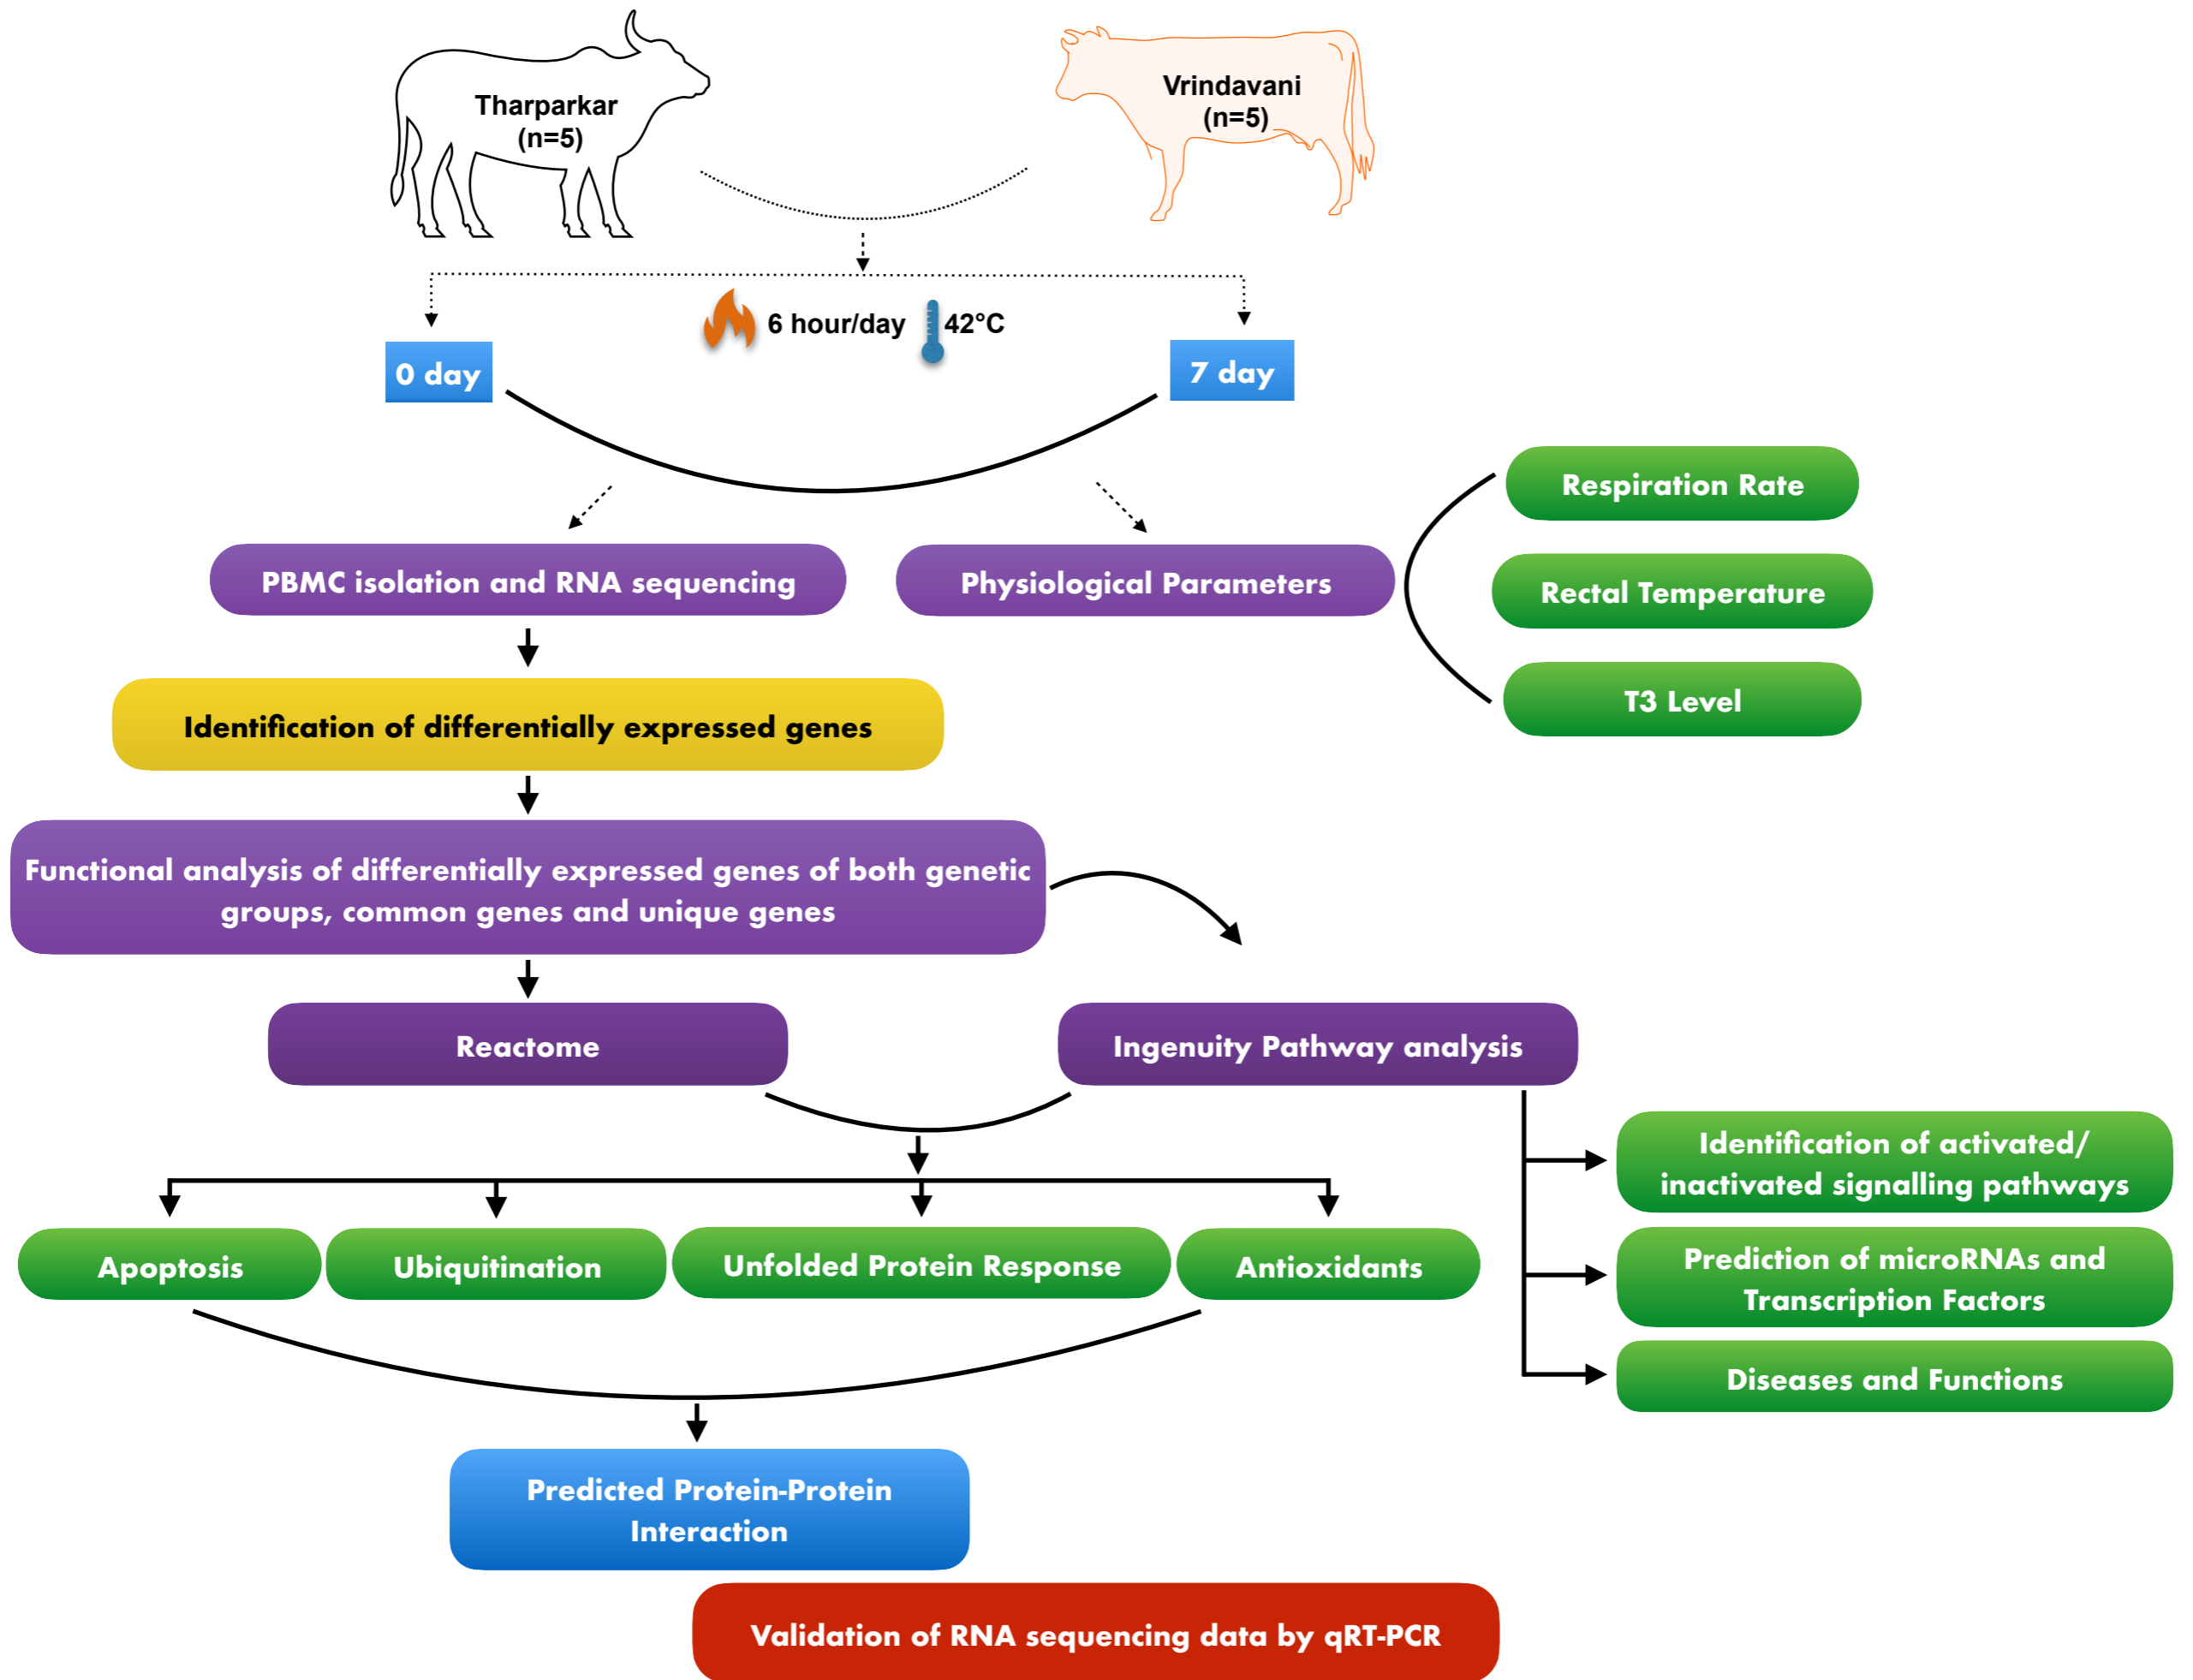

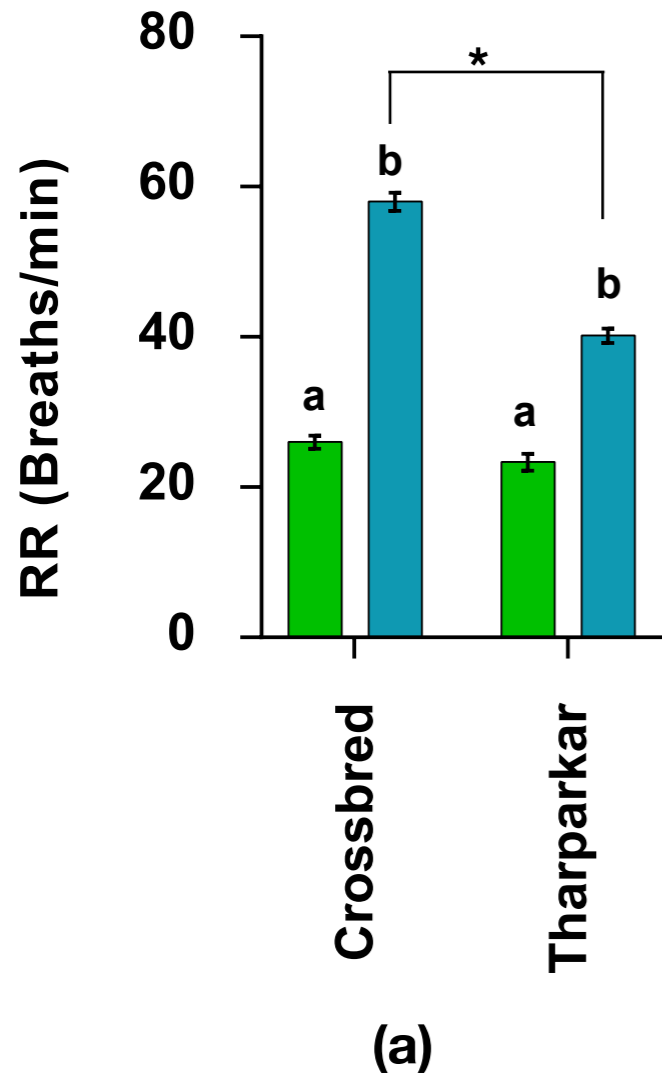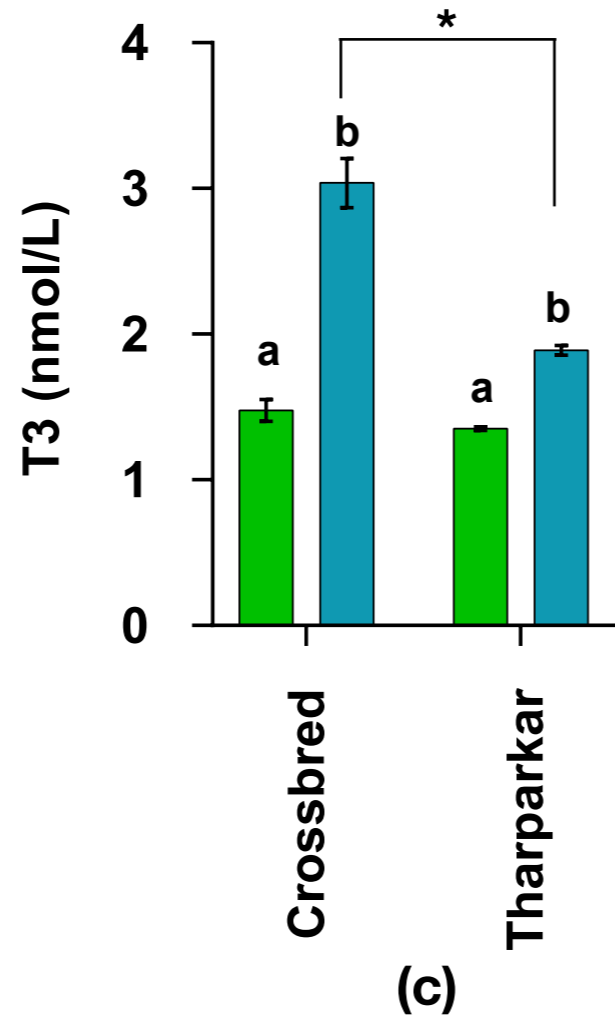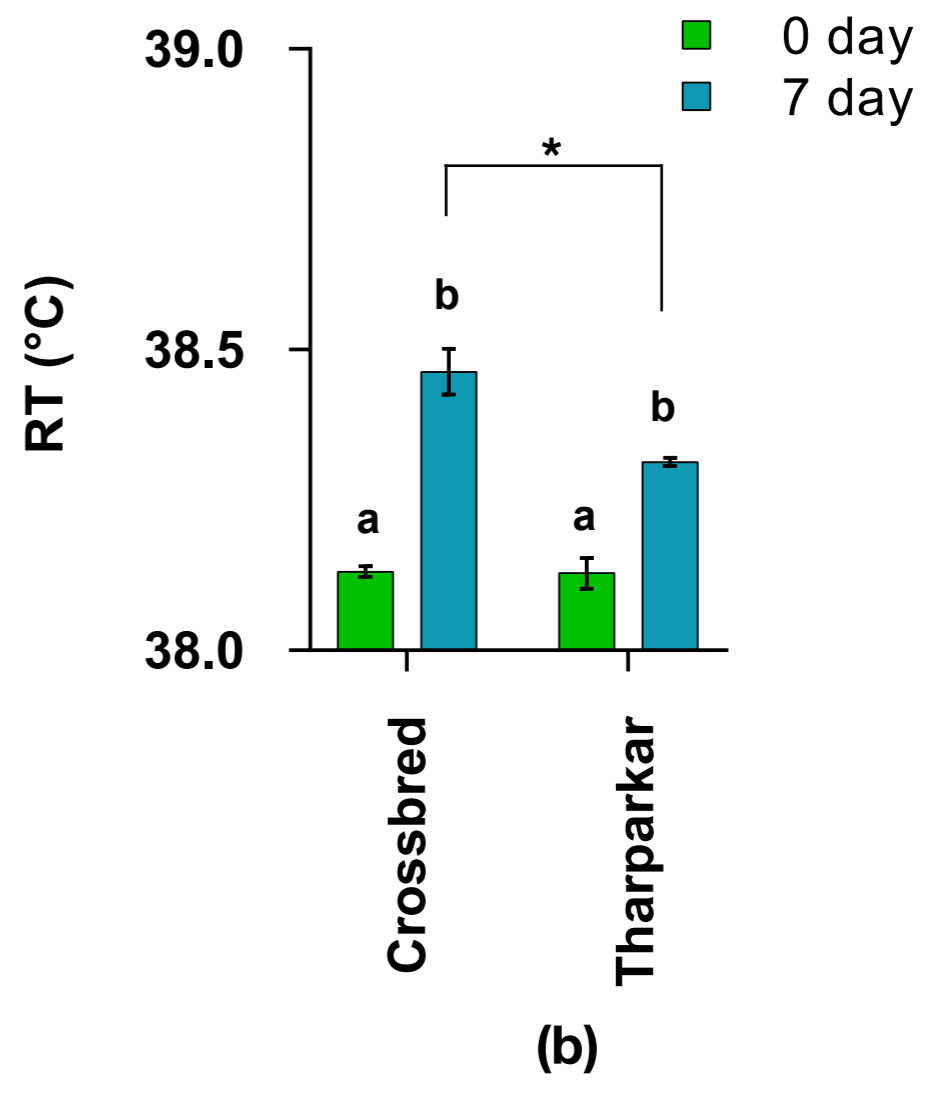

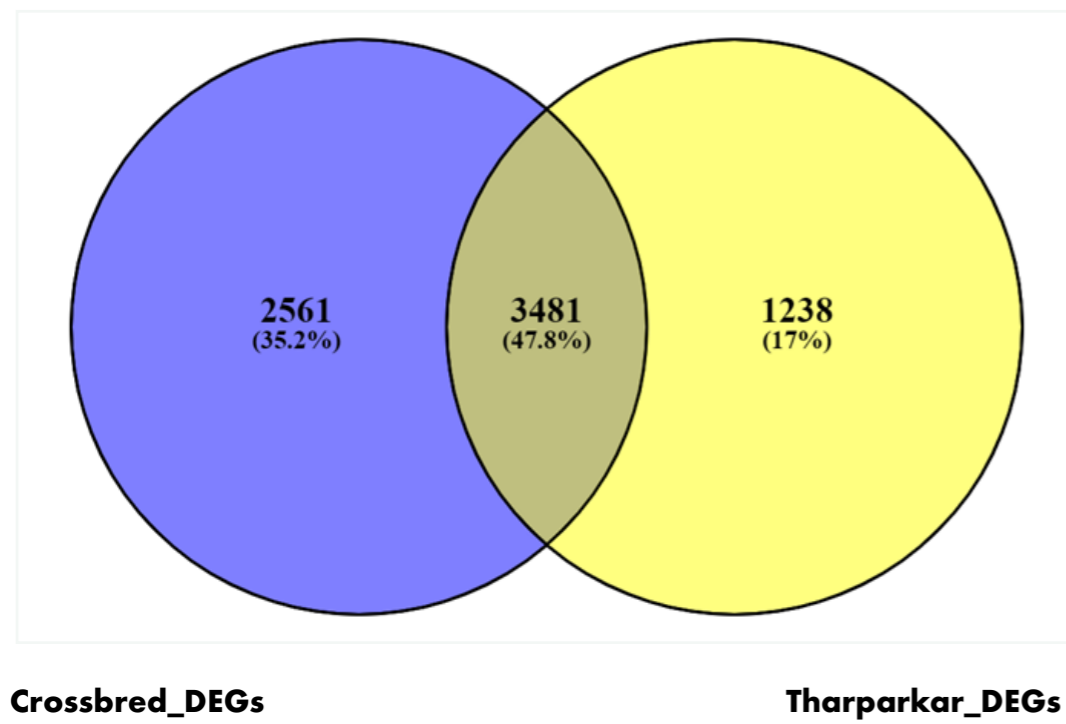

(a)

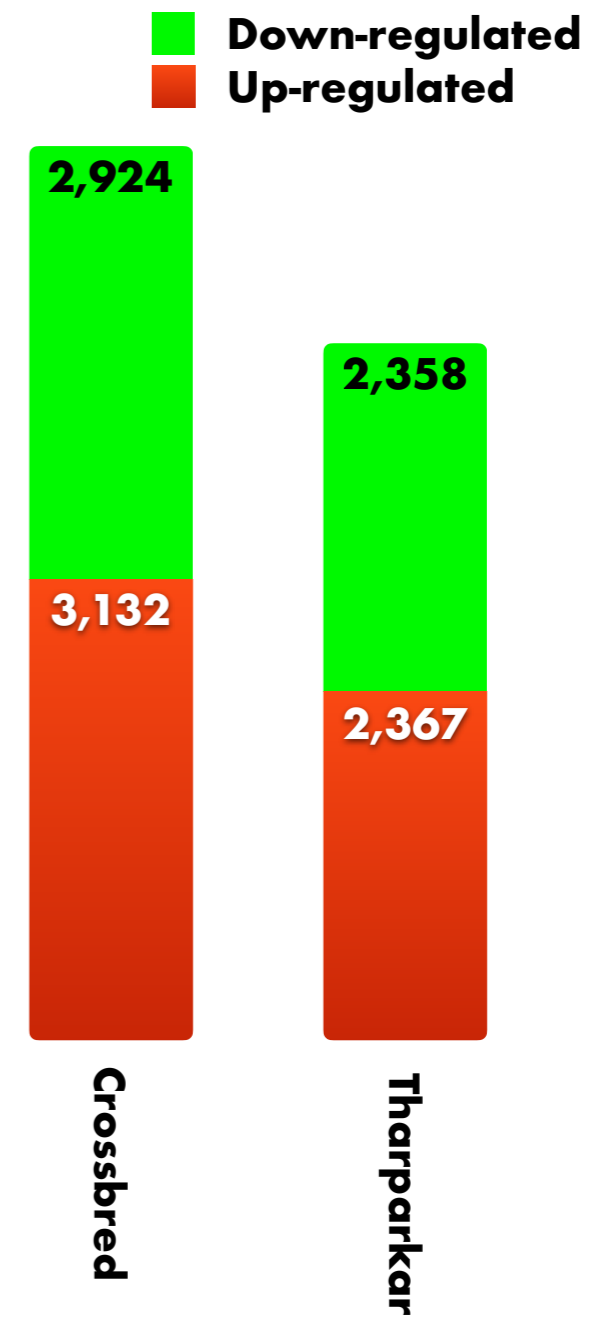

(b)

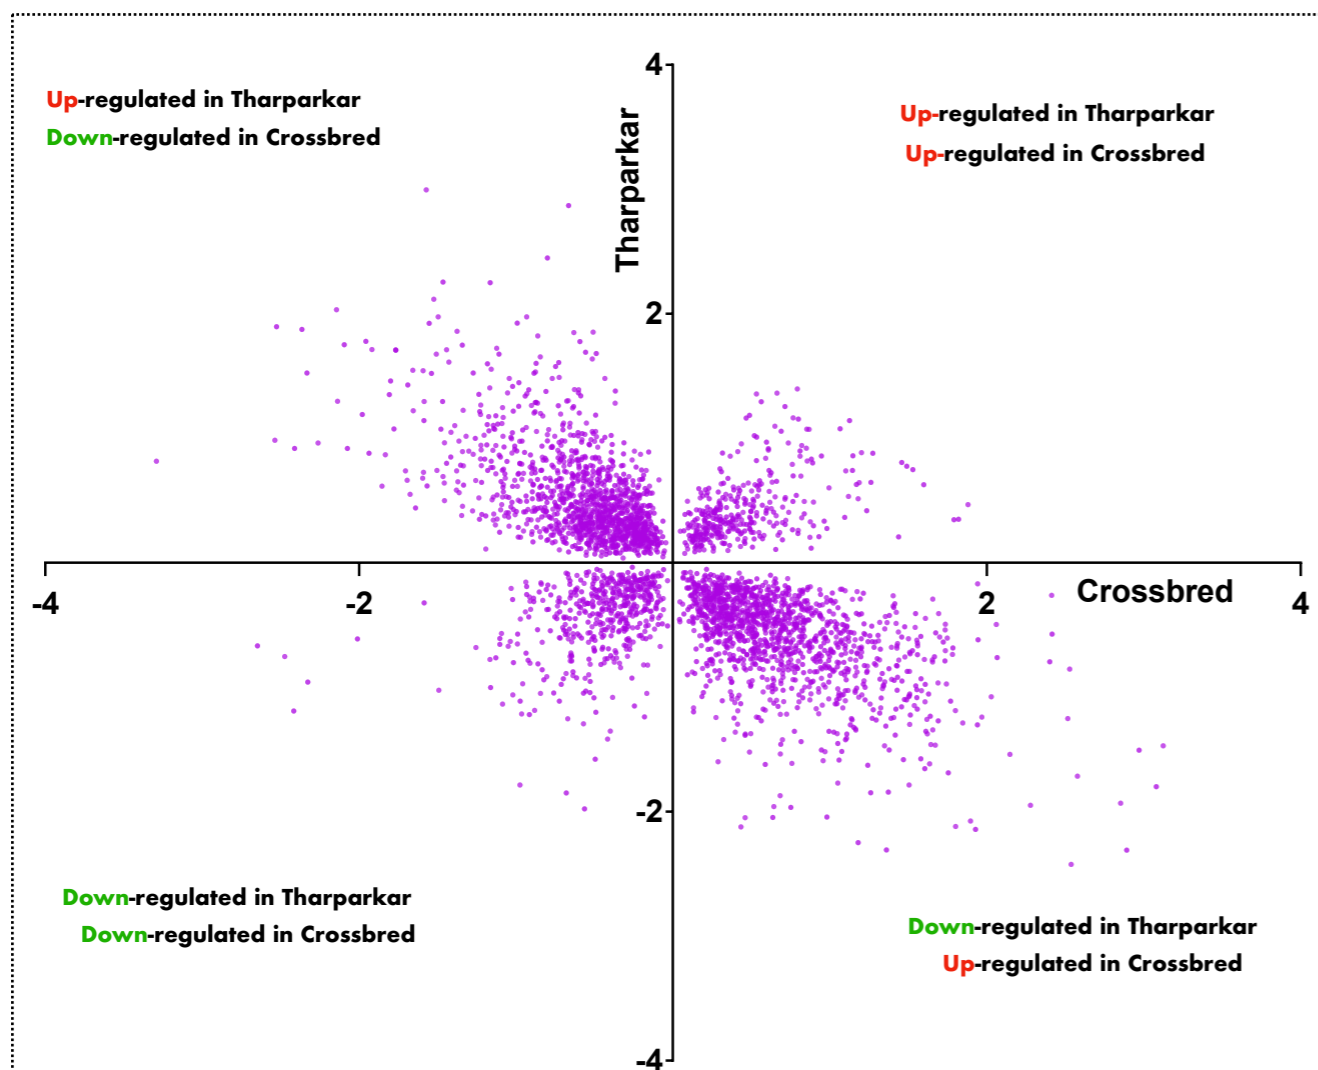

(c)

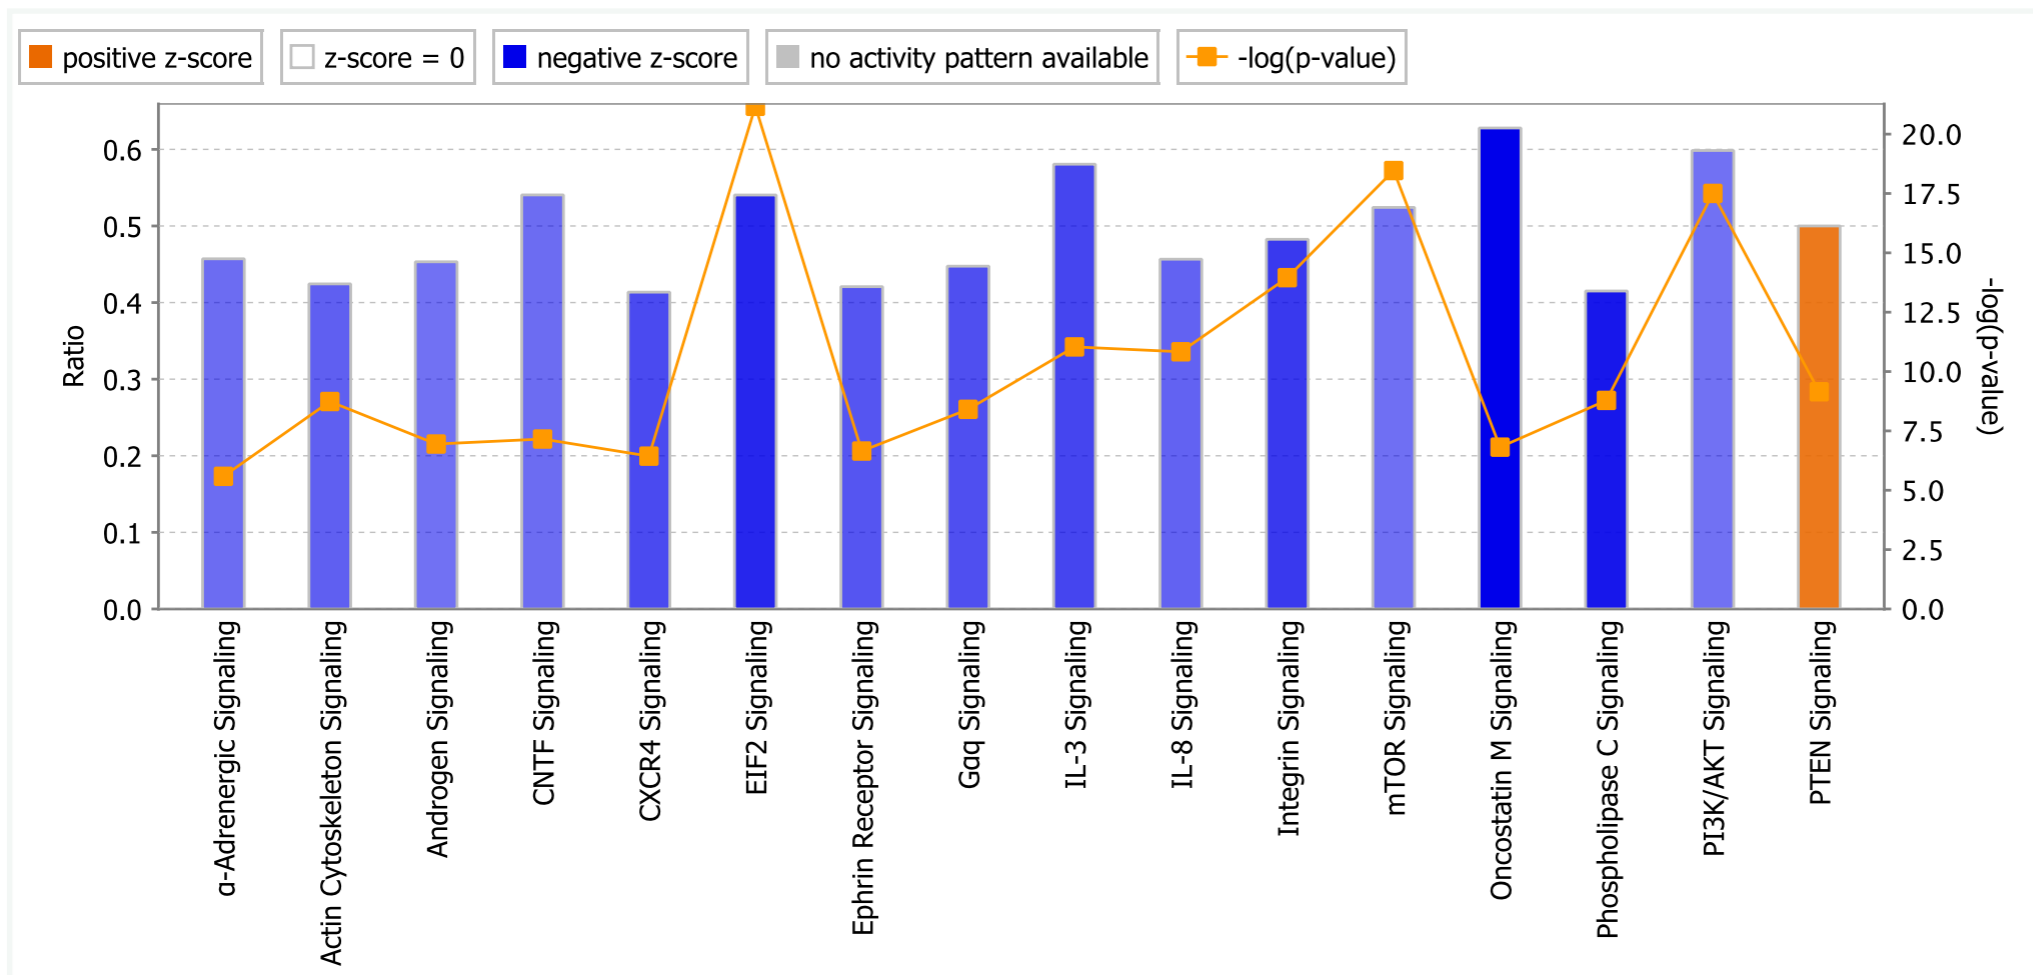

(a)

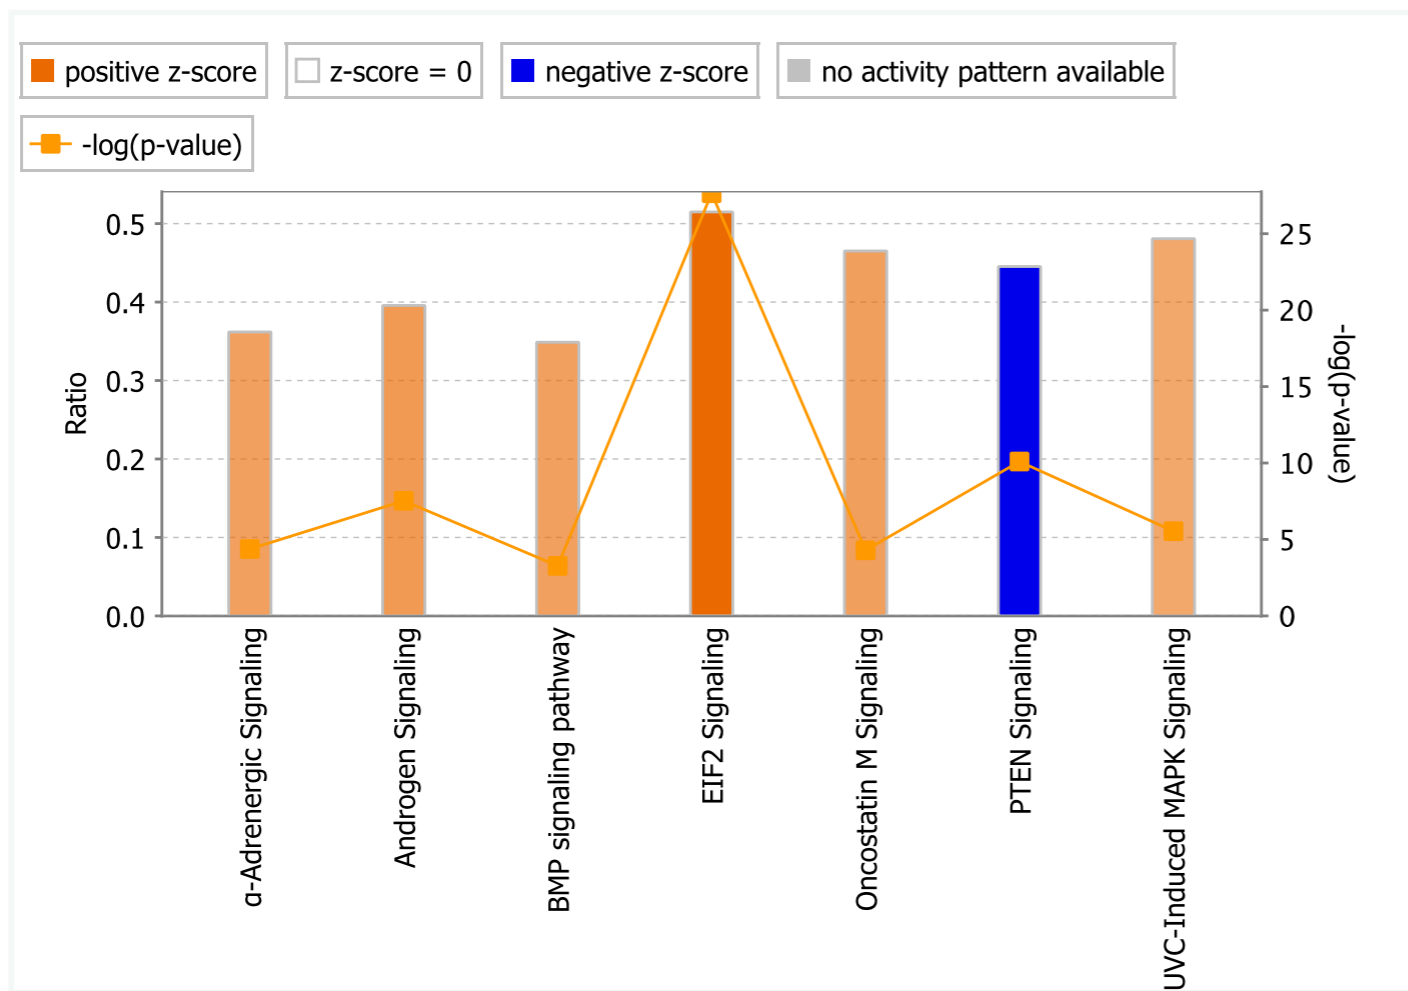

(b)

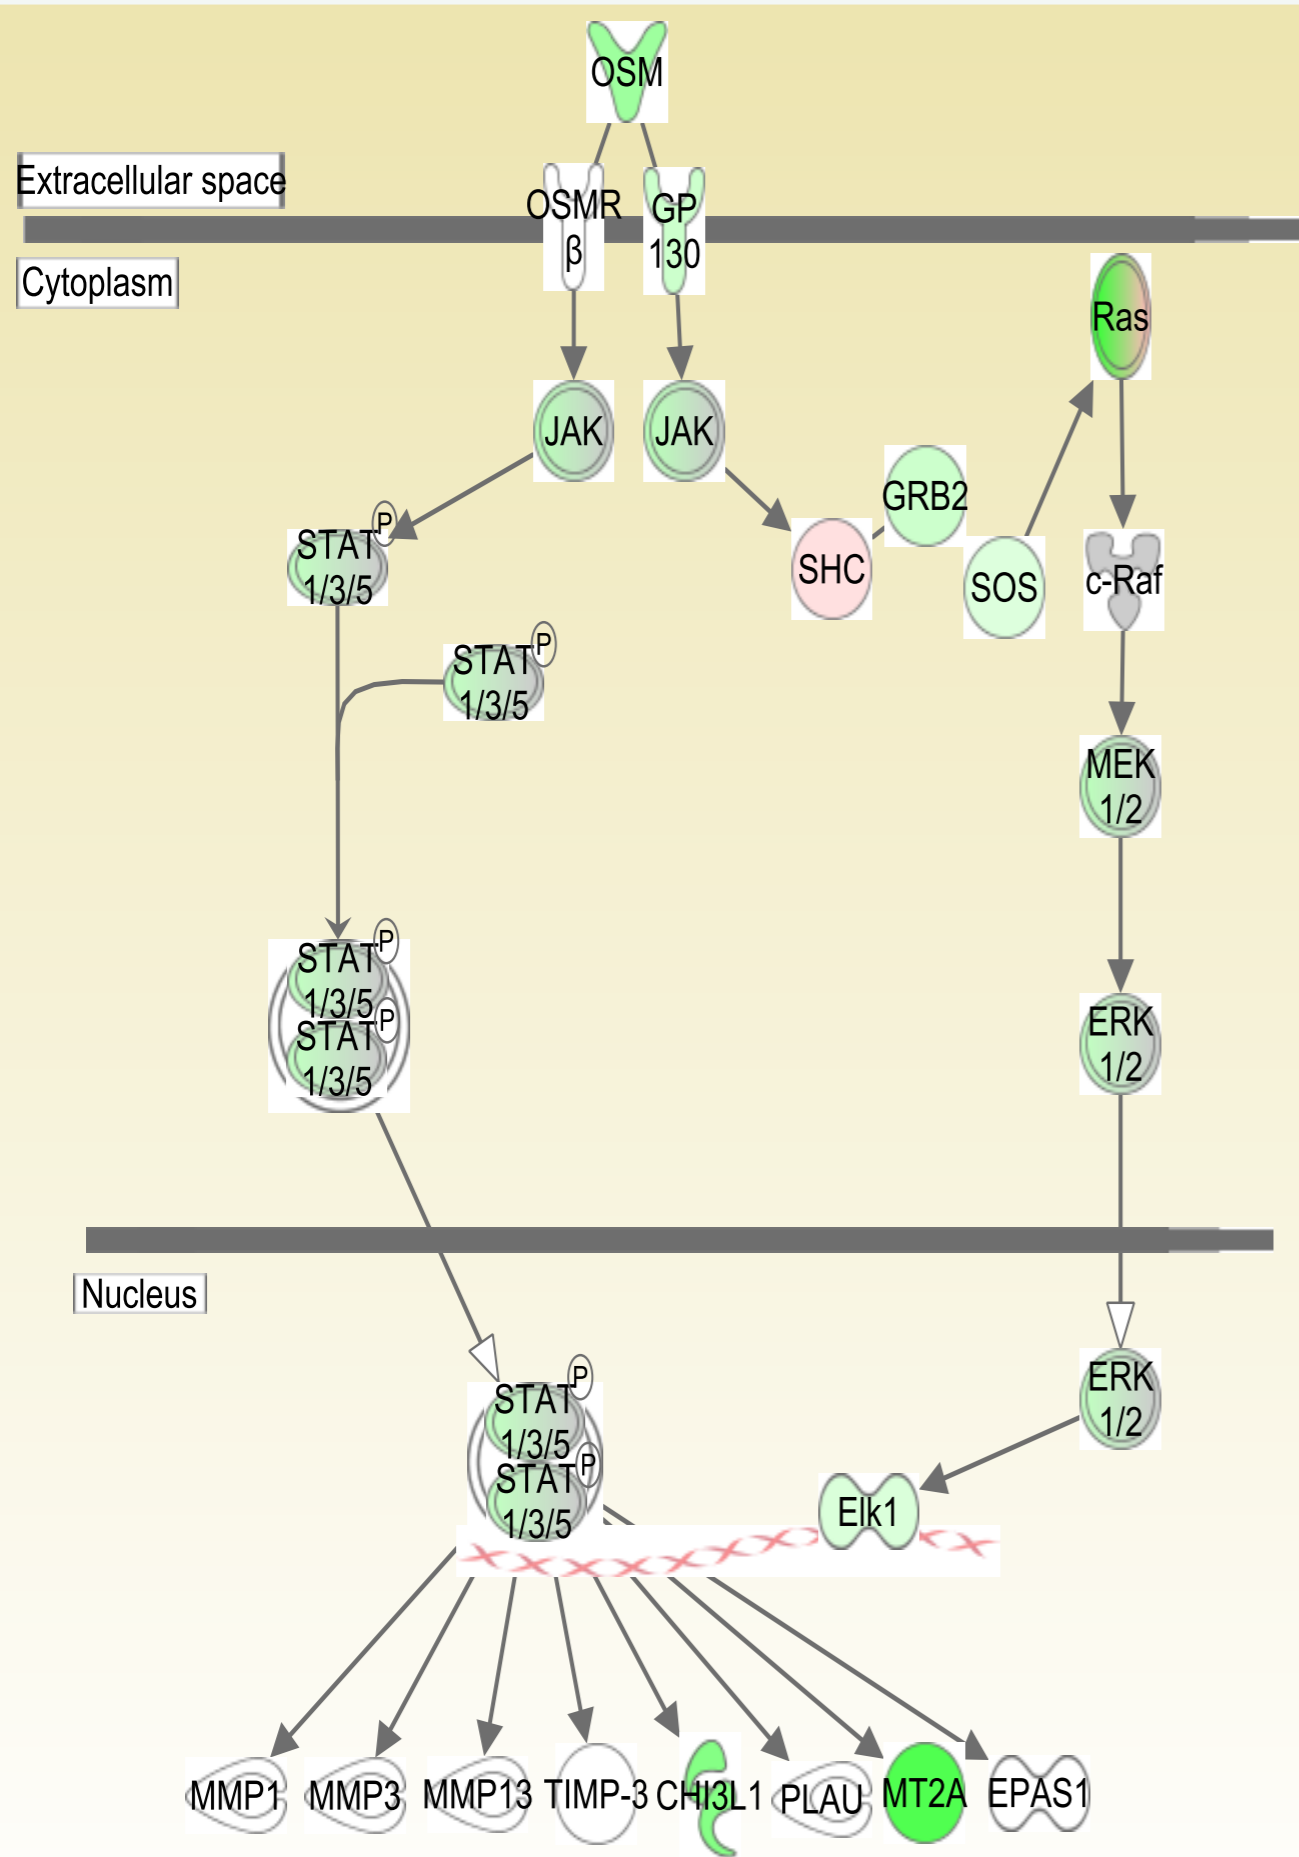

(a)

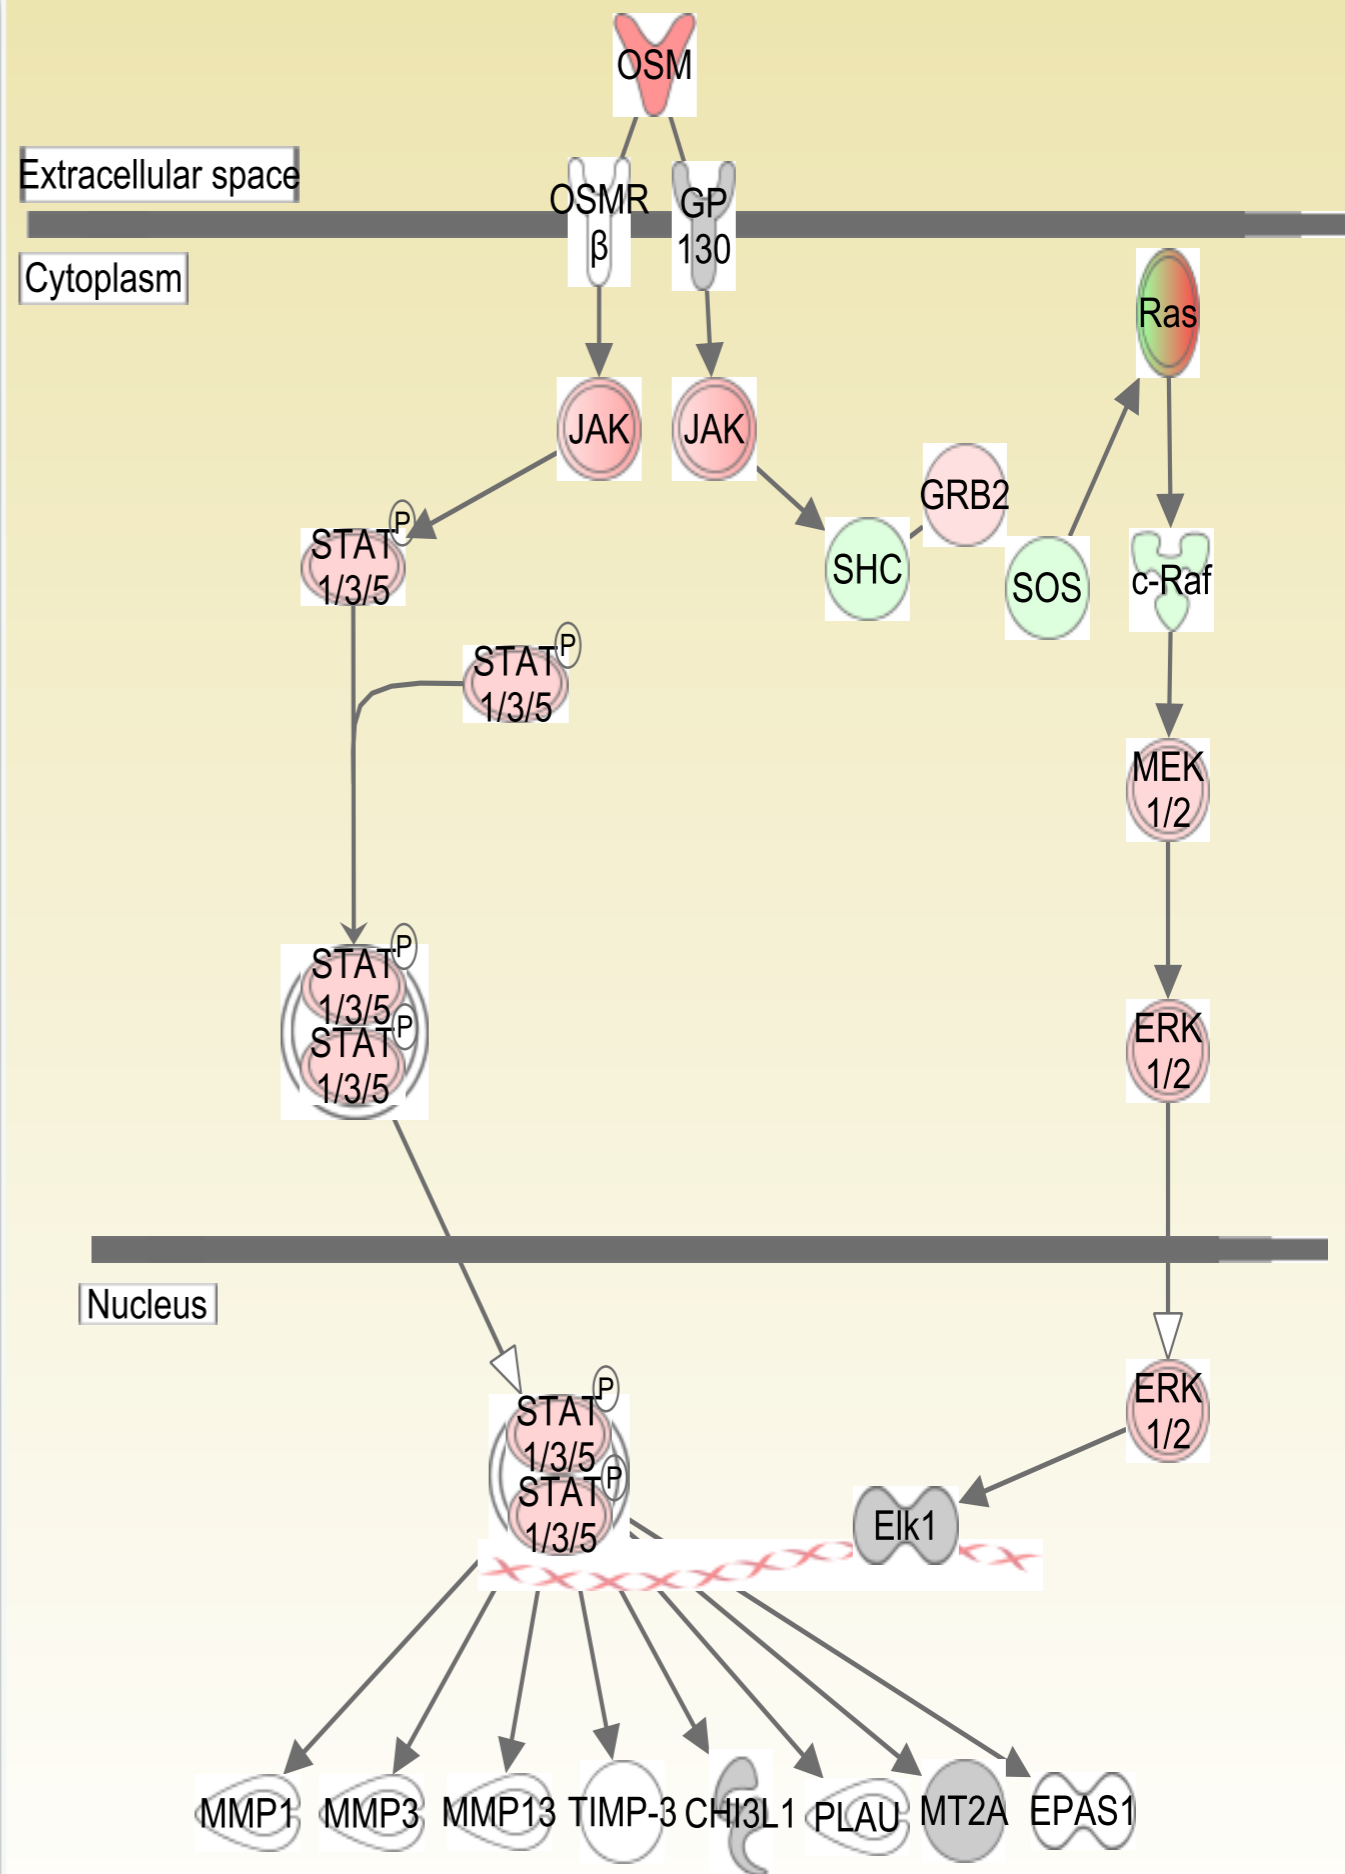

(b)

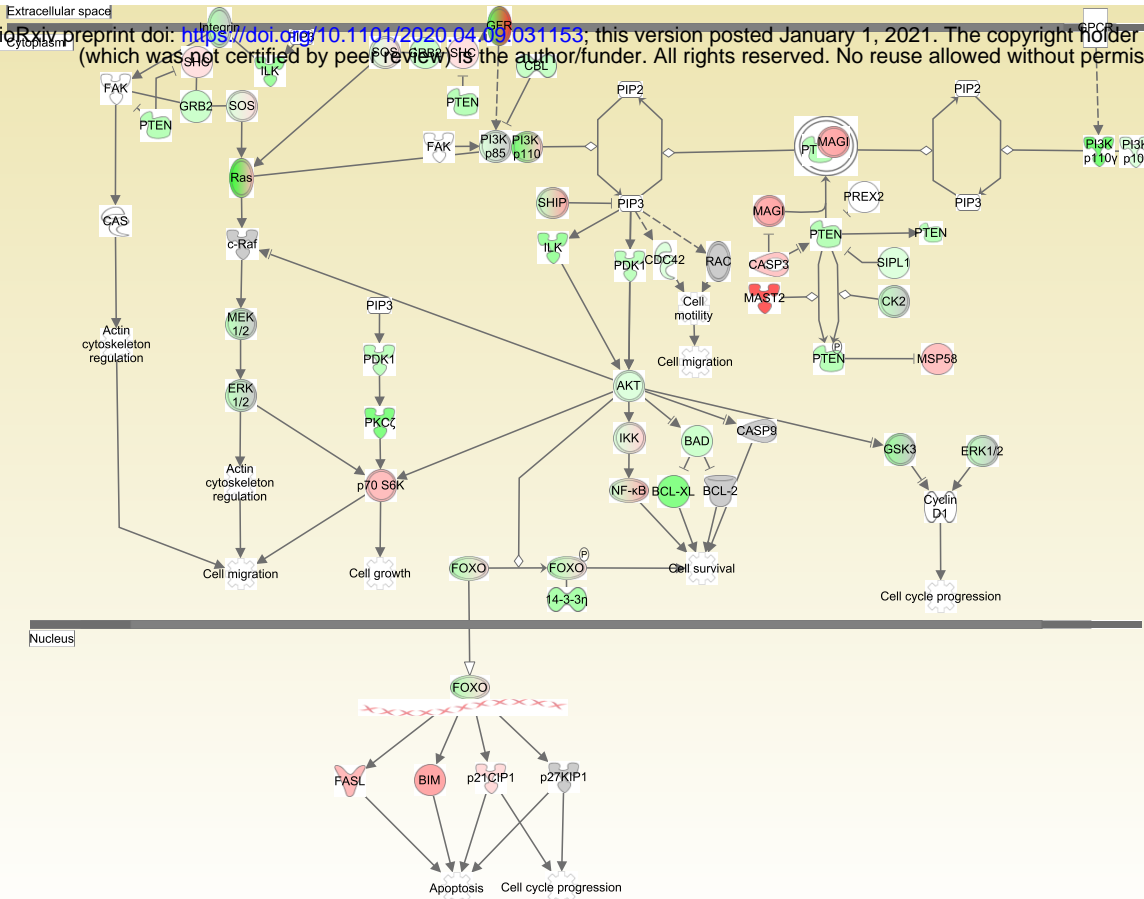

(a)

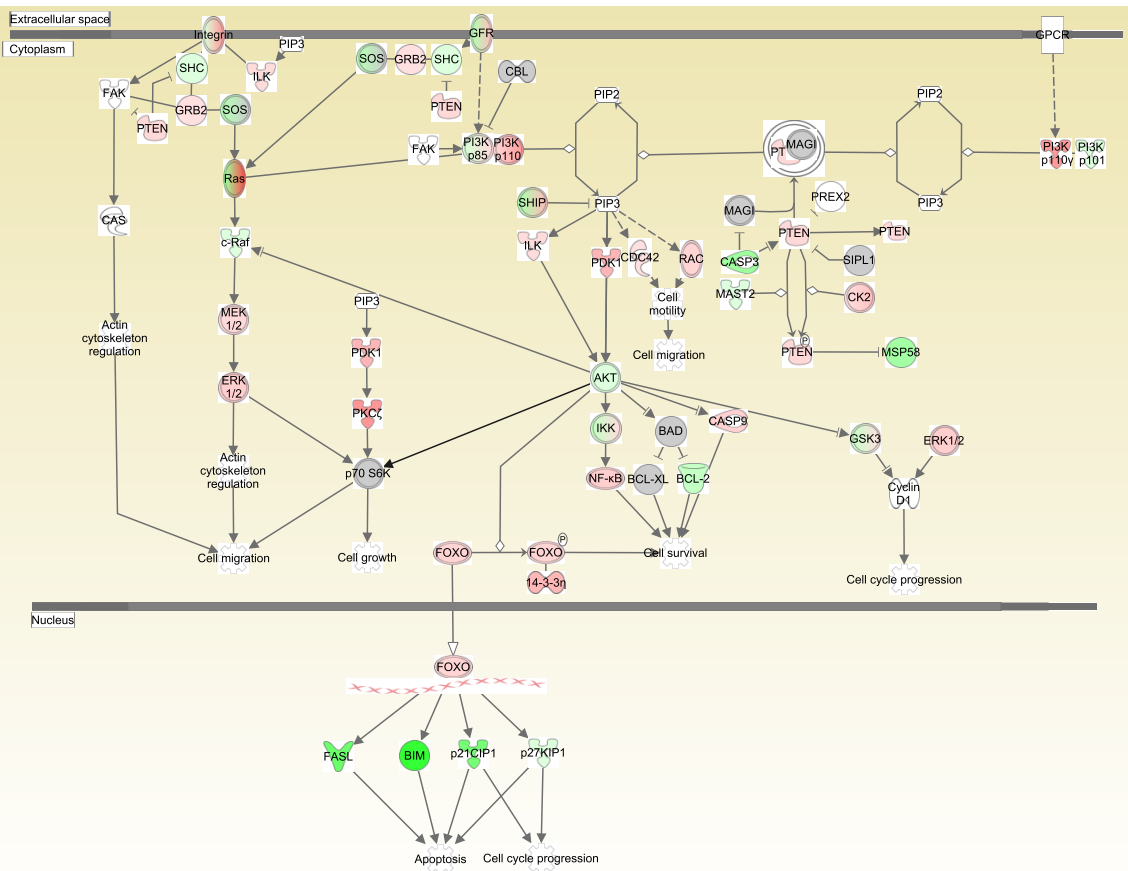

(b)

bioRxiv preprint doi: <https://doi.org/10.1101/2020.04.09.031153>; this version posted January 1, 2021. The copyright holder for this preprint (which was not certified by peer review) is the author/funder. All rights reserved. No reuse allowed without permission.

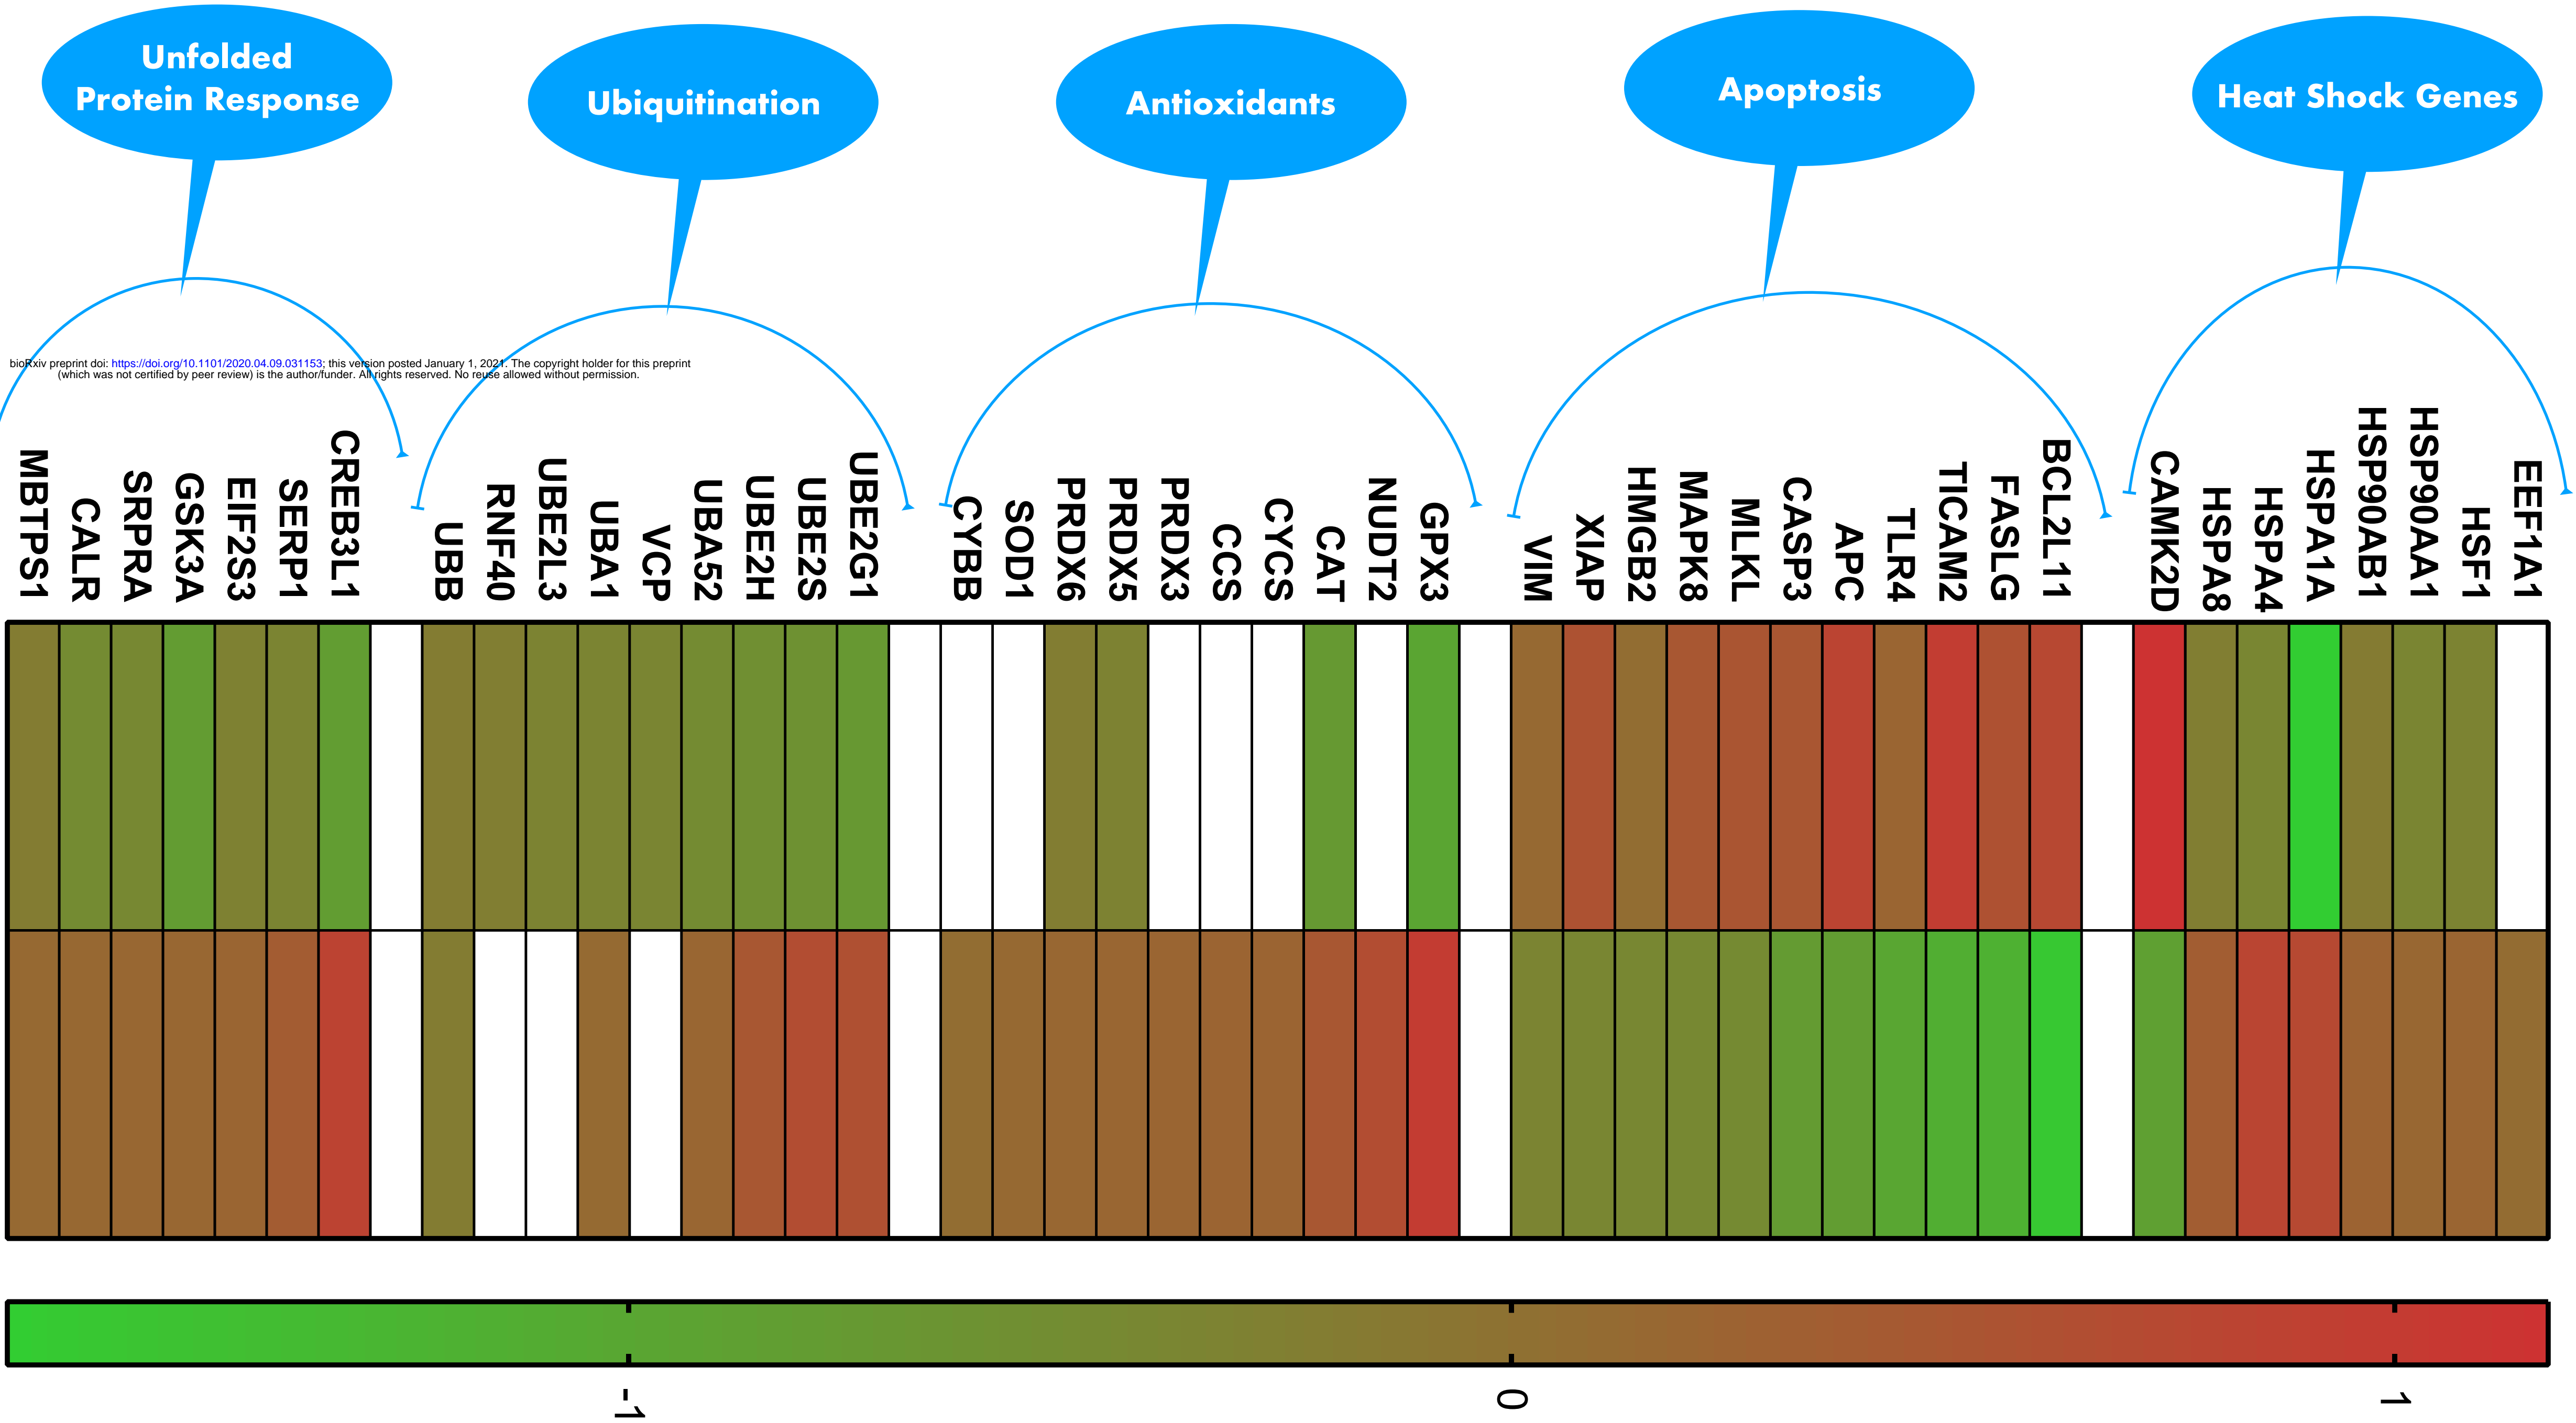



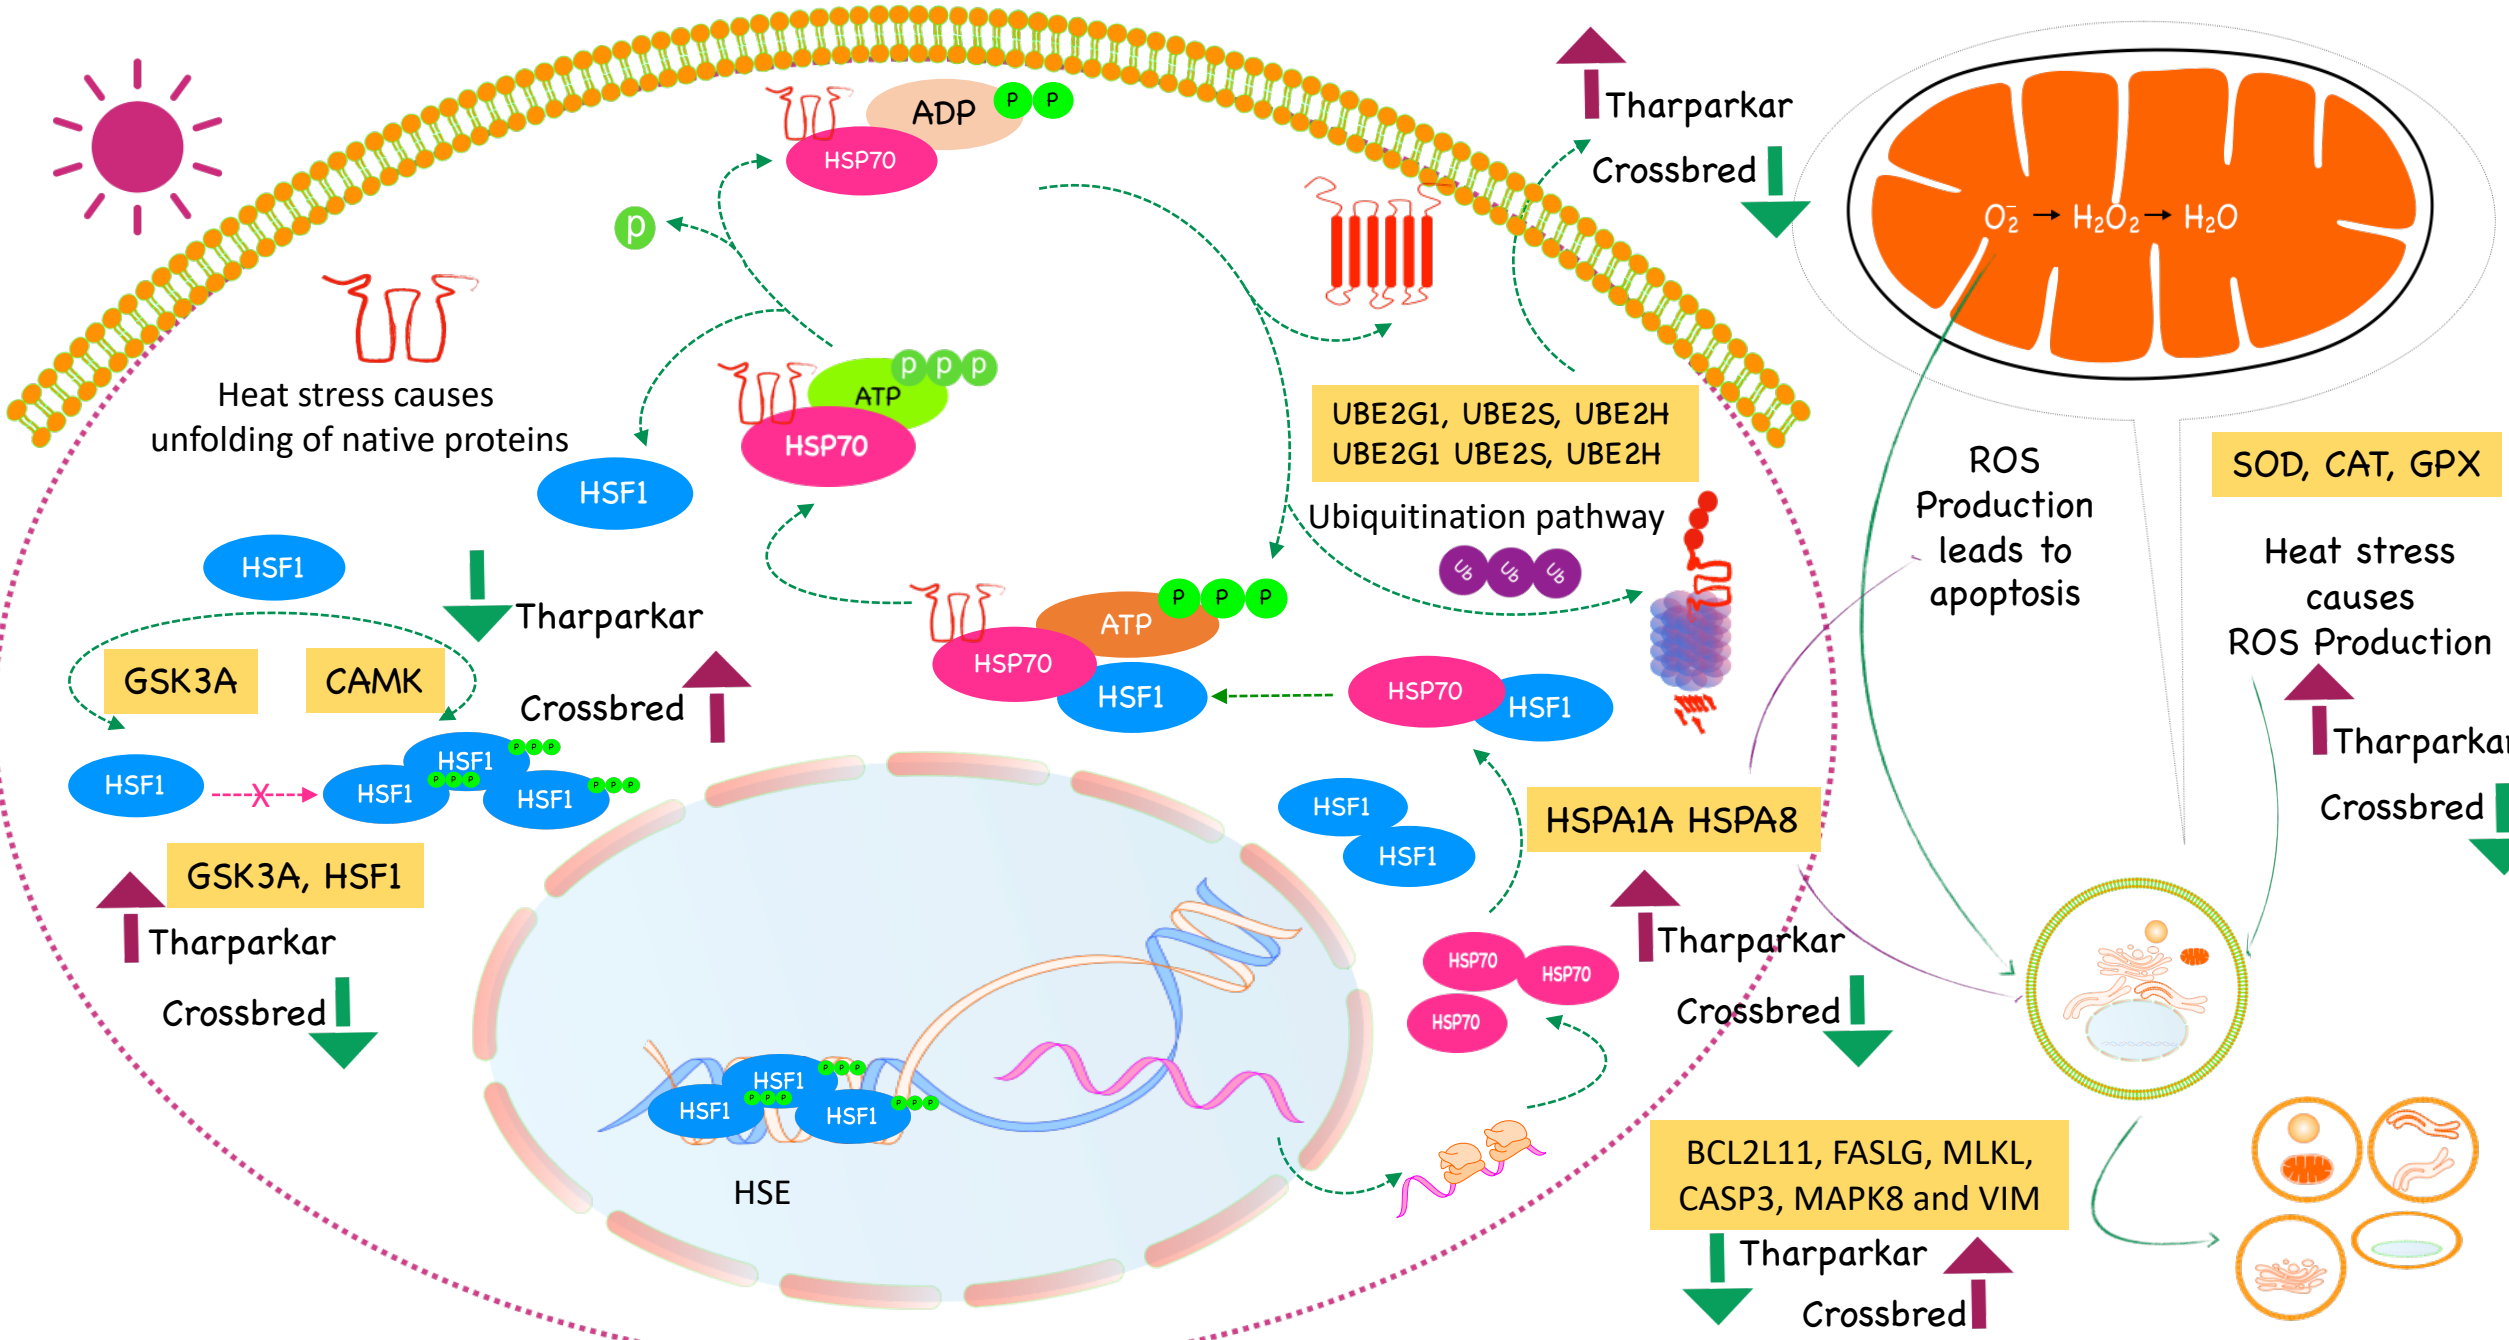

Source: https://www.biorxiv.org/content/biorxiv/early/2021/01/01/2020.04.09.031153.full.pdf
